# Supplementary material for: Copper-mediated 1,2-bis(trifluoromethylation) of arynes
Source: Royal Society of Chemistry journal article supplement (doi:10.1039/c8sc03754j), 2018-01-01

## Copper-Mediated 1,2-Bis(trifluoromethylation) of Arynes

Xinkan Yang and Gavin Chit Tsui\*

### Table of Contents

---

|                                    |     |
|------------------------------------|-----|
| General Experimental.....          | S1  |
| Materials.....                     | S1  |
| Instrumentation.....               | S1  |
| Experimental Procedures.....       | S2  |
| Mechanistic studies.....           | S11 |
| Table S1 Optimization studies..... | S14 |
| Characterization Data.....         | S16 |
| Spectra.....                       | S23 |

---

**General Experimental.** Unless otherwise noted, reactions were carried out under argon in a 25mL round-bottom flask with magnetic stirring. Analytical thin layer chromatography (TLC) was performed with EM Science silica gel 60 F254 aluminum plates. Visualization was done under a UV lamp (254 nm) and by immersion in ethanolic phosphomolybdic acid (PMA) or potassium permanganate (KMnO<sub>4</sub>), followed by heating using a heat gun. Organic solutions were concentrated by rotary evaporation at 23–35 °C. Purification of reaction products were generally done by flash column chromatography with Grace Materials Technologies 230–400 mesh silica gel.

**Materials.** Fluoroform (Research Grade, Purity: 99.999% min., 9.1kg in 16 L size cylinder) was purchased from SynQuest Laboratories, USA. Copper(I) chloride (extra pure, 99.99%) was purchased from Acros. Et<sub>3</sub>N·3HF (97%) and anhydrous DMSO was purchased from J&K Scientific. Potassium *tert*-butoxide (97%) was purchased from Alfa Aesar. DMF was dried over Solvent Purification System then bubbled with argon for 24 h. Other chemicals for substrates preparation were purchased from Acros, J&K Scientific, Aldrich and Dikemann.

**Instrumentation.** Proton nuclear magnetic resonance spectra (<sup>1</sup>H NMR) spectra, carbon nuclear magnetic resonance spectra (<sup>13</sup>C NMR) and fluorine nuclear magnetic resonance spectra (<sup>19</sup>F NMR) were recorded at 23 °C on a Bruker 400 spectrometer in CDCl<sub>3</sub> (400 MHz for <sup>1</sup>H, 101 MHz for <sup>13</sup>C and 376 MHz for <sup>19</sup>F) and Bruker 500 spectrometer in CDCl<sub>3</sub> (500 MHz for <sup>1</sup>H, 126 MHz for <sup>13</sup>C and 470 MHz for <sup>19</sup>F). Chemical shifts for protons were reported as parts per million in δ scale using solvent residual peak (CHCl<sub>3</sub>: 7.26 ppm) or tetramethylsilane (0.00 ppm) as internal standards. Chemical shifts of <sup>13</sup>C NMR spectra were reported in ppm from the central peak of CDCl<sub>3</sub> (77.16 ppm) on the δ scale. Chemical shifts of <sup>19</sup>F NMR are reported as parts per million in δ scale using benzotrifluoride (-63.72 ppm) as internal standards. Data are represented as follows: chemical shift, integration, multiplicity (s = singlet, d = doublet, t = triplet, q = quartet, qn = quintuplet, sx = sextet, sp = septuplet, m = multiplet, br = broad), and coupling constant (*J*, Hz). High resolution mass spectra (HRMS) were obtained on a Finnigan MAT 95XL GC Mass Spectrometer or a Thermo Scientific Q Exactive Focus Mass Spectrometer or Bruker 9.4T FTICR Mass Spectrometer. The control experiment results were obtained on a Shimadzu GCMS-QP2010 SE GC MS Spectrometer.

## Experimental Procedures.

### Preparation of fluoroform-derived [CuCF<sub>3</sub>] reagent:<sup>1</sup>

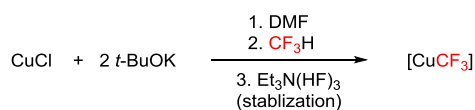

In a glove box, to a glass tube was charged CuCl (400 mg, 4.0 mmol), *t*-BuOK (944 mg, 8.0 mmol) and a stirrer bar. The tube was sealed with a septum, brought out of the glove box and put under an argon atmosphere. Degassed DMF (8.0 mL) was added *via* syringe and the mixture was stirred at room temperature for 30 min. Then fluoroform was bubbled into the mixture by using a needle connected to the fluoroform cylinder at room temperature for 3 min. After removing the fluoroform inlet, the mixture was stirred for 5 min and Et<sub>3</sub>N(HF)<sub>3</sub> (212 μL, 1.32 mmol) was slowly added under argon and the mixture was stirred for another 5 min. A slightly brown solution with some white solid was obtained as the [CuCF<sub>3</sub>] solution in DMF (~0.40 M).

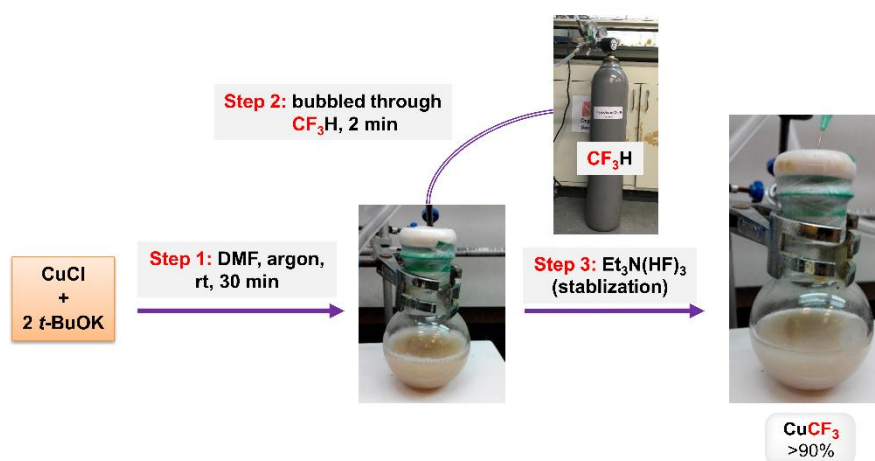

### General procedure for 1,2-bis(trifluoromethylation) of arynes:

Under argon, to a 25 mL round-bottom flask equipped with a magnetic stir bar was added benzyne precursor **1** (0.4 mmol), DDQ (0.8 mmol) and DMSO. A solution of [CuCF<sub>3</sub>] in DMF (4.0 mL, 1.6 mmol) was added dropwise to the above mixture under argon at 0 °C. The reaction mixture was warmed up to room temperature and stirred under argon for 24 h, then quenched with sat. aq. NaHCO<sub>3</sub> solution, neutralized with 1 M HCl, and extracted with diethyl ether for three times. The organic layers were combined, washed with water then brine, dried over anhydrous Na<sub>2</sub>SO<sub>4</sub>, filtered and concentrated by rotary evaporator. The crude product was purified by flash column chromatography on silica gel.

(1) (a) Zanardi, A.; Novikov, M. A.; Martin, E.; Benet-Buchholz, J.; Grushin, V. V. *J. Am. Chem. Soc.* **2011**, *133*, 20901. (b) Yang, X.; Tsui, G. C. *Org. Lett.* **2018**, *20*, 1179.

## Aryne precursors:

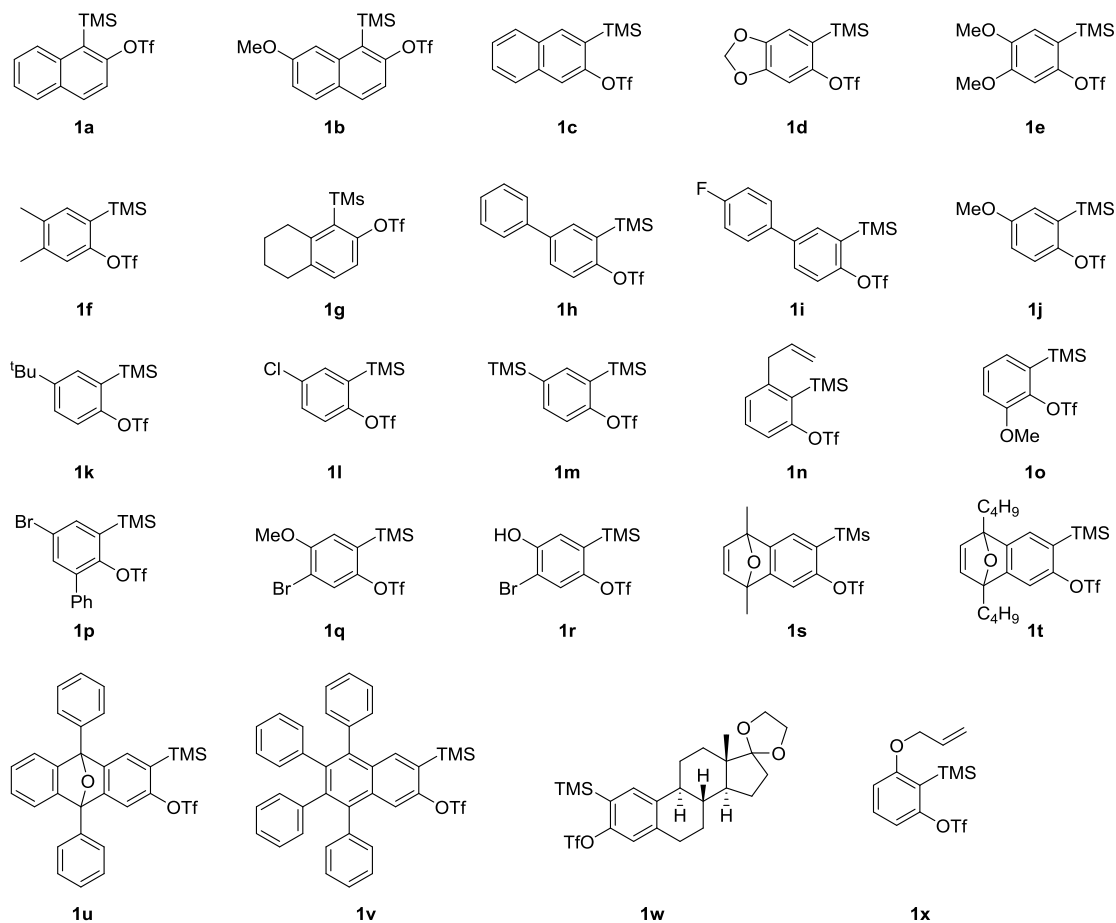

The aryne precursors **1a-1h**, **1i-1p**, **1r**, **1v**, were synthesized according to the literature procedures<sup>2</sup> from the corresponding 2-bromophenol. **1q** was synthesized from **1r**, **1w** was prepared from estrone through five steps according to literature reported procedure<sup>2q</sup>.

(2) (a) Medina, M. J.; Mackey, J. L.; Garg, N. K.; Houk, K. N. *J. Am. Chem. Soc.* **2014**, *136*, 15798. (b) Dubrovskiy, A. V.; Larock, R. C. *Org. Lett.* **2010**, *12*, 1180. (c) Łączkowski, K. Z.; Garcia, D.; Peña, D.; Cobas, A.; Pérez, D.; Guitián, E. *Org. Lett.* **2011**, *13*, 960. (d) Yoshida, H.; Yoshida, R.; Takaki, K. *Angew. Chem. Int. Ed.* **2013**, *52*, 8629. (e) Zeng, Y.; Hu, J. *Org. Lett.* **2016**, *18*, 856. (f) Zeng, Y.; Zhang, L.; Zhao, Y.; Ni, C.; Zhao, J.; Hu, J. *J. Am. Chem. Soc.* **2013**, *135*, 2955. (g) Chen, Q.; Yan, X.-X.; Du, Z.-Y.; Zhang, K.; Wen, C.-X. *J. Org. Chem.* **2016**, *81*, 276. (h) Hiroto, Y.; Junnai, I.; Miwa, S.; Joji, O.; Kunai, A. *J. Am. Chem. Soc.* **2003**, *125*, 6638. (i) Yoshida, H.; Sugiura, S.; Kunai, A. *Org. Lett.* **2002**, *4*, 2767. (j) Mesgar, M.; Daugulis, O. *Org. Lett.* **2017**, *19*, 4247. (k) Sakai, H.; Kubota, T.; Yuasa, J.; Araki, Y.; Sakanoue, T.; Takenobu, T.; Wada, T.; Kawai, T.; Hasobe, T. *J. Phys. Chem. C* **2016**, *120*, 7860. (l) Ikawa, T.; Masuda, S.; Takagi, A.; Akai, S. *Chem. Sci.* **2016**, *7*, 5206. (m) Alonso, J. M.; Díaz-Álvarez, A. E.; Criado, A.; Perez, D.; Peña, D.; Guitián, E. *Angew. Chem., Int. Ed.* **2012**, *51*, 173. (n) Rodríguez-Lojo, D.; Peña, D.; Pérez, D.; Guitián, E. *Synlett* **2015**, *26*, 1633–1637. (o) Moreira, B. V.; Muraca, A. C. A.; Raminelli, C. *Synthesis* **2017**, *49*, 1093. (p) Hendrick, C. E.; Wang, Q. *J. Org. Chem.* **2015**, *80*, 1059. (q) Mesgar, M.; Daugulis, O. *Org. Lett.* **2017**, *19*, 4247.

### Preparation of 4'-fluoro-3-(trimethylsilyl)-[1,1'-biphenyl]-4-yl trifluoromethanesulfonate (**1i**):

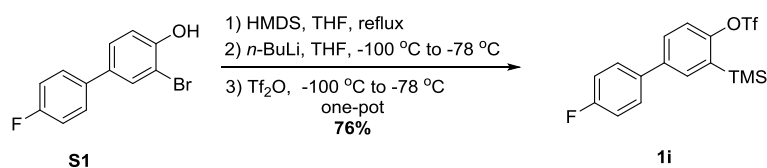

A mixture of ortho-bromohydroxyarene **1i** (1.16 g, 4.36 mmol) and HMDS (1.26 ml, 6.10 mmol) in THF (4 ml) was refluxed for 3h. The solvent was evaporated under reduced pressure and the residue was subjected to vacuum to remove excess NH<sub>3</sub> and unreacted HMDS. After <sup>1</sup>H NMR confirmation of the quantitative formation of the corresponding silyl ether, the crude product was dissolved in THF (30 ml), the solution was cooled to -100 °C and *n*-BuLi (1.6 M in hexane, 3.0 ml, 4.8 mmol) was added drop wise. The mixture was stirred for 20 min while the temperature reached to -78 °C. Then the mixture was again cooled to -100 °C, Tf<sub>2</sub>O (0.88 ml, 5.23 mmol) was added drop wise and stirring was continued for 20 min while the temperature reached to -78 °C. Cold sat. aq. NaHCO<sub>3</sub> was added, the phases were separated and the aqueous layer was extracted with Et<sub>2</sub>O. The combined organic layers were dried with Na<sub>2</sub>SO<sub>4</sub>. Filtered and concentrated under reduced pressure. Purification of the residue by column chromatography afforded silyl triflate **1i** (1.28 g, 3.27 mmol, 76% yield). R<sub>f</sub> = 0.8 (hexane : EtOAc = 8:1). <sup>1</sup>H NMR (500 MHz, CDCl<sub>3</sub>): δ 7.67 (s, 1H), 7.58 (d, *J* = 8.5 Hz, 1H), 7.54-7.51 (m, 2H), 7.52 (d, *J* = 8.5 Hz, 1H), 7.16 (t, *J* = 8.5 Hz, 2H), 0.44 (s, 9H) ppm. <sup>13</sup>C NMR (126 MHz, CDCl<sub>3</sub>): δ 162.9 (d, *J*<sub>C-F</sub> = 249.9 Hz), 154.6, 139.8, 136.0 (d, *J*<sub>C-F</sub> = 3.3 Hz), 134.9, 133.3, 129.9, 129.0 (d, *J*<sub>C-F</sub> = 8.1 Hz), 120.0, 118.7 (q, *J*<sub>C-F</sub> = 320.7 Hz), 116.0 (d, *J*<sub>C-F</sub> = 21.5 Hz), -0.686 ppm. <sup>19</sup>F NMR (470 MHz, CDCl<sub>3</sub>): δ -74.93 (s, 3F), -115.6 (m, 1F) ppm. HRMS *m/z* (APCI): calcd. for C<sub>16</sub>H<sub>16</sub>F<sub>4</sub>O<sub>3</sub>SSi [M]<sup>+</sup>: 392.0520; found: 392.0524.

### Preparation of 5-bromo-4-methoxy-2-(trimethylsilyl)phenyl trifluoromethanesulfonate (**1q**):

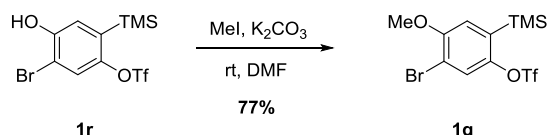

Under argon, to a 10 mL round-bottom flask equipped with a magnetic stir bar was added **1r** (412 mg, 1.05 mmol), iodomethane (231 mg, 1.63 mmol) and DMF (2.1 mL), then K<sub>2</sub>CO<sub>3</sub> (225 mg, 1.63mmol) was added in one portion and the reaction system was stirred at room temperature for 3 h, then quenched by adding water, extracted with ether for three times. The organic layers were combined, washed with water then brine, dried over anhydrous Na<sub>2</sub>SO<sub>4</sub>. Filtered and concentrated by rotary evaporator. The crude product was purified by flash column chromatography on silica gel to afford **1q** (330 mg, 0.81 mmol, 77% yield). R<sub>f</sub> = 0.6 (hexane : EtOAc = 8:1). <sup>1</sup>H NMR (400 MHz, CDCl<sub>3</sub>): δ 7.50 (s, 1H), 6.95 (m, 2H), 3.92 (s, 3H), 0.37 (s, 9H) ppm. <sup>13</sup>C NMR (101 MHz, CDCl<sub>3</sub>): δ 155.1, 147.6, 133.5, 125.1, 118.6 (q, *J*<sub>C-F</sub> = 321.3 Hz), 117.4, 113.4, 56.7, -0.772 ppm. <sup>19</sup>F NMR (376 MHz, CDCl<sub>3</sub>): δ -74.89 (s, 3F) ppm. HRMS *m/z* (APCI): calcd. for C<sub>11</sub>H<sub>14</sub>BrF<sub>3</sub>O<sub>4</sub>SSi [M]<sup>+</sup>: 407.9492; found: 407.9493.

**Preparation of 1,4-dibutyl-7-(trimethylsilyl)-1,4-dihydro-1,4-epoxynaphthalen-6-yl trifluoromethanesulfonate (1t):**

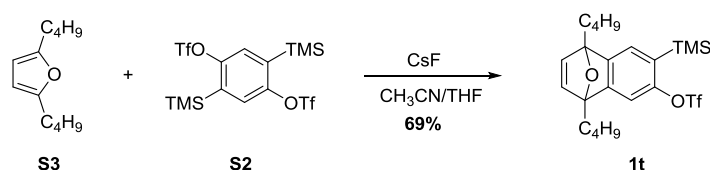

Under argon, CsF (456 mg, 3.0 mmol) was added to a solution of **S3** (504 mg, 1.4 mmol) and **S2** (1.04 g, 2.0 mmol) in dry CH<sub>3</sub>CN (20 mL) and THF (20 mL), the mixture was stirred at room temperature, monitored by TLC. After completion, the system was diluted with EA, passed through a short pad, evaporated the solvent and the residue was purified by flash column chromatography on silica gel to afford **1t** (570 mg, 1.2 mmol, 60% yield),  $R_f = 0.2$  (hexane : CH<sub>2</sub>Cl<sub>2</sub> = 8:1). <sup>1</sup>H NMR (500 MHz, CDCl<sub>3</sub>):  $\delta$  7.15 (s, 1H), 7.06 (m, 1H), 6.78 (q,  $J = 5.8$  Hz, 2H), 2.54-2.24 (m, 2H), 2.22-2.15 (m, 2H), 1.66-1.52 (m, 4H), 1.52-1.43 (m, 4H), 0.98 (q,  $J = 6.8$  Hz, 6H), 0.34 (s, 9H) ppm. <sup>13</sup>C NMR (126 MHz, CDCl<sub>3</sub>):  $\delta$  157.7, 152.5, 151.8, 146.1, 145.6, 127.7, 124.6, 118.6 (q,  $J_{C-F} = 320.7$  Hz), 111.7, 92.0, 91.9, 29.0, 28.9, 27.0, 26.9, 23.3, 23.2, 14.2, 14.1, -0.582 ppm. <sup>19</sup>F NMR (471 MHz, CDCl<sub>3</sub>):  $\delta$  -75.06 (s, 3F) ppm. HRMS  $m/z$  (APCI): calcd. for C<sub>22</sub>H<sub>31</sub>F<sub>3</sub>O<sub>4</sub>SSi [M]<sup>+</sup>: 477.1737; found: 477.1732.

**Preparation of 9,10-diphenyl-3-(trimethylsilyl)-9,10-dihydro-9,10-epoxyanthracen-2-yl trifluoromethanesulfonate (1u):**

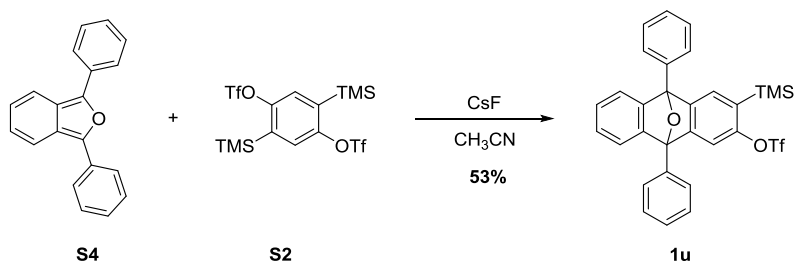

Under argon, CsF (456 mg, 3.0 mmol) was added to a solution of **S4** (810 mg, 3.0 mmol) and **S2** (1.04 g, 2.0 mmol) in dry CH<sub>3</sub>CN (20 mL), the mixture was stirred at room temperature, monitored by TLC. After completion, the system was diluted with EA, passed through a short pad, evaporated the solvent and the residue was purified by flash column chromatography on silica gel to afford **1u** (600 mg, 1.06 mmol, 53% yield),  $R_f = 0.3$  (hexane : CH<sub>2</sub>Cl<sub>2</sub> = 4:1). <sup>1</sup>H NMR (500 MHz, CDCl<sub>3</sub>):  $\delta$  7.96-7.91 (m, 4H), 7.69-7.61 (m, 4H), 7.59-7.51 (m, 2H), 7.49 (s, 1H), 7.43 (s, 2H), 7.37 (s, 1H), 7.12 (s, 2H), 0.33 (s, 9H) ppm. <sup>13</sup>C NMR (126 MHz, CDCl<sub>3</sub>):  $\delta$  155.0, 153.0, 149.9, 149.6, 149.5, 134.4, 134.0, 129.8, 129.1, 129.1, 128.9, 128.7, 126.8, 126.7, 126.7, 126.4, 126.4, 121.1, 120.8, 118.5 (q,  $J_{C-F} = 320.5$  Hz), 113.0, 90.7, 90.6, -0.743 ppm. <sup>19</sup>F NMR (471 MHz, CDCl<sub>3</sub>):  $\delta$  -75.08 (s, 3F) ppm. HRMS  $m/z$  (APCI): calcd. for C<sub>30</sub>H<sub>25</sub>F<sub>3</sub>O<sub>4</sub>SSi [M]<sup>+</sup>: 567.1268; found: 567.1264.

**Preparation of 1,2-bis(trifluoromethylation) estrone derivative **2w** (cf. Scheme 3).**

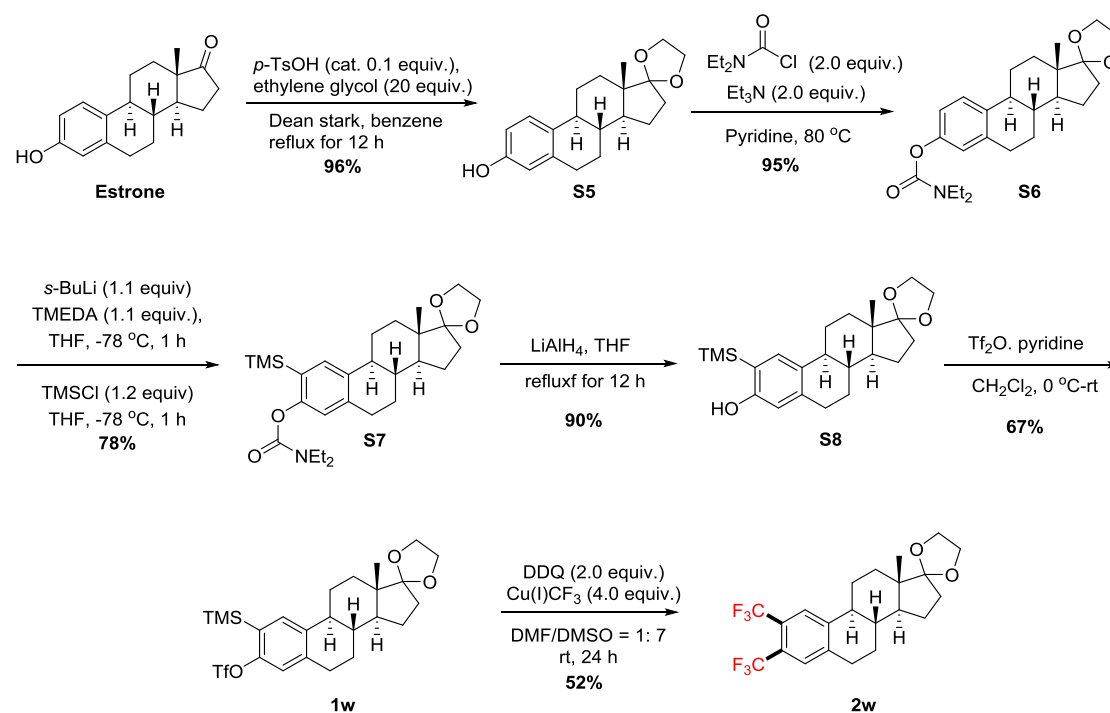

**Solvent screening for the 1,2-bis(trifluoromethylation) of **1w**.<sup>a</sup>**

| entry          | solvent (DMF : DMSO) | yield of <b>2w</b> <sup>b</sup> |
|----------------|----------------------|---------------------------------|
| 1              | 1:1                  | 9%                              |
| 2              | 1:2                  | 34%                             |
| 3              | 1:3                  | 44%                             |
| 4              | 1:5                  | 62%                             |
| 5 <sup>c</sup> | 1:7                  | 66%                             |

<sup>a</sup>General condition: **1w** (0.1 mmol), DDQ (0.2 mmol), [CuCF<sub>3</sub>] (0.4 mmol 1.0 mL in DMF). <sup>b</sup>Determined by <sup>19</sup>F NMR analysis using benotrifluoride as the internal standard. <sup>c</sup>DMF/ DMSO = 1.0 : 7.0 mL.

A mixture of estrone (1.28 g, 4.74 mmol), *p*-TsOH·H<sub>2</sub>O (74.2 mg, 0.43 mmol), and ethylene glycol (5.30 mL, 94.8 mmol) in benzene (33 mL) was stirred under refluxing conditions in a Dean–Stark device for overnight. After cooling to room temperature, the mixture was poured into H<sub>2</sub>O (65 mL) and extracted with CH<sub>2</sub>Cl<sub>2</sub>. The combined organic extracts were washed with H<sub>2</sub>O and brine then dried over Na<sub>2</sub>SO<sub>4</sub>. The solvent was evaporated and the residue was purified by flash chromatography on silica gel (hexane–EtOAc, 2:1) to afforded **S5** as a colorless solid (1.43 g, 4.55 mmol, 96% yield). R<sub>f</sub> = 0.4 (hexane : EtOAc = 2:1).<sup>24</sup>

To a solution of **S5** (1.43 g, 4.55 mmol) in anhydrous pyridine (18 mL) was added diethylcarbamoyl chloride (1.15 mL, 9.10 mmol) and Et<sub>3</sub>N (1.27 mL, 9.10 mmol) in one portion. The mixture was stirred at 80 °C overnight and then cooled to r.t. H<sub>2</sub>O (100 mL) was added, the mixture was stirred for 30 min, and extracted with EtOAc. The combined organic phases were washed with H<sub>2</sub>O and aq 1 M HCl for 5 times separately, then washed with brine, dried over Na<sub>2</sub>SO<sub>4</sub>. Filtered and the solvent was evaporated and the residue was purified by flash chromatography on silica gel (hexane–EtOAc, 2:1) to afforded **S6**

(1.79 g, 4.32 mmol, 95% yield).  $R_f = 0.5$  (hexane : EtOAc = 2:1).<sup>2a</sup>

Under argon, a solution of carbamate **S6** (1.79 g, 4.33 mmol) in THF (15 mL) was added via a syringe to a stirred solution of *s*-BuLi (3.67 mL of 1.3 M solution in cyclohexane, 4.77 mmol) and TMEDA (715  $\mu$ L, 0.165 mmol) in THF (30 mL) at  $-78^\circ\text{C}$ . The resulting greenish solution was stirred at  $-78^\circ\text{C}$  for 1 h, treated dropwise via a syringe with a solution of an TMSCl (607  $\mu$ L, 4.77 mmol) in THF (15 mL), stirred at this temperature for 1 h, and then the reaction mixture was allowed to warm to r.t. The mixture was hydrolyzed with sat. aq  $\text{NH}_4\text{Cl}$  and extracted with EtOAc. The combined organic extracts were washed with brine and dried over  $\text{Na}_2\text{SO}_4$ . Filtered and concentration under reduced pressure then the residue was directly purified by flash chromatography on the silica gel using hexane–EtOAc as an eluent afforded the product **S7** (1.63 g, 3.37 mmol, 78% yield.).  $R_f = 0.5$  (hexane : EtOAc = 4:1).<sup>2a</sup>

Under argon, a solution of **S7** (1.63 g, 3.37 mmol) in anhydrous THF (14 mL) was added at  $0^\circ\text{C}$  to a stirred suspension of  $\text{LiAlH}_4$  (640 mg, 16.9 mmol) in anhydrous THF (20 mL). After stirring under refluxing conditions for 24h, the mixture was cooled to r.t. and treated with  $\text{H}_2\text{O}$  (0.64 mL), 15% aq  $\text{NaOH}$  (0.64 mL), and  $\text{H}_2\text{O}$  (1.90 mL). After stirring for 10 min, the precipitate formed was filtered off and washed on the filter with EtOAc. The combined organic phases were dried over  $\text{Na}_2\text{SO}_4$ . Filtered and concentration under vacuum then the residue was directly purified by flash chromatography of the residue on silica gel afforded **S8** (1.17 g, 3.03 mmol, 90% yield).  $R_f = 0.5$  (hexane : EtOAc = 5:1).<sup>2a</sup>

Under argon, to a solution of **S8** (1.16 g, 3.00 mmol) and pyridine (0.36 mL, 4.5 mmol) in  $\text{CH}_2\text{Cl}_2$  (12 mL) was slowly added  $\text{Tf}_2\text{O}$  (0.76 mL, 4.5 mmol) at  $0^\circ\text{C}$ , stirred for 1 h and additional 30 mins at room temperature, quenched by sat. aq  $\text{NaHCO}_3$ , extracted with  $\text{Et}_2\text{O}$ , the combined organic layer was washed with  $\text{H}_2\text{O}$ , brine then dried over  $\text{Na}_2\text{SO}_4$ . Filtered and concentration under vacuum then the residue was directly purified by flash chromatography of the residue on silica gel afforded **1w** (1.07 g, 2.00 mmol, 67% yield).  $R_f = 0.6$  (hexane : EtOAc = 5:1).<sup>3</sup>  **$^1\text{H NMR}$**  (400 MHz,  $\text{CDCl}_3$ ):  $\delta$  7.42 (s, 1H), 7.02 (s, 1H), 3.97-3.91 (m, 4H), 2.87 (s, 2H), 2.36-2.27 (m, 2H), 2.04 (s, 1H), 1.94-1.77 (s, 4H), 1.65-1.26 (m, 6H), 0.890 (s, 3H), 0.345 (s, 9H) ppm.  **$^{13}\text{C NMR}$**  (126 MHz,  $\text{CDCl}_3$ ):  $\delta$  153.2, 141.0, 139.9, 133.3, 128.7, 119.6, 119.4, 118.6 (q,  $J_{\text{C-F}} = 320.0$  Hz), 65.4, 64.7, 49.5, 46.2, 44.0, 38.8, 34.3, 30.7, 29.8, 26.7, 26.0, 22.5, 14.4, -0.584 ppm. The spectral data are in full accordance with the literature report.<sup>2a</sup>

Under argon, to a 50 mL round-bottom flask equipped with a magnetic stir bar was added **1w** (207 mg, 0.4 mmol), DDQ (181.6 mg, 0.8 mmol) and DMSO (28 mL). A solution of  $[\text{CuCF}_3]$  in DMF (4.0 mL, 1.6 mmol) was added dropwise to the above mixture under argon at  $0^\circ\text{C}$ . The reaction mixture was warmed up to room temperature and stirred under argon for 24 h, then quenched with saturated  $\text{NaHCO}_3$  aqueous solution then neutralized with 1 M  $\text{HCl}$ , extracted with diethyl ether for three times. The organic layers were combined, washed with water then brine, dried over anhydrous  $\text{Na}_2\text{SO}_4$ , filtered and concentrated by rotary evaporator. The crude product was purified by preparative TLC to afford **2w** (90.2 mg, 0.21 mmol, 52%).  $R_f = 0.4$  (hexane : acetone = 12:1).  **$^1\text{H NMR}$**  (500 MHz,  $\text{CDCl}_3$ ):  $\delta$  7.72 (s, 1H), 7.52 (s, 1H), 3.99-3.90 (m, 4H), 2.98-2.89 (m, 2H), 2.39-2.30 (m, 2H), 2.07-1.96 (m, 2H), 1.89-1.76 (m, 3H), 1.69-1.49 (m, 3H), 1.48-1.31 (m, 3H), 0.89 (s, 3H) ppm.  **$^{13}\text{C NMR}$**  (126 MHz,  $\text{CDCl}_3$ ):  $\delta$  145.0, 141.6, 128.6 (q,  $J_{\text{C-F}} = 3.5$  Hz), 125.3 (m), 125.1 (q,  $J_{\text{C-F}} = 32.6$  Hz), 123.4 (q,  $J_{\text{C-F}} = 274.8$  Hz), 123.2 (q,  $J_{\text{C-F}} = 274.2$  Hz), 119.3, 65.4 (m), 64.7(m), 49.4, 46.1, 44.1, 38.4, 34.3, 30.6, 29.4, 26.4, 25.8, 22.4, 14.4 (q,  $J_{\text{C-F}} = 2.1$  Hz) ppm (one carbon missing due to overlap).  **$^{19}\text{F NMR}$**  (471 MHz,  $\text{CDCl}_3$ ):  $\delta$  -60.18 (q,  $J_{\text{F-F}} = 12.2$  Hz, 3F), -60.39 (q,  $J_{\text{F-F}} = 12.2$  Hz, 3F) ppm. **HRMS  $m/z$  (APCI)**: calcd. for  $\text{C}_{22}\text{H}_{25}\text{F}_6\text{O}_2$   $[\text{M}+\text{H}]^+$ : 435.1753; found: 435.1752.

### Preparation of compound **3** (cf. Scheme 4a).

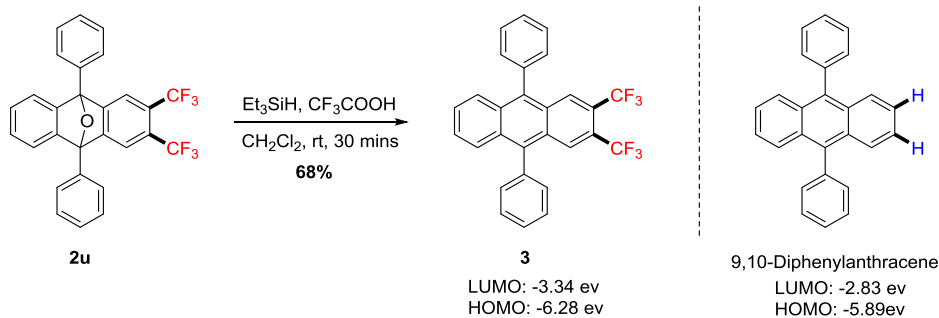

A glass vial equipped with a magnetic stir bar and a cap was charged with **2u** (96.4 mg, 0.2 mmol), wet  $\text{CH}_2\text{Cl}_2$  (0.4 mL),  $\text{Et}_3\text{SiH}$  (48  $\mu\text{L}$ , 0.3 mmol),  $\text{CF}_3\text{COOH}$  (20  $\mu\text{L}$ , 0.3 mmol), then the vial was sealed and stirred at room temperature for 3 h, after completion, quenched by adding water, extracted with  $\text{Et}_2\text{O}$  for 3 times, the combined organic phase was washed with  $\text{H}_2\text{O}$ , brine then dried over  $\text{Na}_2\text{SO}_4$ . Filtered and concentrated under reduced pressure. Purification of the residue by column chromatography afforded **3** (63.5 mg, 0.2 mmol, 68% yield).  $R_f = 0.7$  (hexane :  $\text{CH}_2\text{Cl}_2 = 5:1$ ).  $^1\text{H NMR}$  (400 MHz,  $\text{CDCl}_3$ ):  $\delta$  8.32 (s, 2H), 7.85 (dd,  $J = 6.4$  Hz,  $J = 2.8$  Hz, 2H), 7.72-7.63 (m, 6H), 7.52-7.50 (m, 6H) ppm.  $^{13}\text{C NMR}$  (101 MHz,  $\text{CDCl}_3$ ):  $\delta$  139.6, 137.2, 132.1, 131.2, 129.4, 129.0, 128.6, 128.3, 127.5, 127.1, 123.4 (q,  $J_{\text{C-F}} = 277.0$  Hz), 122.4 (m) ppm.  $^{19}\text{F NMR}$  (376 MHz,  $\text{CDCl}_3$ ):  $\delta$  -60.43 (s, 6F) ppm. HRMS  $m/z$  (EI): calcd. for  $\text{C}_{28}\text{H}_{16}\text{F}_6$   $[\text{M}]^+$ : 466.1151; found: 466.1152.

### Cyclic Voltammetry (CV):

Cyclic voltammetry was performed in a solution in  $\text{CH}_2\text{Cl}_2$  on a PAR Potentiostat/Galvanostat Model 263A Electrochemical Station (Princeton Applied Research). The solution contained 0.1 M  $\text{Bu}_4\text{NPF}_6$  as the supporting electrolyte. A platinum bead was used as a working electrode, a platinum wire was used as an auxiliary electrode, and a silver wire was used as a pseudo-reference. Ferrocene/ferrocenium was used as the internal standard. Potentials were referenced to ferrocenium/ferrocene ( $\text{FeCp}_2^+/\text{FeCp}_2^0$ ).

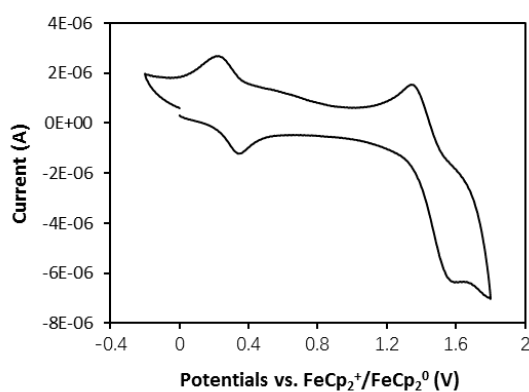

Figure 1: Cyclic voltammogram of **3**



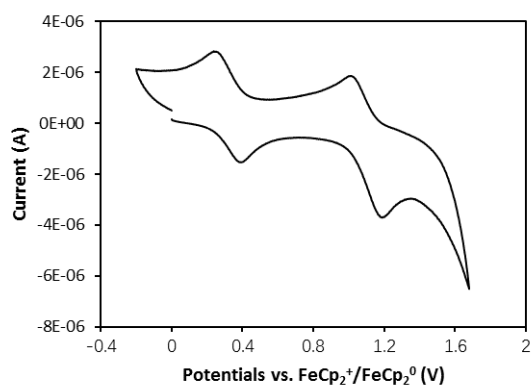

**Figure 2:** Cyclic voltammogram of 9,10-diphenylanthracene

**UV-Vis absorption spectra (recorded on a Varian CARY 1E UV-vis spectrophotometer):**

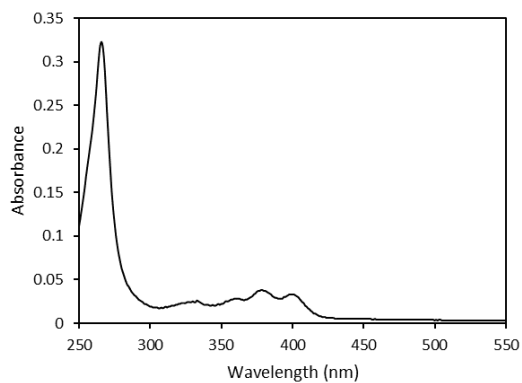

**Figure 3:** Absorption spectra of **3**

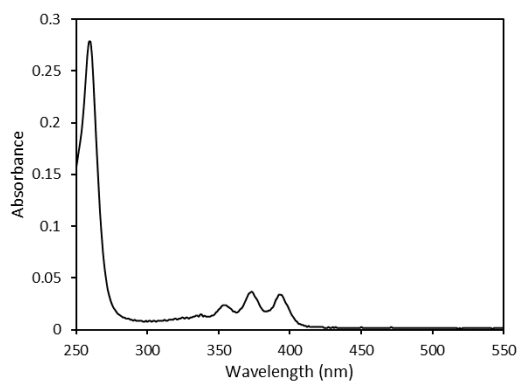

**Figure 4:** Absorption spectra of 9,10-diphenylanthracene

**Summary of electrochemical potentials and energy levels of LUMO and HOMO**

| Compound                | $E_{\text{ox}}$ vs $\text{Fc}^+/\text{Fc}$ (V) <sup>a</sup> | HOMO-LUMO Gap <sup>b</sup> | HOMO (eV) <sup>c</sup> | LUMO (eV) <sup>d</sup> |
|-------------------------|-------------------------------------------------------------|----------------------------|------------------------|------------------------|
| <b>3</b>                | 1.18                                                        | 422 nm / 2.94              | -6.28                  | -3.34                  |
| 9,10-diphenylanthracene | 0.79                                                        | 405 nm / 3.06              | -5.89                  | -2.83                  |

<sup>a</sup>Half-wave potential versus ferrocenium/ferrocene for the oxidation wave. <sup>b</sup> $\lambda_{\text{max}}$  of the longest-

wavelength absorption in the UV-vis absorption spectrum from a solution in dichloromethane. <sup>e</sup>Estimated from HOMO = -5.10 - E<sub>ox</sub> (eV). <sup>d</sup>Calculated from the HOMO-LUMO gap and the HOMO energy level.<sup>4</sup>

#### Preparation of compound 4 and 5 (cf. Scheme 4b & 4c).

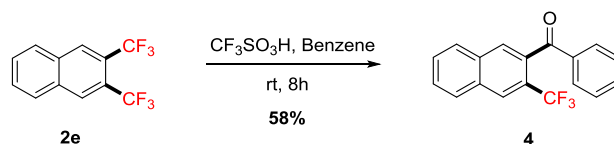

Under argon, to a solution of **2e** (52.8 mg, 0.2 mmol) in dry C<sub>6</sub>D<sub>6</sub> (0.4 mL) was added CF<sub>3</sub>SO<sub>3</sub>H (0.4 mL) was added, the mixture was stirred at room temperature for 6 hours, after which it was poured over several grams of ice, extracted with CH<sub>2</sub>Cl<sub>2</sub> for 3 times, washed with water and brine, dried over Na<sub>2</sub>SO<sub>4</sub>. Filtered and concentrated under reduced pressure. Purification of the residue by column chromatography afforded **4** (35 mg, 0.12 mmol, 58% yield). R<sub>f</sub> = 0.3 (hexane : EtOAc = 8:1). <sup>1</sup>H NMR (500 MHz, CDCl<sub>3</sub>): δ 8.33 (s, 1H), 8.00 (dd, *J* = 6.0 Hz, *J* = 3.5 Hz, 1H), 7.88-7.86 (m, 4H), 7.68 (dd, *J* = 3.5 Hz, 2H), 7.62 (t, *J* = 7.5 Hz, 1H), 7.48 (t, *J* = 7.5 Hz, 2H) ppm. <sup>13</sup>C NMR (126 MHz, CDCl<sub>3</sub>): δ 195.6, 137.0, 134.3, 133.8, 133.3, 132.5, 130.5 (q, *J*<sub>C-F</sub> = 6.8 Hz), 129.3, 129.2, 129.1, 128.9 (q, *J*<sub>C-F</sub> = 6.6 Hz), 128.6, 128.3 (q, *J*<sub>C-F</sub> = 6.3 Hz), 128.0 (m), 125.8 (q, *J*<sub>C-F</sub> = 32.4 Hz), 123.9 (q, *J*<sub>C-F</sub> = 274.2 Hz) ppm. <sup>19</sup>F NMR (470 MHz, CDCl<sub>3</sub>): δ -58.52 (s, 3F) ppm. HRMS *m/z* (APCI): calcd. for C<sub>18</sub>H<sub>12</sub>F<sub>3</sub>O [M+H]<sup>+</sup>: 301.0833; found: 301.0835.

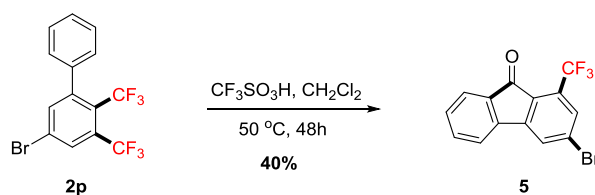

Under argon, a glass vial equipped with a magnetic stir bar was charged with **2p** (44.0 mg, 0.12 mmol), CH<sub>2</sub>Cl<sub>2</sub> (0.4 mL), then CF<sub>3</sub>SO<sub>3</sub>H (106 μL, 1.2 mmol) was added, the vial was sealed and the mixture was heated at 50 °C for 48 hours, then cooled to room temperature, quenched with sat. aq. NaHCO<sub>3</sub>, extracted with CH<sub>2</sub>Cl<sub>2</sub> for 3 times, washed with water and brine, dried over Na<sub>2</sub>SO<sub>4</sub>. Filtered and concentrated under reduced pressure. Purification of the residue by column chromatography afforded **5** (18.1 mg, 0.056 mmol, 40% yield). R<sub>f</sub> = 0.4 (hexane : EtOAc = 5:1). <sup>1</sup>H NMR (400 MHz, CDCl<sub>3</sub>): δ 7.87 (s, 1H), 7.72-7.70 (m, 2H), 7.55 (q, *J* = 6.7 Hz, 1H), 7.54 (s, 1H), 7.40 (dt, *J* = 7.0 Hz, *J* = 2.0 Hz, 1H) ppm. <sup>13</sup>C NMR (101 MHz, CDCl<sub>3</sub>): δ 188.9, 148.2, 141.8, 135.2, 134.8, 133.6, 130.8, 129.4, 129.2 (q, *J*<sub>C-F</sub> = 35.8 Hz), 129.1 (q, *J*<sub>C-F</sub> = 23.6 Hz), 127.0, 125.9, 121.7 (q, *J*<sub>C-F</sub> = 275.7 Hz), 120.7 ppm. <sup>19</sup>F NMR (376 MHz, CDCl<sub>3</sub>): δ -62.90 (s, 3F) ppm. HRMS *m/z* (APCI): calcd. for C<sub>14</sub>H<sub>7</sub>BrF<sub>3</sub>O [M+H]<sup>+</sup>: 326.9626; found: 326.9627.

#### Preparation of compound 6 (cf. Scheme 4d).

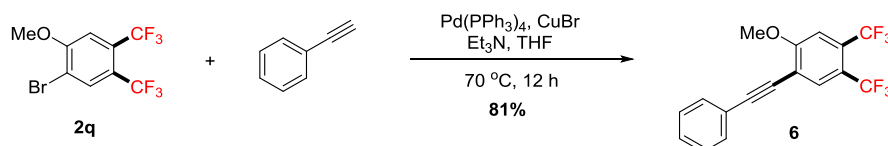

Under argon, a schlenk tube equipped with a magnetic stir bar was charged with Pd(PPh<sub>3</sub>)<sub>4</sub> (2.2 mg,

0.0019 mmol), CuBr (0.5 mg, 0.0038 mmol), then THF (0.2 mL) was added and the suspension was stirred for 5 mins followed by addition of **2q** (30.0 mg, 0.093 mmol) and Et<sub>3</sub>N (0.14 mL), after 5 mins more stirring, phenylacetylene (12.3 μL, 0.11 mmol) was added. The reaction system was cooled to -78 °C, pumped and refilled with argon for 3 times, after which the tube was sealed and heated at 70 °C for 12 h. The solution was cooled to room temperature, filtered through a layer of celite on top of silica and eluted with diethyl ether. The solvent was removed in vacuo and the crude material was purified via column chromatography to yield **6** (26.0 mg, 0.076 mmol, 81% yield). R<sub>f</sub> = 0.5 (hexane : CH<sub>2</sub>Cl<sub>2</sub> = 8:1). **<sup>1</sup>H NMR** (500 MHz, CDCl<sub>3</sub>): δ 7.94 (s, 2H), 7.59-7.58 (m, 2H), 7.39-7.38 (m, 3H), 7.29 (s, 1H) ppm. **<sup>13</sup>C NMR** (126 MHz, CDCl<sub>3</sub>): δ 161.8, 133.2 (q, *J*<sub>C-F</sub> = 6.0 Hz), 132.0, 129.2, 128.9 (q, *J*<sub>C-F</sub> = 35.5 Hz), 128.6, 122.8 (q, *J*<sub>C-F</sub> = 273.2 Hz), 122.6 (q, *J*<sub>C-F</sub> = 274.4 Hz), 122.5, 120.4 (q, *J*<sub>C-F</sub> = 33.4 Hz), 116.5, 110.2 (q, *J*<sub>C-F</sub> = 6.2 Hz), 97.2, 83.2, 56.6 ppm **<sup>19</sup>F NMR** (470 MHz, CDCl<sub>3</sub>): δ -59.52 (q, *J*<sub>F-F</sub> = 12.7 Hz, 3F), -60.47 (q, *J*<sub>F-F</sub> = 12.7 Hz, 3F) ppm. **HRMS m/z (EI)**: calcd. for C<sub>17</sub>H<sub>10</sub>F<sub>6</sub>O [M]<sup>+</sup>: 344.0530; found: 344.0630.

### Mechanistic studies:

**<sup>19</sup>F NMR experiment (cf. Scheme 5a).**

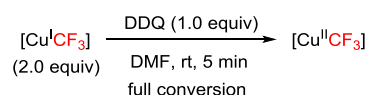

Under argon, to an NMR tube charged with DDQ (11.4 mg, 0.05 mmol) and freshly prepared [CuCF<sub>3</sub>] (0.1 mmol in 0.4 mL DMF) then sealed with a cap. The mixture was monitored by <sup>19</sup>F NMR using benzotrifluoride as the internal standard over 5 min at room temperature.

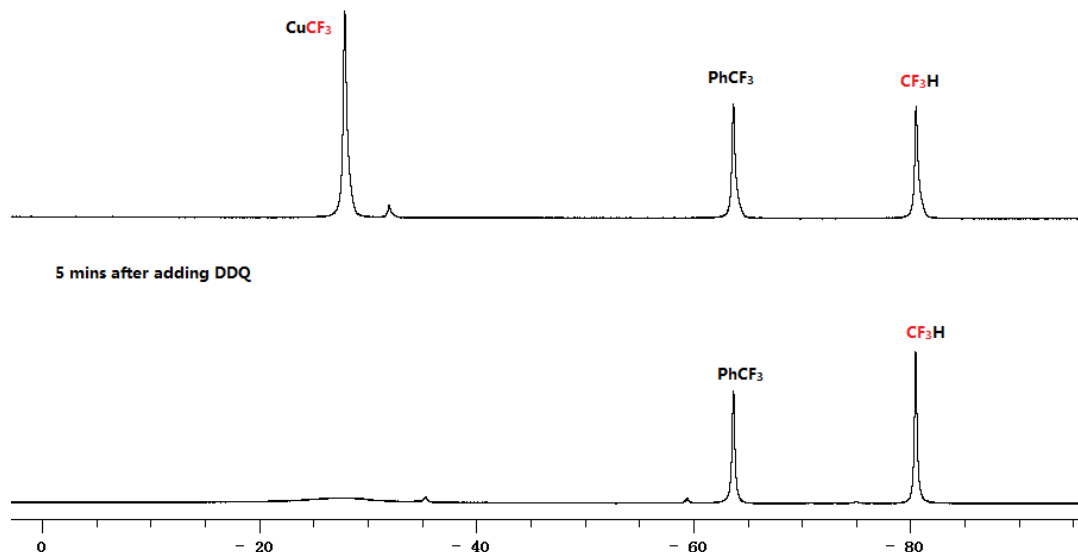

### Radical scavenger experiment (cf. Scheme 5c):

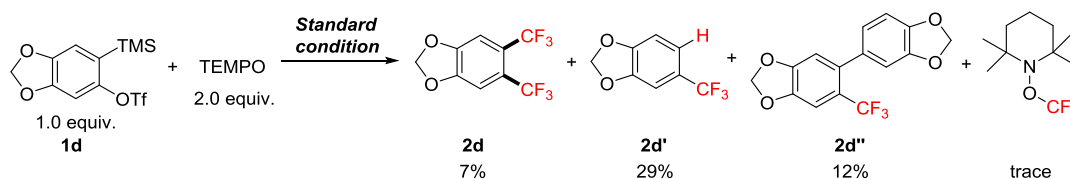

Under argon, to a glass tube equipped with a magnetic stir bar was added **1d** (34.2 mg, 0.1 mmol), DDQ (45.4 mg, 0.2 mmol), TEMPO (31.2 mg, 0.2 mmol) and DMSO (2.0 mL). A solution of [CuCF<sub>3</sub>]

in DMF (1.0 mL, 0.4 mmol) was added dropwise to the above mixture under argon at 0 °C. The reaction mixture was warmed up to room temperature and stirred under argon for 24 h. The crude yield of each product was analyzed by <sup>19</sup>F NMR using benzotrifluoride as the internal standard.

**Isolation of 2d**: quenched with saturated NaHCO<sub>3</sub> aqueous solution then neutralized with 1 M HCl, extracted with diethyl ether for three times. The organic layers were combined, washed with water then brine, dried over anhydrous Na<sub>2</sub>SO<sub>4</sub>, filtered and concentrated by rotary evaporator. The crude product was purified by flash column chromatography on silica gel to afford **2d**. R<sub>f</sub> = 0.3 (hexane : CH<sub>2</sub>Cl<sub>2</sub> = 10:1). **<sup>1</sup>H NMR** (500 MHz, CDCl<sub>3</sub>): δ 7.14 (s, 1H), 6.81 (d, *J* = 8.0 Hz, 1H), 6.77 (s, 1H), 6.75-6.71 (m, 2H), 6.07 (s, 2H), 6.00 (s, 2H) ppm. **<sup>13</sup>C NMR** (126 MHz, CDCl<sub>3</sub>): δ 149.6, 147.2, 147.1, 146.9, 136.4, 133.4, 124.1 (q, *J*<sub>C-F</sub> = 273.7 Hz), 122.8, 122.2 (q, *J*<sub>C-F</sub> = 30.4 Hz), 112.2, 110.0, 107.8, 106.5 (q, *J*<sub>C-F</sub> = 5.7 Hz), 102.2, 101.3 ppm. **<sup>19</sup>F NMR** (470 MHz, CDCl<sub>3</sub>): δ -56.32 (s, 3F) ppm. **HRMS m/z (EI)**: calcd. for C<sub>15</sub>H<sub>9</sub>F<sub>3</sub>O<sub>4</sub> [M]<sup>+</sup>: 310.0447; found: 310.0446.

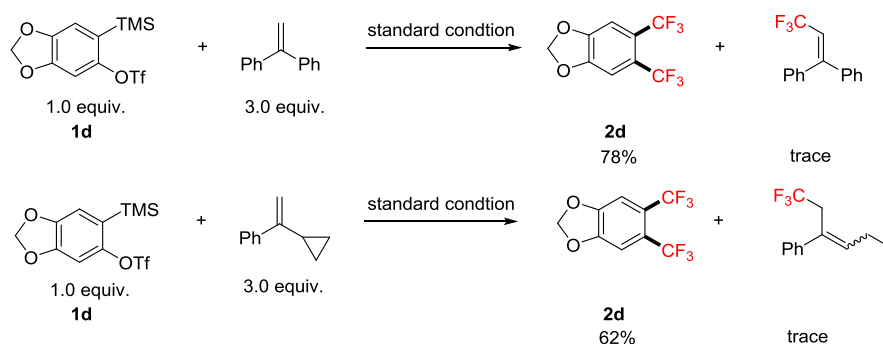

Under argon, to a glass tube equipped with a magnetic stir bar was added **1d** (34.2 mg, 0.1 mmol), DDQ (45.4 mg, 0.2 mmol), alkene (0.3 mmol) and DMSO (2.0 mL). A solution of [CuCF<sub>3</sub>] in DMF (1.0 mL, 0.4 mmol) was added dropwise to the above mixture under argon at 0 °C. The reaction mixture was warmed up to room temperature and stirred under argon for 24 h. The result was analyzed by <sup>19</sup>F NMR using benzotrifluoride as the internal standard.

#### Radical clock experiment (cf. Scheme 5d):

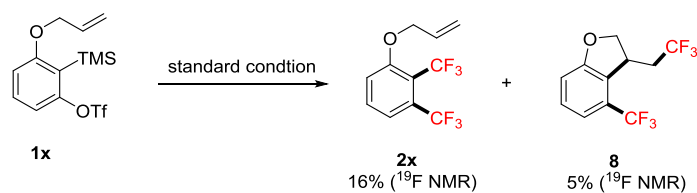

Under argon, to a 25 mL round-bottom flask equipped with a magnetic stir bar was added **1x** (141.6 mg, 0.4 mmol), DDQ (181.6 mg, 0.8 mmol) and DMSO (8.0 mL). A solution of [CuCF<sub>3</sub>] in DMF (4.0 mL, 1.6 mmol) was added dropwise to the above mixture under argon at 0 °C. The reaction mixture was warmed up to room temperature and stirred under argon for 24 h. The crude yield of each product was analyzed by <sup>19</sup>F NMR using benzotrifluoride as the internal standard. then quenched with saturated NaHCO<sub>3</sub> aqueous solution then neutralized with 1 M HCl, extracted with diethyl ether for three times. The organic layers were combined, washed with water then brine, dried over anhydrous Na<sub>2</sub>SO<sub>4</sub>, filtered and concentrated by rotary evaporator. The crude product was purified by flash column chromatography on silica gel to afford product **2x** and **8** (17.0 mg, 0.063 mmol) as inseparable mixture. R<sub>f</sub> = 0.4 (hexane : CH<sub>2</sub>Cl<sub>2</sub> = 8:1). **Compound 2x**: **<sup>1</sup>H NMR** (500 MHz, CDCl<sub>3</sub>): δ 7.56 (t, *J* = 8.0 Hz, 1H), 7.43 (d, *J* = 8.0

Hz, 1H), 7.24 (d,  $J = 8.5$  Hz, 1H), 6.07-5.99 (m, 2H), 5.48 (d,  $J = 17.0$  Hz, 1H), 5.33 (d,  $J = 10.5$  Hz, 1H), 4.67 (d,  $J = 4.5$  Hz, 2H) ppm.  $^{13}\text{C}$  NMR (126 MHz,  $\text{CDCl}_3$ ):  $\delta$  158.6 (q,  $J_{\text{C-F}} = 1.8$  Hz), 132.8, 131.9, 129.7 (q,  $J_{\text{C-F}} = 32.8$  Hz), 123.0 (q,  $J_{\text{C-F}} = 274.3$  Hz), 122.7 (q,  $J_{\text{C-F}} = 275.0$  Hz), 119.4 (q,  $J_{\text{C-F}} = 7.2$  Hz), 118.2, 118.1, 117.7 (q,  $J_{\text{C-F}} = 32.8$  Hz), 70.4 ppm  $^{19}\text{F}$  NMR (470 MHz,  $\text{CDCl}_3$ ):  $\delta$  -57.96 (q,  $J_{\text{F-F}} = 16.0$  Hz, 3F), -59.03 (q,  $J_{\text{F-F}} = 16.0$  Hz, 3F) ppm. **Compound 8:**  $^1\text{H}$  NMR (500 MHz,  $\text{CDCl}_3$ ):  $\delta$  7.30 (t,  $J = 8.0$  Hz, 1H), 7.16 (d,  $J = 7.5$  Hz, 1H), 7.02 (d,  $J = 8.0$  Hz, 1H), 4.63 (d,  $J = 9.5$  Hz, 1H), 4.55 (t,  $J = 8.5$  Hz, 1H), 3.97 (t,  $J = 9.3$  Hz, 1H), 2.54-2.33 (m, 2H) ppm.  $^{13}\text{C}$  NMR (126 MHz,  $\text{CDCl}_3$ ):  $\delta$  160.8, 130.0, 127.3 (q,  $J_{\text{C-F}} = 32.6$  Hz), 124.1 (q,  $J_{\text{C-F}} = 273.4$  Hz), 124.0 (q,  $J_{\text{C-F}} = 278.0$  Hz), 118.5 (q,  $J_{\text{C-F}} = 4.8$  Hz), 113.9, 76.2, 37.8 (q,  $J_{\text{C-F}} = 27.6$  Hz), 36.4, 30.5 ppm  $^{19}\text{F}$  NMR (470 MHz,  $\text{CDCl}_3$ ):  $\delta$  -61.25 (s, 3F), -65.90 (t,  $J = 10.8$  Hz, 3F) ppm. **HRMS  $m/z$  (EI):** calcd. for  $\text{C}_{11}\text{H}_8\text{F}_6\text{O}$   $[\text{M}]^+$ : 270.0474; found: 270.0473.

**Table S1:** Optimization Studies for 1,2-Bis(trifluoromethylation) of Aryne Precursor **1a**<sup>a</sup>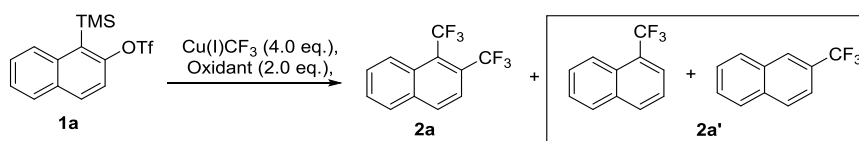

| entry           | oxidant                         | additive                       | solvent            | temp (°C) | yield (%) <sup>b</sup>              |
|-----------------|---------------------------------|--------------------------------|--------------------|-----------|-------------------------------------|
| 1 <sup>c</sup>  | air                             | none                           | DMF                | 50        | <b>2a</b> (30%), <b>2a'</b> (trace) |
| 2               | none                            | none                           | DMF                | 50        | <b>2a</b> (0%)                      |
| 3               | Cu(OAc) <sub>2</sub>            | none                           | DMF                | 50        | <b>2a</b> (7%), <b>2a'</b> (23%)    |
| 4               | Ag <sub>2</sub> CO <sub>3</sub> | none                           | DMF                | 50        | <b>2a</b> (9%), <b>2a'</b> (8%)     |
| 5               | AgOAc                           | none                           | DMF                | 50        | <b>2a</b> (26%), <b>2a'</b> (21%)   |
| 6               | BQ                              | none                           | DMF                | 50        | <b>2a</b> (4%), <b>2a'</b> (4%)     |
| 7               | PhI(OAc) <sub>2</sub>           | none                           | DMF                | 50        | <b>2a</b> (26%), <b>2a'</b> (29%)   |
| 8               | DDQ                             | none                           | DMF                | 50        | <b>2a</b> (58%), <b>2a'</b> (10%)   |
| 9               | DDQ                             | K <sub>2</sub> CO <sub>3</sub> | DMF                | 50        | <b>2a</b> (28%), <b>2a'</b> (20%)   |
| 10              | DDQ                             | 20 mg 4A MS                    | DMF                | 50        | <b>2a</b> (40%), <b>2a'</b> (34%)   |
| 11              | DDQ                             | 50 mg 4A MS                    | DMF                | 50        | <b>2a</b> (41%), <b>2a'</b> (29%)   |
| 12              | DDQ                             | 1.5 eq. TBAF 3H <sub>2</sub> O | DMF                | 50        | <b>2a</b> (50%), <b>2a'</b> (13%)   |
| 13 <sup>d</sup> | DDQ                             | none                           | DMF                | 50        | <b>2a</b> (50%), <b>2a'</b> (25%)   |
| 14 <sup>e</sup> | DDQ                             | none                           | DMF                | 50        | <b>2a</b> (26%), <b>2a'</b> (40%)   |
| 15 <sup>f</sup> | DDQ                             | none                           | DMF                | 50        | <b>2a</b> (51%), <b>2a'</b> (17%)   |
| 16 <sup>g</sup> | DDQ                             | none                           | DMF                | 50        | <b>2a</b> (39%), <b>2a'</b> (7%)    |
| 17 <sup>h</sup> | DDQ                             | none                           | DMF                | 50        | <b>2a</b> (46%), <b>2a'</b> (25%)   |
| 18 <sup>i</sup> | DDQ                             | none                           | DMF                | 50        | <b>2a</b> (28%), <b>2a'</b> (15%)   |
| 19              | DDQ                             | none                           | CH <sub>3</sub> CN | 50        | <b>2a</b> (19%), <b>2a'</b> (42%)   |
| 20              | DDQ                             | none                           | Dioxane            | 50        | <b>2a</b> (10%), <b>2a'</b> (60%)   |
| 21              | DDQ                             | none                           | Toluene            | 50        | <b>2a</b> (4.0%), <b>2a'</b> (39%)  |
| 22              | DDQ                             | none                           | NMP                | 50        | <b>2a</b> (56%), <b>2a'</b> (17%)   |
| 23 <sup>j</sup> | DDQ                             | none                           | DMSO               | 50        | <b>2a</b> (77%), <b>2a'</b> (trace) |
| 24 <sup>j</sup> | DDQ                             | none                           | DMSO               | rt        | <b>2a</b> (78%), <b>2a'</b> (5%)    |
| 25 <sup>k</sup> | DDQ                             | none                           | DMSO               | rt        | <b>2a</b> (62%), <b>2a'</b> (12%)   |
| 26 <sup>l</sup> | DDQ                             | none                           | DMSO               | rt        | <b>2a</b> (77%), <b>2a'</b> (trace) |

<sup>a</sup>Unless specified otherwise, reactions were carried out using **1a** (0.1 mmol), [CuCF<sub>3</sub>] (0.4 mmol in 1.0 mL DMF), oxidant (0.2 mmol) and DMF (1.0 mL). <sup>b</sup>Determined by <sup>19</sup>F NMR analysis using benotrifluoride as the internal standard. <sup>c</sup>Reaction was open to air. <sup>d</sup>[CuCF<sub>3</sub>] was stabilized with olah's

reagent. <sup>e</sup>[CuCF<sub>3</sub>] stabilized with Et<sub>3</sub>N HCl and extra 4.0 eq. KF; <sup>f</sup>Using 0.3 mmol [CuCF<sub>3</sub>]. <sup>g</sup>Using 0.1 mmol DDQ. <sup>h</sup>Using 0.3 mmol DDQ. <sup>i</sup>Using 0.4 mmol DDQ. <sup>j</sup>DMF/DMSO=1.0 : 1.0 mL. <sup>k</sup>DMF/DMSO=1.0 : 0.5 mL. <sup>l</sup>DMF/DMSO=1.0 : 2.0 mL. BQ = 1,4-Benzoquinone. DDQ = 2,3-Dichloro-5,6-Dicyanobenzoquinone.

### Characterization data:

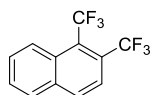

**2a: 1,2-bis(trifluoromethyl)naphthalene.** Prepared according to the general procedure. Reaction was run using **1a** (139.2 mg, 0.4 mmol), DDQ (181.6 mg, 0.8 mmol), DMSO (8.0 mL), [CuCF<sub>3</sub>] in DMF solution (4.0 mL, 1.6 mmol). The product was purified by flash column chromatography on silica gel (hexane) and obtained a colorless oil (0.31 mmol, 81.3 mg, 77%), R<sub>f</sub> = 0.60 (hexane). **<sup>1</sup>H NMR** (400 MHz, CDCl<sub>3</sub>): δ 8.37-8.34 (m, 1H), 8.07 (d, *J* = 8.8 Hz, 1H), 7.92-7.90 (m, 1H), 7.83 (d, *J* = 8.8 Hz, 1H), 7.70-7.64 (m, 2H) ppm. **<sup>13</sup>C NMR** (101 MHz, CDCl<sub>3</sub>): δ 135.2, 133.1, 130.1 (q, *J*<sub>C-F</sub> = 1.4 Hz), 128.7, 128.5, 127.3 (q, *J*<sub>C-F</sub> = 35.0 Hz), 126.2 (q, *J*<sub>C-F</sub> = 4.7 Hz), 125.9 (q, *J*<sub>C-F</sub> = 34.2 Hz), 123.7 (q, *J*<sub>C-F</sub> = 277.1 Hz), 123.7 (q, *J*<sub>C-F</sub> = 277.1 Hz), 123.5 (q, *J*<sub>C-F</sub> = 275.3 Hz), 122.2 (q, *J*<sub>C-F</sub> = 7.0 Hz) ppm. **<sup>19</sup>F NMR** (470 MHz, CDCl<sub>3</sub>): δ -53.70 (q, *J*<sub>F-F</sub> = 16.5 Hz, 3F), -57.65 (q, *J*<sub>F-F</sub> = 16.5 Hz, 3F) ppm. **HRMS m/z (APCI):** calcd. for C<sub>12</sub>H<sub>6</sub>F<sub>6</sub> [M]<sup>+</sup>: 264.0368; found: 264.0364.

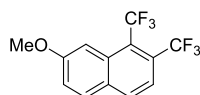

**2b: 7-methoxy-1,2-bis(trifluoromethyl)naphthalene.** Prepared according to the general procedure. Reaction was run using **1b** (151.2 mg, 0.4 mmol), DDQ (181.6 mg, 0.8 mmol), DMSO (8.0 mL), [CuCF<sub>3</sub>] in DMF solution (4.0 mL, 1.6 mmol). The product was purified by flash column chromatography on silica gel (hexane) and obtained a white solid (0.33 mmol, 96.4 mg, 82%), R<sub>f</sub> = 0.60 (hexane : CH<sub>2</sub>Cl<sub>2</sub> = 8 : 1). **<sup>1</sup>H NMR** (500 MHz, CDCl<sub>3</sub>): δ 7.97-7.93 (m, 1H), 7.79-7.75 (m, 1H), 7.67 (d, *J* = 8.5 Hz, 1H), 7.56 (s, 1H), 7.29 (d, *J* = 9.0 Hz, 1H) ppm. **<sup>13</sup>C NMR** (126 MHz, CDCl<sub>3</sub>): δ 159.4, 132.6 (q, *J*<sub>C-F</sub> = 7.9 Hz), 131.8, 131.0, 130.0 (q, *J*<sub>C-F</sub> = 7.3 Hz), 127.8 (q, *J*<sub>C-F</sub> = 33.0 Hz), 123.9 (q, *J*<sub>C-F</sub> = 32.3 Hz), 123.9 (q, *J*<sub>C-F</sub> = 276.3 Hz), 123.6 (q, *J*<sub>C-F</sub> = 274.9 Hz), 121.7, 120.0 (m), 104.4 (m), 55.4 (q, *J*<sub>C-F</sub> = 16.3 Hz) ppsm. **<sup>19</sup>F NMR** (470 MHz, CDCl<sub>3</sub>): δ -54.97 (q, *J*<sub>F-F</sub> = 16.9 Hz, 3F), -57.84 (q, *J*<sub>F-F</sub> = 16.9 Hz, 3F) ppm. **HRMS m/z (APCI):** calcd. for C<sub>13</sub>H<sub>9</sub>F<sub>6</sub>O [M+H]<sup>+</sup>: 295.0552; found: 295.0552.

**1 mmol scale reaction:** Prepared according to the general procedure. Reaction was run using **1b** (378 mg, 1.0 mmol), DDQ (548 mg, 2.0 mmol), DMSO (20.0 mL), [CuCF<sub>3</sub>] in DMF solution (10.0 mL, 4.0 mmol). The product was purified by flash column chromatography on silica gel (hexane) and obtained a white solid (0.67 mmol, 197 mg, 67%), R<sub>f</sub> = 0.60 (hexane : CH<sub>2</sub>Cl<sub>2</sub> = 8 : 1).

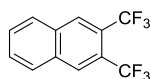

**2c: 2,3-bis(trifluoromethyl)naphthalene.** Prepared according to the general procedure. Reaction was run using **1c** (139.2 mg, 0.4 mmol), DDQ (181.6 mg, 0.8 mmol), DMSO (8.0 mL), [CuCF<sub>3</sub>] in DMF solution (4.0 mL, 1.6 mmol). The product was purified by flash column chromatography on silica gel (hexane) and obtained a colorless oil (0.25 mmol, 65.4 mg, 62%), R<sub>f</sub> = 0.60 (hexane). **<sup>1</sup>H NMR** (500 MHz, CDCl<sub>3</sub>): δ 8.33 (s, 2H), 7.98-7.96 (m, 2H), 7.74-7.72 (m, 2H) ppm. **<sup>13</sup>C NMR** (126 MHz, CDCl<sub>3</sub>): δ 133.1, 129.7, 129.4 (m), 128.8, 124.0 (m), 123.3 (q, *J*<sub>C-F</sub> = 274.7 Hz) ppm. **<sup>19</sup>F NMR** (470 MHz, CDCl<sub>3</sub>): δ -60.09 (s, 6F) ppm. **HRMS m/z (APCI):** calcd. for C<sub>12</sub>H<sub>6</sub>F<sub>6</sub> [M]<sup>+</sup>: 264.0368; found: 264.0369.

**2 mmol scale reaction:** Prepared according to the general procedure. Reaction was run using **1b** (696 mg, 2.0 mmol), DDQ (1.096 g, 4.0 mmol), DMSO (40.0 mL), [CuCF<sub>3</sub>] in DMF solution (20.0 mL, 8.0



mmol). The product was purified by flash column chromatography on silica gel (hexane) and obtained a colorless oil (1.0 mmol, 264 mg, 50%),  $R_f = 0.60$  (hexane :  $\text{CH}_2\text{Cl}_2 = 8 : 1$ ).

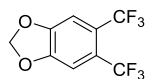

**2d: 5,6-bis(trifluoromethyl)benzo[d][1,3]dioxole.** Prepared according to the general procedure. Reaction was run using **1d** (139.2 mg, 0.4 mmol), DDQ (181.6 mg, 1.20 mmol), DMSO (8.0 mL),  $[\text{CuCF}_3]$  in DMF solution (4.0 mL, 1.6 mmol). The product was purified by flash column chromatography on silica gel (hexane) and obtained a colorless oil (0.31 mmol, 84.5 mg, 78%),  $R_f = 0.40$  (hexane).  $^1\text{H NMR}$  (500 MHz,  $\text{CDCl}_3$ ):  $\delta$  7.25 (s, 2H), 6.15 (s, 2H) ppm.  $^{13}\text{C NMR}$  (126 MHz,  $\text{CDCl}_3$ ):  $\delta$  150.3, 123.3 (m), 122.8 (q,  $J_{\text{C-F}} = 277.1$  Hz), 108.4, 103.3 ppm.  $^{19}\text{F NMR}$  (470 MHz,  $\text{CDCl}_3$ ):  $\delta$  -59.18 (s, 6F) ppm. **HRMS m/z (APCI)**: calcd. for  $\text{C}_9\text{H}_9\text{F}_6\text{O}_2$   $[\text{M}]^+$ : 258.0110; found: 258.0112.

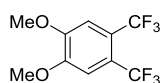

**2e: 1,2-dimethoxy-4,5-bis(trifluoromethyl)benzene.** Prepared according to the general procedure. Reaction was run using **1e** (143.2 mg, 0.4 mmol), DDQ (181.6 mg, 0.8 mmol), DMSO (12.0 mL),  $[\text{CuCF}_3]$  in DMF solution (4.0 mL, 1.6 mmol). The product was purified by flash column chromatography on silica gel (hexane/EtOAc) and obtained a colorless solid (0.25 mmol, 68.0 mg, 62%),  $R_f = 0.30$  (hexane : EtOAc = 5 : 1).  $^1\text{H NMR}$  (500 MHz,  $\text{CDCl}_3$ ):  $\delta$  7.23 (s, 2H), 3.96 (s, 6H) ppm.  $^{13}\text{C NMR}$  (126 MHz,  $\text{CDCl}_3$ ):  $\delta$  150.9, 123.0 (q,  $J_{\text{C-F}} = 274.6$  Hz), 121.1 (m), 110.5, 56.4 ppm.  $^{19}\text{F NMR}$  (470 MHz,  $\text{CDCl}_3$ ):  $\delta$  -59.18 (s, 6F) ppm. **HRMS m/z (APCI)**: calcd. for  $\text{C}_{10}\text{H}_8\text{F}_6\text{O}_2$   $[\text{M}]^+$ : 274.0423; found: 274.0428.

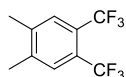

**2f: 1,2-dimethyl-4,5-bis(trifluoromethyl)benzene.** Prepared according to the general procedure. Reaction was run using **1f** (130.4 mg, 0.4 mmol), DDQ (181.6 mg, 0.8 mmol), DMSO (12.0 mL),  $[\text{CuCF}_3]$  in DMF solution (4.0 mL, 1.6 mmol). The product was purified by flash column chromatography on silica gel (hexane) and obtained a colorless oil (0.20 mmol, 48.4 mg, 50%),  $R_f = 0.60$  (hexane).  $^1\text{H NMR}$  (500 MHz,  $\text{CDCl}_3$ ):  $\delta$  7.58 (s, 2H), 2.37 (s, 6H) ppm.  $^{13}\text{C NMR}$  (126 MHz,  $\text{CDCl}_3$ ):  $\delta$  141.3, 129.1 (m), 125.5 (m), 123.2 (q,  $J_{\text{C-F}} = 274.9$  Hz), 19.8 (q,  $J_{\text{C-F}} = 7.8$  Hz) ppm.  $^{19}\text{F NMR}$  (470 MHz,  $\text{CDCl}_3$ ):  $\delta$  -60.14 (s, 6F) ppm. **HRMS m/z (APCI)**: calcd. for  $\text{C}_{10}\text{H}_8\text{F}_6$   $[\text{M}]^+$ : 242.0523; found: 242.0524.

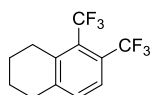

**2g: 5,6-bis(trifluoromethyl)-1,2,3,4-tetrahydronaphthalene.** Prepared according to the general procedure. Reaction was run using **1g** (144.4 mg, 0.4 mmol), DDQ (181.6 mg, 0.8 mmol), DMSO (8.0 mL),  $[\text{CuCF}_3]$  in DMF solution (4.0 mL, 1.6 mmol). The product was purified by preparative TLC (hexane) and obtained a colorless oil (0.21 mmol, 55.7 mg, 52%),  $R_f = 0.60$  (hexane).  $^1\text{H NMR}$  (500 MHz,  $\text{CDCl}_3$ ):  $\delta$  7.58 (d,  $J = 8.0$  Hz, 1H), 7.33 (d,  $J = 8.5$  Hz, 1H), 3.00-2.94 (m, 2H), 2.92-2.87 (m, 2H), 1.84-1.77 (m, 4H) ppm.  $^{13}\text{C NMR}$  (126 MHz,  $\text{CDCl}_3$ ):  $\delta$  143.6, 139.7, 132.5, 127.3 (q,  $J_{\text{C-F}} = 30.4$  Hz), 126.4 (q,  $J_{\text{C-F}} = 32.4$  Hz), 124.6 (m), 123.8 (q,  $J_{\text{C-F}} = 276.6$  Hz), 123.6 (q,  $J_{\text{C-F}} = 274.2$  Hz), 30.2 (t,  $J_{\text{C-F}} = 15.5$  Hz), 27.5 (m), 22.6, 21.7 ppm.  $^{19}\text{F NMR}$  (470 MHz,  $\text{CDCl}_3$ ):  $\delta$  -56.22 (q,  $J_{\text{F-F}} = 16.9$  Hz, 3F), -

58.63 (q,  $J_{F-F} = 16.9$  Hz, 3F) ppm. **HRMS m/z (ACPI)**: calcd. for  $C_{12}H_{10}F_6$   $[M]^+$ : 268.0681; found: 268.0683.

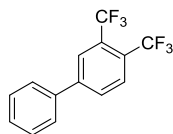

**2h: 3,4-bis(trifluoromethyl)-1,1'-biphenyl.** Prepared according to the general procedure. Reaction was run using **1f** (149.6 mg, 0.4 mmol), DDQ (181.6 mg, 0.8 mmol), DMSO (8.0 mL),  $[CuCF_3]$  in DMF solution (4.0 mL, 1.6 mmol). The product was purified by flash column chromatography on silica gel (hexane) and obtained a colorless oil (0.31 mmol, 90.5 mg, 78%),  $R_f = 0.60$  (hexane).  **$^1H$  NMR** (500 MHz,  $CDCl_3$ ):  $\delta$  8.09 (s, 1H), 7.94 (d,  $J = 8.0$  Hz, 1H), 7.88 (d,  $J = 8.0$  Hz, 1H), 7.64 (d,  $J = 7.5$  Hz, 2H), 7.53 (t,  $J = 7.5$  Hz, 2H), 7.50 (t,  $J = 7.5$  Hz, 1H) ppm.  **$^{13}C$  NMR** (126 MHz,  $CDCl_3$ ):  $\delta$  145.4, 138.3, 130.3, 129.4, 129.2, 128.8 (q,  $J_{C-F} = 34.0$  Hz), 128.7 (q,  $J_{C-F} = 5.9$  Hz), 127.4, 126.7 (q,  $J_{C-F} = 33.1$  Hz), 126.7 (q,  $J_{C-F} = 6.0$  Hz), 123.2 (q,  $J_{C-F} = 275.1$  Hz), 123.1 (q,  $J_{C-F} = 271.5$  Hz) ppm.  **$^{19}F$  NMR** (470 MHz,  $CDCl_3$ ):  $\delta$  -60.07 (q,  $J_{F-F} = 12.7$  Hz, 3F), -60.35 (q,  $J_{F-F} = 12.7$  Hz, 3F) ppm. **HRMS m/z (APCI)**: calcd. for  $C_{14}H_8F_6$   $[M]^+$ : 290.0525; found: 290.0525.

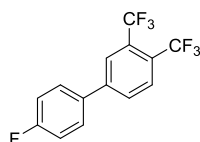

**2i: 4'-fluoro-3,4-bis(trifluoromethyl)-1,1'-biphenyl.** Prepared according to the general procedure. Reaction was run using **1i** (156.8 mg, 0.4 mmol), DDQ (181.6 mg, 0.8 mmol), DMSO (8.0 mL),  $[CuCF_3]$  in DMF solution (4.0 mL, 1.6 mmol). The product was purified by flash column chromatography on silica gel (hexane) and obtained a colorless oil (0.32 mmol, 98.6 mg, 80%),  $R_f = 0.60$  (hexane).  **$^1H$  NMR** (400 MHz,  $CDCl_3$ ):  $\delta$  8.01 (s, 1H), 7.92 (d,  $J = 8.0$  Hz, 1H), 7.83 (d,  $J = 8.0$  Hz, 1H), 7.62-7.58 (m, 2H), 7.20 (t,  $J = 8.6$  Hz, 2H) ppm.  **$^{13}C$  NMR** (101 MHz,  $CDCl_3$ ):  $\delta$  163.6 (d,  $J_{C-F} = 250.4$  Hz), 144.4, 134.4 (q,  $J_{C-F} = 3.2$  Hz), 130.2, 129.2 (d,  $J_{C-F} = 8.4$  Hz), 128.9 (q,  $J_{C-F} = 35.4$  Hz), 128.7 (q,  $J_{C-F} = 5.9$  Hz), 126.8 (q,  $J_{C-F} = 33.4$  Hz), 126.5 (q,  $J_{C-F} = 6.0$  Hz), 123.1 (q,  $J_{C-F} = 276.9$  Hz), 123.0 (q,  $J_{C-F} = 275.3$  Hz), 116.4 (d,  $J_{C-F} = 21.9$  Hz), ppm.  **$^{19}F$  NMR** (376 MHz,  $CDCl_3$ ):  $\delta$  -61.29 (q,  $J_{F-F} = 12.8$  Hz, 3F), -61.58 (q,  $J_{F-F} = 12.8$  Hz, 3F), -114.7 (m) ppm. **HRMS m/z (APCI)**: calcd. for  $C_{14}H_7F_7$   $[M]^+$ : 308.0431; found: 308.0427.

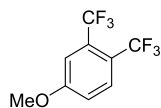

**2j: 4-methoxy-1,2-bis(trifluoromethyl)benzene.** Prepared according to the general procedure. Reaction was run using **1j** (131.2 mg, 0.4 mmol), DDQ (181.6 mg, 0.8 mmol), DMSO (8.0 mL),  $[CuCF_3]$  in DMF solution (4.0 mL, 1.6 mmol). The product was purified by flash column chromatography on silica gel (hexane) and obtained a colorless oil (60%  $^{19}F$  NMR yield),  $R_f = 0.40$  (hexane).  **$^1H$  NMR** (500 MHz,  $CDCl_3$ ):  $\delta$  7.77 (d,  $J = 8.5$  Hz, 1H), 7.33 (s, 1H), 7.10 (d,  $J = 8.5$  Hz, 1H), 3.90 (s, 2H) ppm.  **$^{13}C$  NMR** (101 MHz,  $CDCl_3$ ):  $\delta$  162.0, 130.0 (q,  $J_{C-F} = 6.1$  Hz), 129.9 (q,  $J_{C-F} = 33.7$  Hz), 123.2 (q,  $J_{C-F} = 273.2$  Hz), 122.7 (q,  $J_{C-F} = 274.8$  Hz), 120.1 (q,  $J_{C-F} = 35.2$  Hz), 115.9, 114.7 (q,  $J_{C-F} = 6.2$  Hz), 55.9 ppm.  **$^{19}F$  NMR**

(470 MHz, CDCl<sub>3</sub>):  $\delta$  -59.27 (q,  $J_{F-F}$  = 12.7 Hz, 3F), -60.72 (q,  $J_{F-F}$  = 12.7 Hz, 3F) ppm. **HRMS m/z (APCI)**: calcd. for C<sub>9</sub>H<sub>9</sub>F<sub>6</sub>O [M]<sup>+</sup>: 244.0317; found: 244.0316.

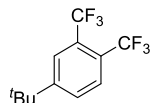

**2k: 4-(tert-butyl)-1,2-bis(trifluoromethyl)benzene.** Prepared according to the general procedure. Reaction was run using **1k** (141.6 mg, 0.4 mmol), DDQ (181.6 mg, 0.8 mmol), DMSO (8.0 mL), [CuCF<sub>3</sub>] in DMF solution (4.0 mL, 1.6 mmol). The product was purified by flash column chromatography on silica gel (hexane) and obtained a colorless oil (0.24 mmol, 64.8 mg, 60%), R<sub>f</sub> = 0.60 (hexane). **<sup>1</sup>H NMR** (500 MHz, CDCl<sub>3</sub>):  $\delta$  7.84 (s, 1H), 7.77 (d,  $J$  = 8.0 Hz, 1H), 7.67 (d,  $J$  = 8.5 Hz, 1H), 1.37 (s, 9H) ppm. **<sup>13</sup>C NMR** (126 MHz, CDCl<sub>3</sub>):  $\delta$  156.1, 128.9, 128.0 (q,  $J_{C-F}$  = 5.8 Hz), 127.9 (q,  $J_{C-F}$  = 31.4 Hz), 125.4 (q,  $J_{C-F}$  = 31.2 Hz), 125.1 (q,  $J_{C-F}$  = 5.9 Hz), 123.2 (q,  $J_{C-F}$  = 275.2 Hz), 123.2 (q,  $J_{C-F}$  = 274.6 Hz), 35.3, 31.0 ppm. **<sup>19</sup>F NMR** (470 MHz, CDCl<sub>3</sub>):  $\delta$  -60.23 (q,  $J_{F-F}$  = 12.7 Hz, 3F), -60.39 (q,  $J_{F-F}$  = 12.7 Hz, 3F) ppm. **HRMS m/z (APCI)**: calcd. for C<sub>12</sub>H<sub>12</sub>F<sub>6</sub> [M-F]<sup>-</sup>: 251.0854; found: 251.0855.

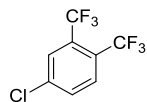

**2l: 4-chloro-1,2-bis(trifluoromethyl)benzene.** Prepared according to the general procedure. Reaction was run using **1l** (132.8 mg, 0.4 mmol), DDQ (181.6 mg, 0.8 mmol), DMSO (4.0 mL), [CuCF<sub>3</sub>] in DMF solution (4.0 mL, 1.6 mmol). The product was purified by flash column chromatography on silica gel (hexane) and obtained a colorless oil (50% <sup>19</sup>F NMR yield), R<sub>f</sub> = 0.60 (hexane). The spectra contain hexane due to low boiling point. **<sup>1</sup>H NMR** (500 MHz, CDCl<sub>3</sub>):  $\delta$  7.84 (s, 1H), 7.80 (d,  $J$  = 8.5 Hz, 1H), 7.67 (d,  $J$  = 8.5 Hz, 1H) ppm. **<sup>13</sup>C NMR** (126 MHz, CDCl<sub>3</sub>):  $\delta$  138.9, 132.2, 130.0 (q,  $J_{C-F}$  = 35.8 Hz), 129.6 (m), 128.5 (m), 126.8 (q,  $J_{C-F}$  = 32.9 Hz), 122.6 (q,  $J_{C-F}$  = 271.5 Hz), 122.1 (q,  $J_{C-F}$  = 274.2 Hz) ppm. **<sup>19</sup>F NMR** (470 MHz, CDCl<sub>3</sub>):  $\delta$  -60.26 (q,  $J_{F-F}$  = 12.7 Hz, 3F), -60.72 (q,  $J_{F-F}$  = 12.7 Hz, 3F) ppm. **HRMS m/z (APCI)**: calcd. for C<sub>8</sub>H<sub>3</sub>ClF<sub>6</sub> [M]<sup>+</sup>: 247.9822; found: 247.9824.

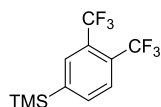

**2m: (3,4-bis(trifluoromethyl)phenyl)trimethylsilane.** Prepared according to the general procedure. Reaction was run using **1m** (148.0 mg, 0.4 mmol), DDQ (181.6 mg, 0.8 mmol), DMSO (8.0 mL), [CuCF<sub>3</sub>] in DMF solution (4.0 mL, 1.6 mmol). The product was purified by flash column chromatography on silica gel (hexane) and obtained a colorless oil (0.20 mmol, 57.2 mg, 50%), R<sub>f</sub> = 0.70 (hexane). **<sup>1</sup>H NMR** (500 MHz, CDCl<sub>3</sub>):  $\delta$  7.94 (s, 1H), 7.81 (s, 2H), 0.33 (s, 9H) ppm. **<sup>13</sup>C NMR** (126 MHz, CDCl<sub>3</sub>):  $\delta$  147.0, 137.2, 132.3 (q,  $J_{C-F}$  = 5.8 Hz), 128.3 (q,  $J_{C-F}$  = 33.3 Hz), 127.2 (q,  $J_{C-F}$  = 33.4 Hz), 126.9 (q,  $J_{C-F}$  = 5.9 Hz), 123.3 (q,  $J_{C-F}$  = 275.9 Hz), 123.1 (q,  $J_{C-F}$  = 272.8 Hz), -1.42 ppm. **<sup>19</sup>F NMR** (470 MHz, CDCl<sub>3</sub>):  $\delta$  -60.34 (q,  $J_{F-F}$  = 12.7 Hz, 3F), -60.68 (q,  $J_{F-F}$  = 12.7 Hz, 3F) ppm. **HRMS m/z (EI)**: calcd. for C<sub>11</sub>H<sub>12</sub>F<sub>6</sub>Si [M-CH<sub>3</sub>]<sup>+</sup>: 271.0372; found: 271.0371.

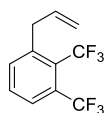

**2n: 1-allyl-2,3-bis(trifluoromethyl)benzene.** Prepared according to the general procedure. Reaction was run using **1n** (135.2 mg, 0.4 mmol), DDQ (181.6 mg, 0.8 mmol), DMSO (8.0 mL), [CuCF<sub>3</sub>] in DMF solution (4.0 mL, 1.6 mmol). The product was purified by flash column chromatography on silica gel (hexane) and obtained a colorless oil (0.26 mmol, 66.0 mg, 65%), R<sub>f</sub> = 0.60 (hexane). **<sup>1</sup>H NMR** (500 MHz, CDCl<sub>3</sub>): δ 7.74 (s, 1H), 7.60-7.55 (m, 2H), 5.97-5.90 (m, 1H), 5.15-5.07 (m, 2H), 3.63 (d, *J* = 5.5 Hz, 1H) ppm. **<sup>13</sup>C NMR** (126 MHz, CDCl<sub>3</sub>): δ 142.0 (q, *J*<sub>C-F</sub> = 1.9 Hz), 136.2, 135.8, 131.4, 128.9 (q, *J*<sub>C-F</sub> = 32.4 Hz), 127.1 (q, *J*<sub>C-F</sub> = 32.4 Hz), 126.0 (q, *J*<sub>C-F</sub> = 7.1 Hz), 123.5 (q, *J*<sub>C-F</sub> = 276.2 Hz), 123.3 (q, *J*<sub>C-F</sub> = 274.6 Hz), 117.3, 38.4 (q, *J*<sub>C-F</sub> = 3.7 Hz) ppm. **<sup>19</sup>F NMR** (470 MHz, CDCl<sub>3</sub>): δ -54.93 (q, *J*<sub>F-F</sub> = 16.0 Hz, 3F), -58.65 (q, *J*<sub>F-F</sub> = 16.0 Hz, 3F) ppm. **HRMS m/z (APCI)**: calcd. for C<sub>11</sub>H<sub>8</sub>F<sub>6</sub> [M]<sup>+</sup>: 254.0525; found: 254.0526.

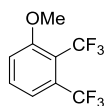

**2o: 1-methoxy-2,3-bis(trifluoromethyl)benzene.** Prepared according to the general procedure. Reaction was run using **1o** (131.2 mg, 0.4 mmol), DDQ (181.6 mg, 0.8 mmol), DMSO (4.0 mL), [CuCF<sub>3</sub>] in DMF solution (4.0 mL, 1.6 mmol). The product was purified by flash column chromatography on silica gel (hexane) and obtained a colorless oil (36% <sup>19</sup>F NMR yield), R<sub>f</sub> = 0.40 (hexane). **<sup>1</sup>H NMR** (500 MHz, CDCl<sub>3</sub>): δ 7.59 (t, *J* = 8.0 Hz, 1H), 7.43 (d, *J* = 8.0 Hz, 1H), 7.27 (d, *J* = 7.5 Hz, 1H), 3.95 (s, 3H) ppm. **<sup>13</sup>C NMR** (126 MHz, CDCl<sub>3</sub>): δ 159.6, 132.9, 129.7 (q, *J*<sub>C-F</sub> = 34.3 Hz), 123.0 (q, *J*<sub>C-F</sub> = 274.2 Hz), 122.7 (q, *J*<sub>C-F</sub> = 274.8 Hz), 119.3 (m), 117.3 (q, *J*<sub>C-F</sub> = 32.6 Hz), 116.7, 56.9 (q, *J*<sub>C-F</sub> = 18.6 Hz) ppm. **<sup>19</sup>F NMR** (470 MHz, CDCl<sub>3</sub>): δ -58.07 (q, *J*<sub>F-F</sub> = 16.0 Hz, 3F), -58.99 (q, *J*<sub>F-F</sub> = 16.0 Hz, 3F) ppm. **HRMS m/z (APCI)**: calcd. for C<sub>9</sub>H<sub>9</sub>F<sub>6</sub>O [M]<sup>+</sup>: 244.0317; found: 244.0319.

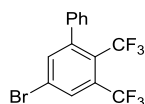

**2p: 5-bromo-2,3-bis(trifluoromethyl)-1,1'-biphenyl.** Prepared according to the general procedure. Reaction was run using **1p** (184.4 mg, 0.4 mmol), DDQ (181.6 mg, 0.8 mmol), DMSO (4.0 mL), [CuCF<sub>3</sub>] in DMF solution (4.0 mL, 1.6 mmol). The product was purified by flash column chromatography on silica gel (hexane) and obtained a colorless oil (0.14 mmol, 51.5 mg, 35%), R<sub>f</sub> = 0.40 (hexane). **<sup>1</sup>H NMR** (500 MHz, CDCl<sub>3</sub>): δ 8.03 (s, 1H), 7.73 (s, 1H), 7.44 (m, 3H), 7.30 (m, 2H) ppm. **<sup>13</sup>C NMR** (126 MHz, CDCl<sub>3</sub>): δ 146.1, 139.3, 139.0, 138.8, 131.0 (q, *J*<sub>C-F</sub> = 33.5 Hz), 130.3 (dq, *J*<sub>C-F</sub> = 25.6 Hz, *J*<sub>C-F</sub> = 6.8 Hz), 128.3 (m), 125.9 (q, *J*<sub>C-F</sub> = 32.5 Hz), 125.6, 122.9 (q, *J*<sub>C-F</sub> = 276.8 Hz), 122.5 (q, *J*<sub>C-F</sub> = 275.3 Hz) (one carbon missing due to overlap) ppm. **<sup>19</sup>F NMR** (470 MHz, CDCl<sub>3</sub>): δ -52.41 (q, *J*<sub>F-F</sub> = 15.0 Hz, 3F), -59.05 (q, *J*<sub>F-F</sub> = 15.5 Hz, 3F) ppm. **HRMS m/z (APCI)**: calcd. for C<sub>14</sub>H<sub>7</sub>BrF<sub>6</sub> [M]<sup>+</sup>: 367.9630; found: 367.9629.

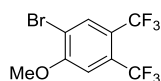

**2q: 1-bromo-2-methoxy-4,5-bis(trifluoromethyl)benzene.** Prepared according to the general

procedure. Reaction was run using **1q** (162.4 mg, 0.4 mmol), DDQ (181.6 mg, 0.8 mmol), DMSO (8.0 mL), [CuCF<sub>3</sub>] in DMF solution (4.0 mL, 1.6 mmol). The product was purified by flash column chromatography on silica gel (hexane) and obtained a colorless oil (0.17 mmol, 55.4 mg, 43%), R<sub>f</sub> = 0.50 (hexane : CH<sub>2</sub>Cl<sub>2</sub> = 8 : 1). **<sup>1</sup>H NMR** (500 MHz, CDCl<sub>3</sub>): δ 7.74 (s, 1H), 7.00 (s, 1H), 3.75 (s, 3H) ppm. **<sup>13</sup>C NMR** (126 MHz, CDCl<sub>3</sub>): δ 158.5, 133.3 (dq, *J*<sub>C-F</sub> = 26.2 Hz, *J*<sub>C-F</sub> = 6.0 Hz), 129.0 (q, *J*<sub>C-F</sub> = 34.5 Hz), 122.5 (q, *J*<sub>C-F</sub> = 274.4 Hz), 122.3 (q, *J*<sub>C-F</sub> = 273.5 Hz), 121.3 (q, *J*<sub>C-F</sub> = 34.7 Hz), 115.4, 110.9 (m), 56.9 (q, *J*<sub>C-F</sub> = 39.2 Hz) ppm. **<sup>19</sup>F NMR** (470 MHz, CDCl<sub>3</sub>): δ -59.41 (m, 3F), -60.42 (m, 3F) ppm. **HRMS m/z (APCI)**: calcd. for C<sub>9</sub>H<sub>5</sub>BrF<sub>6</sub>O [M]<sup>+</sup>: 321.9423; found: 321.9425.

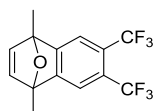

**2s: 1,4-dimethyl-6,7-bis(trifluoromethyl)-1,4-dihydro-1,4-epoxynaphthalene.** Prepared according to the general procedure. Reaction was run using **1s** (160.4 mg, 0.4 mmol), DDQ (181.6 mg, 0.8 mmol), DMSO (8.0 mL), [CuCF<sub>3</sub>] in DMF solution (4.0 mL, 1.6 mmol). The product was purified by flash column chromatography on silica gel (hexane) and obtained a colorless oil (0.28 mmol, 86.2 mg, 70%), R<sub>f</sub> = 0.50 (hexane : EtOAc = 8 : 1). **<sup>1</sup>H NMR** (400 MHz, CDCl<sub>3</sub>): δ 7.53 (s, 2H), 6.82 (s, 2H), 1.94 (s, 6H) ppm. **<sup>13</sup>C NMR** (101 MHz, CDCl<sub>3</sub>): δ 158.0, 146.8, 126.0 (m), 123.0 (q, *J*<sub>C-F</sub> = 276.0 Hz), 117.4 (m), 88.9, 15.0 ppm. **<sup>19</sup>F NMR** (376 MHz, CDCl<sub>3</sub>): δ -59.46 (s, 6F) ppm. **HRMS m/z (APCI)**: calcd. for C<sub>14</sub>H<sub>10</sub>F<sub>6</sub>O [M]<sup>+</sup>: 309.0709; found: 309.0708.

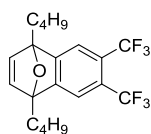

**2t: 1,4-dibutyl-6,7-bis(trifluoromethyl)-1,4-dihydro-1,4-epoxynaphthalene.** Prepared according to the general procedure. Reaction was run using **1t** (190.4 mg, 0.4 mmol), DDQ (181.6 mg, 0.8 mmol), DMSO (12.0 mL), [CuCF<sub>3</sub>] in DMF solution (4.0 mL, 1.6 mmol). The product was purified by flash column chromatography on silica gel (hexane) and obtained a colorless oil (0.25 mmol, 97.2 mg, 62%), R<sub>f</sub> = 0.60 (hexane : CH<sub>2</sub>Cl<sub>2</sub> = 6 : 1). **<sup>1</sup>H NMR** (500 MHz, CDCl<sub>3</sub>): δ 7.52 (s, 2H), 6.82 (s, 2H), 2.40-2.36 (m, 2H), 2.28-2.21 (m, 2H), 1.67-1.55 (m, 4H), 1.53-1.46 (m, 4H), 1.00 (d, *J* = 7.0 Hz, 6H) ppm. **<sup>13</sup>C NMR** (126 MHz, CDCl<sub>3</sub>): δ 158.1, 146.0, 125.7 (m), 123.1 (q, *J*<sub>C-F</sub> = 275.6 Hz), 117.7, 92.2, 28.8, 26.9, 23.2, 14.1 ppm. **<sup>19</sup>F NMR** (470 MHz, CDCl<sub>3</sub>): δ -59.43 (s, 6F) ppm. **HRMS m/z (ESI)**: calcd. for C<sub>20</sub>H<sub>22</sub>F<sub>6</sub>O [M+H]<sup>+</sup>: 393.1648; found: 393.1647.

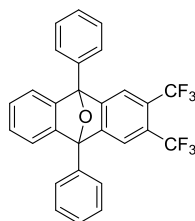

**2u: 9,10-diphenyl-2,3-bis(trifluoromethyl)-9,10-dihydro-9,10-epoxyanthracene.** Prepared according to the general procedure. Reaction was run using **1u** (226.4 mg, 0.4 mmol), DDQ (181.6 mg, 0.8 mmol), DMSO (8.0 mL), [CuCF<sub>3</sub>] in DMF solution (4.0 mL, 1.6 mmol). The product was purified by flash

column chromatography on silica gel (hexane) and obtained a colorless oil (0.25 mmol, 121.4 mg, 63%),  $R_f = 0.60$  (hexane :  $\text{CH}_2\text{Cl}_2 = 3 : 1$ ).  **$^1\text{H NMR}$**  (400 MHz,  $\text{CDCl}_3$ ):  $\delta$  8.01 (d,  $J = 7.6$  Hz, 4H), 7.88 (s, 2H), 7.72 (d,  $J = 7.6$  Hz, 4H), 7.61 (d,  $J = 7.2$  Hz, 2H), 7.55-7.51 (m, 2H), 7.19-7.17 (m, 2H) ppm.  **$^{13}\text{C NMR}$**  (101 MHz,  $\text{CDCl}_3$ ):  $\delta$  155.6, 148.9, 133.6, 129.3, 129.1, 127.9 (m), 126.8, 126.7, 122.9 (q,  $J_{\text{C-F}} = 276.3$  Hz), 121.4, 119.6 (m), 90.7 ppm.  **$^{19}\text{F NMR}$**  (376 MHz,  $\text{CDCl}_3$ ):  $\delta$  -59.73 (s, 6F) ppm. **HRMS  $m/z$  (ESI)**: calcd. for  $\text{C}_{28}\text{H}_{16}\text{F}_6\text{O}$   $[\text{M}+\text{H}]^+$ : 483.1178; found: 483.1179.

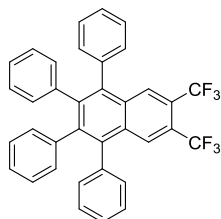

**2v: 1,2,3,4-tetraphenyl-6,7-bis(trifluoromethyl)naphthalene.** Prepared according to the general procedure. Reaction was run using **1v** (260.8 mg, 0.4 mmol), DDQ (181.6 mg, 0.8 mmol), DMSO (8.0 mL),  $[\text{CuCF}_3]$  in DMF solution (4.0 mL, 1.6 mmol). The product was purified by flash column chromatography on silica gel (hexane) and obtained a colorless oil (0.19 mmol, 109.0 mg, 48%),  $R_f = 0.50$  (hexane :  $\text{CH}_2\text{Cl}_2 = 5 : 1$ ).  **$^1\text{H NMR}$**  (500 MHz,  $\text{CDCl}_3$ ):  $\delta$  8.28 (s, 2H), 7.38-7.29 (m, 6H), 7.27 (d,  $J = 7.0$  Hz, 4H), 6.99-6.94 (m, 6H), 6.92 (d,  $J = 6.0$  Hz, 4H) ppm.  **$^{13}\text{C NMR}$**  (126 MHz,  $\text{CDCl}_3$ ):  $\delta$  142.8, 139.7, 139.5, 137.8, 132.1, 131.1, 131.0, 128.5, 128.1, 127.5, 127.0, 126.1, 123.7 (m), 123.3 (q,  $J_{\text{C-F}} = 275.2$  Hz) ppm.  **$^{19}\text{F NMR}$**  (470 MHz,  $\text{CDCl}_3$ ):  $\delta$  -60.43 (s, 6F) ppm. **HRMS  $m/z$  (ESI)**: calcd. for  $\text{C}_{36}\text{H}_{22}\text{F}_6$   $[\text{M}+\text{H}]^+$ : 569.1699; found: 569.1697.

# Spectra

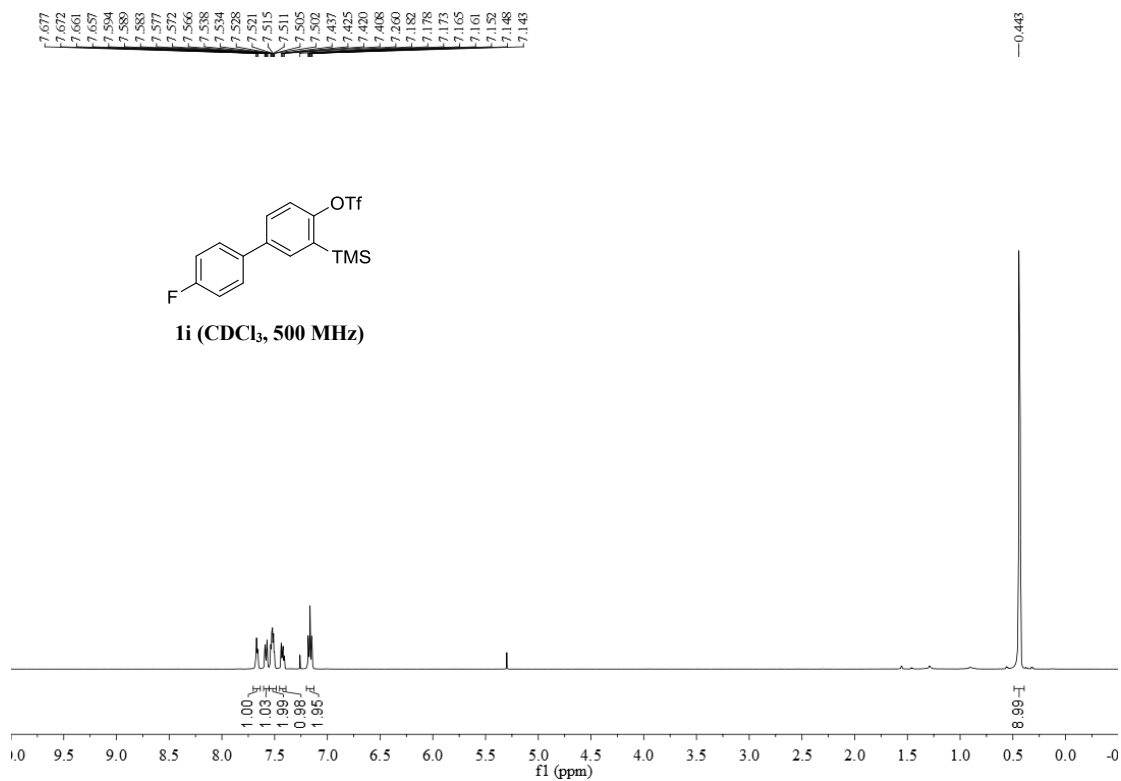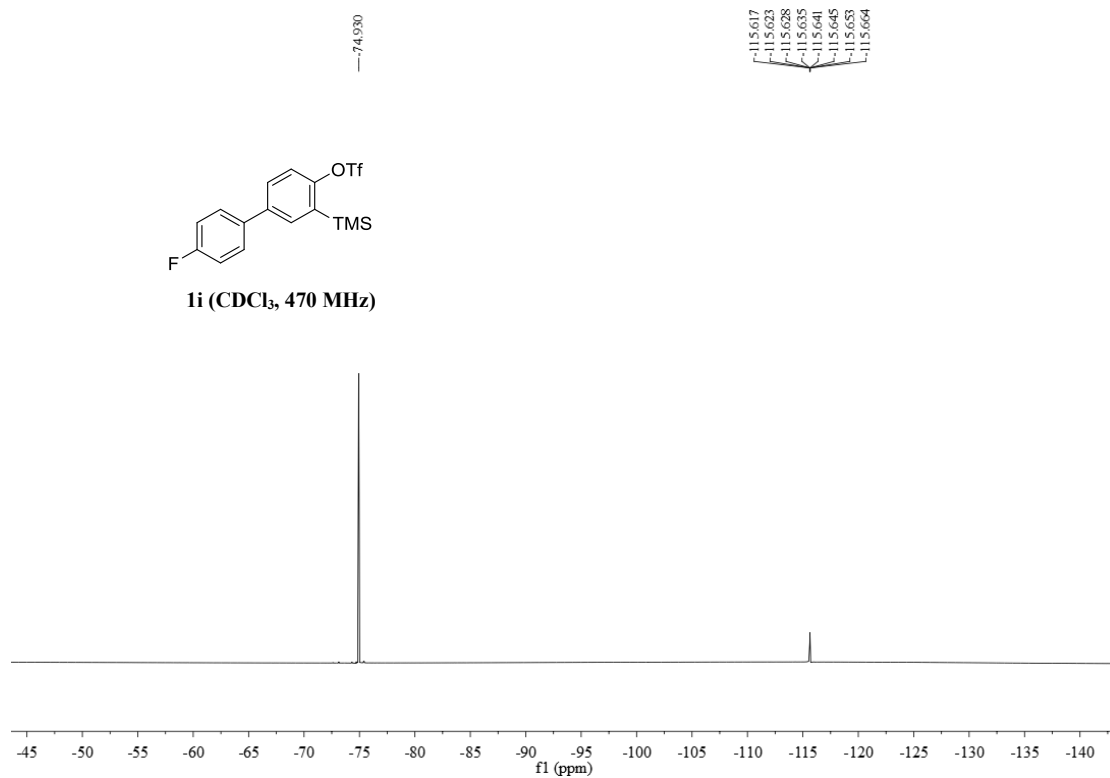

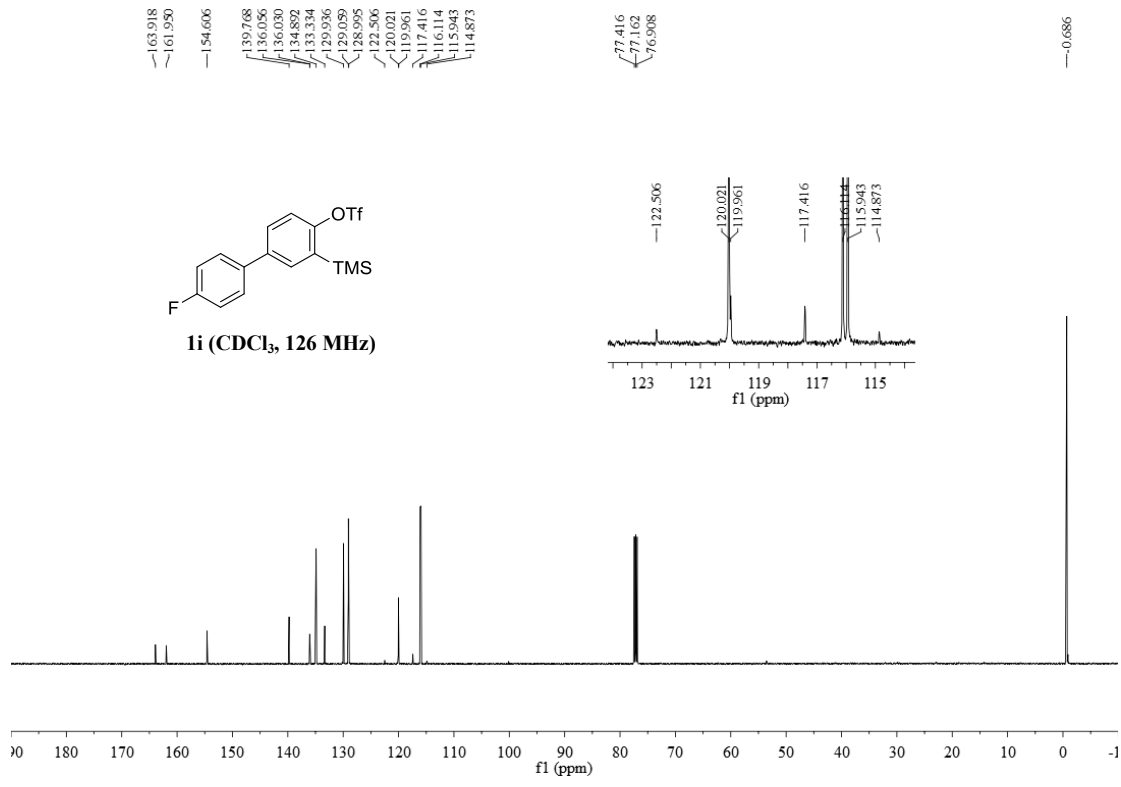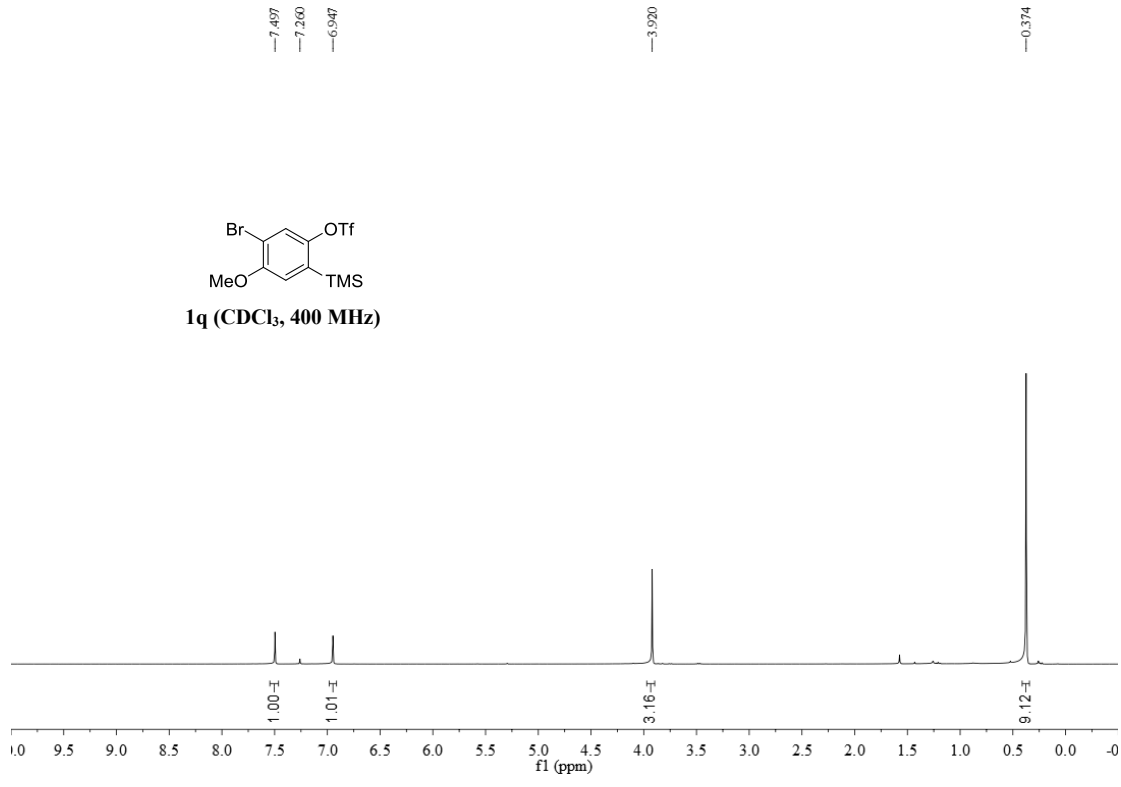



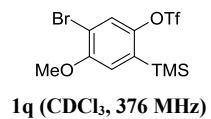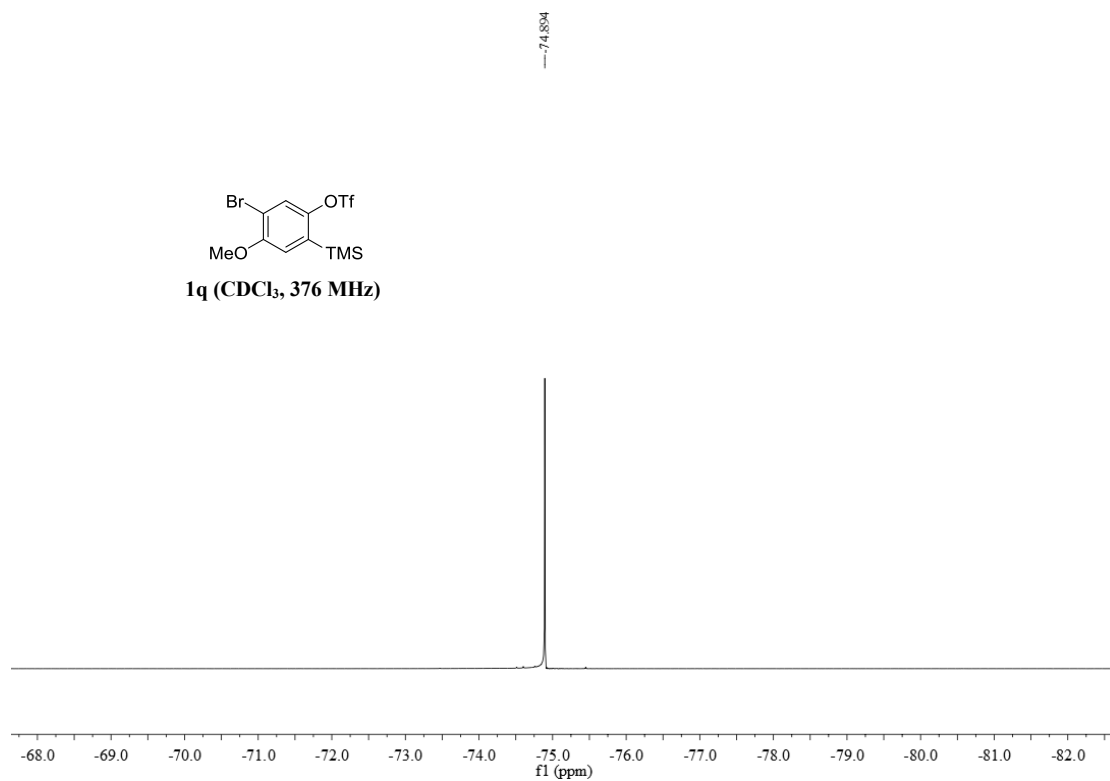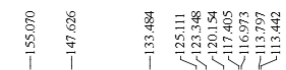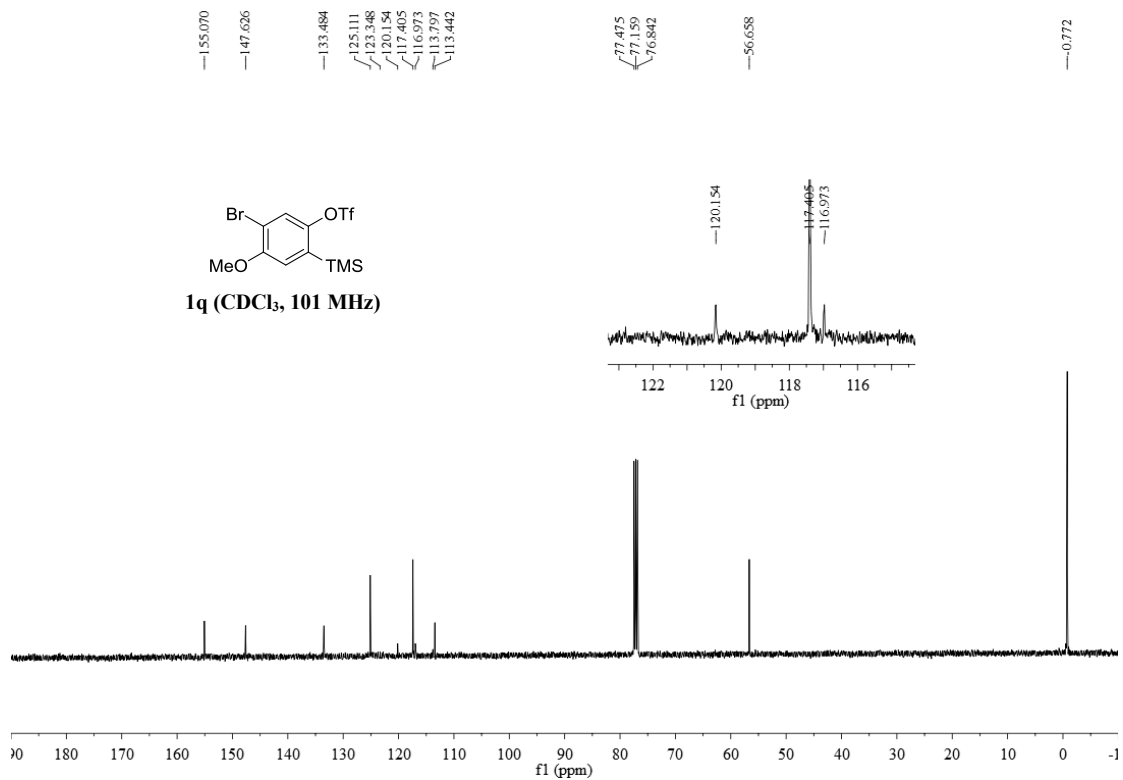

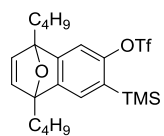

1t (CDCl<sub>3</sub>, 500 MHz)

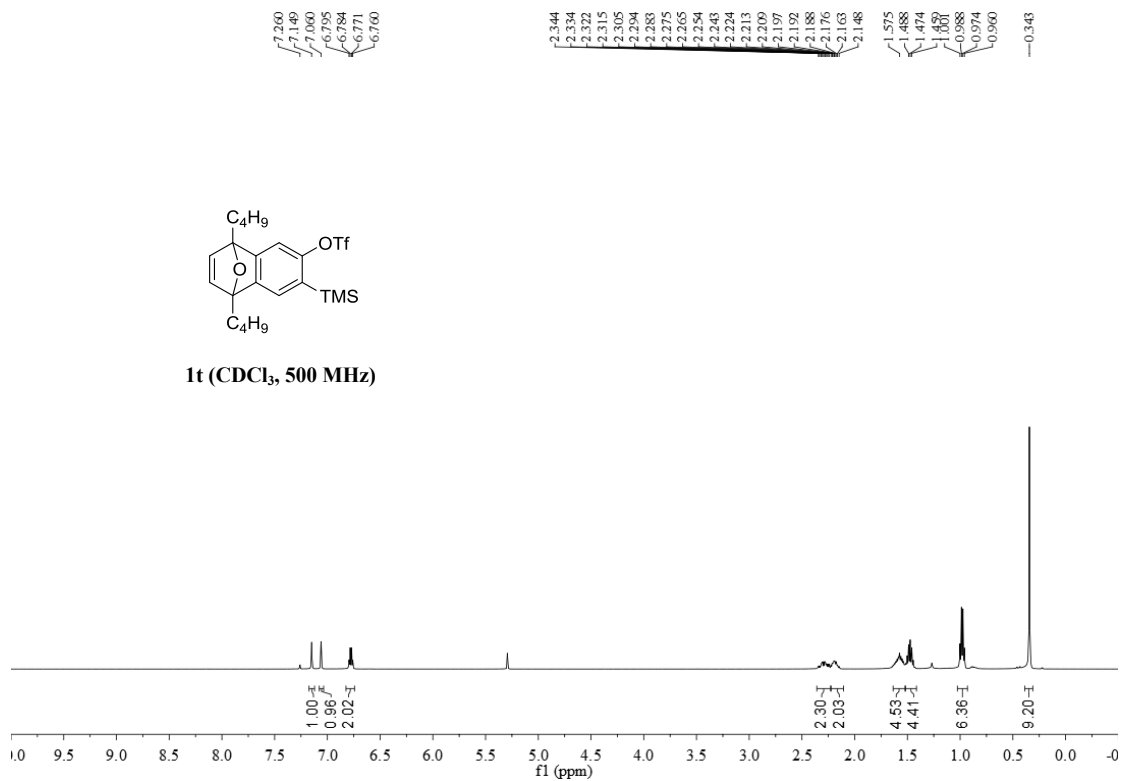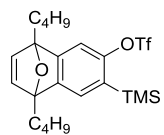

1t (CDCl<sub>3</sub>, 470 MHz)

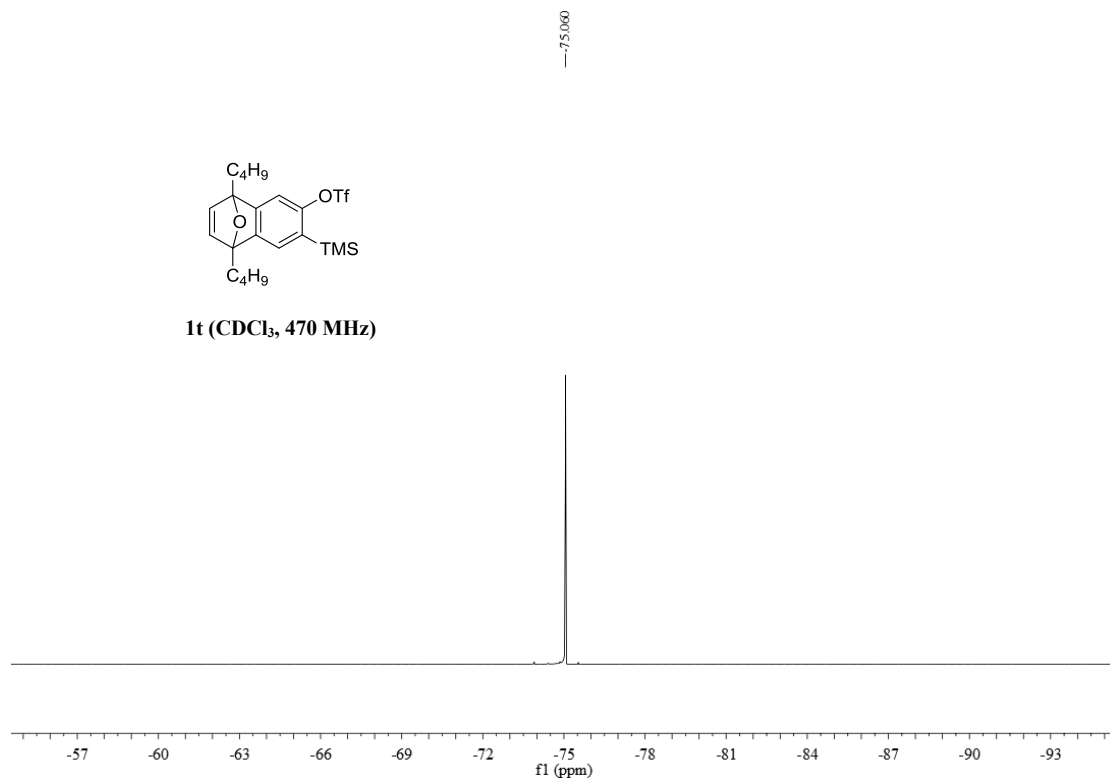

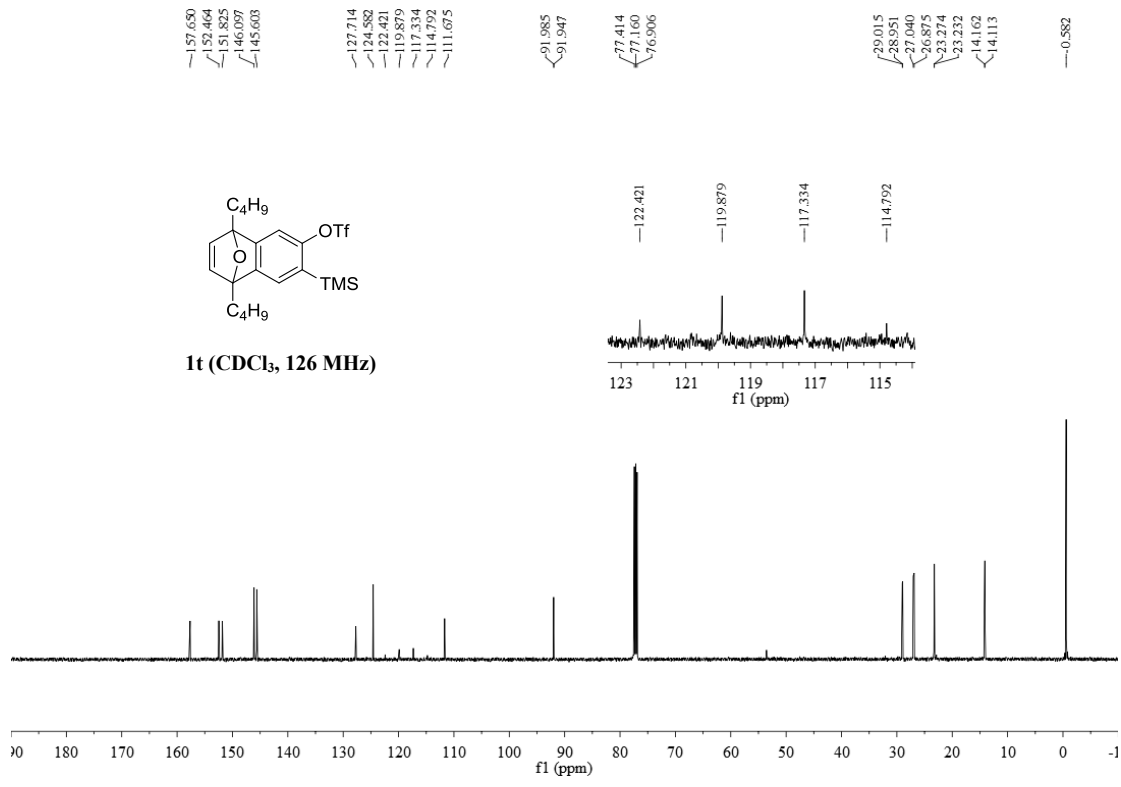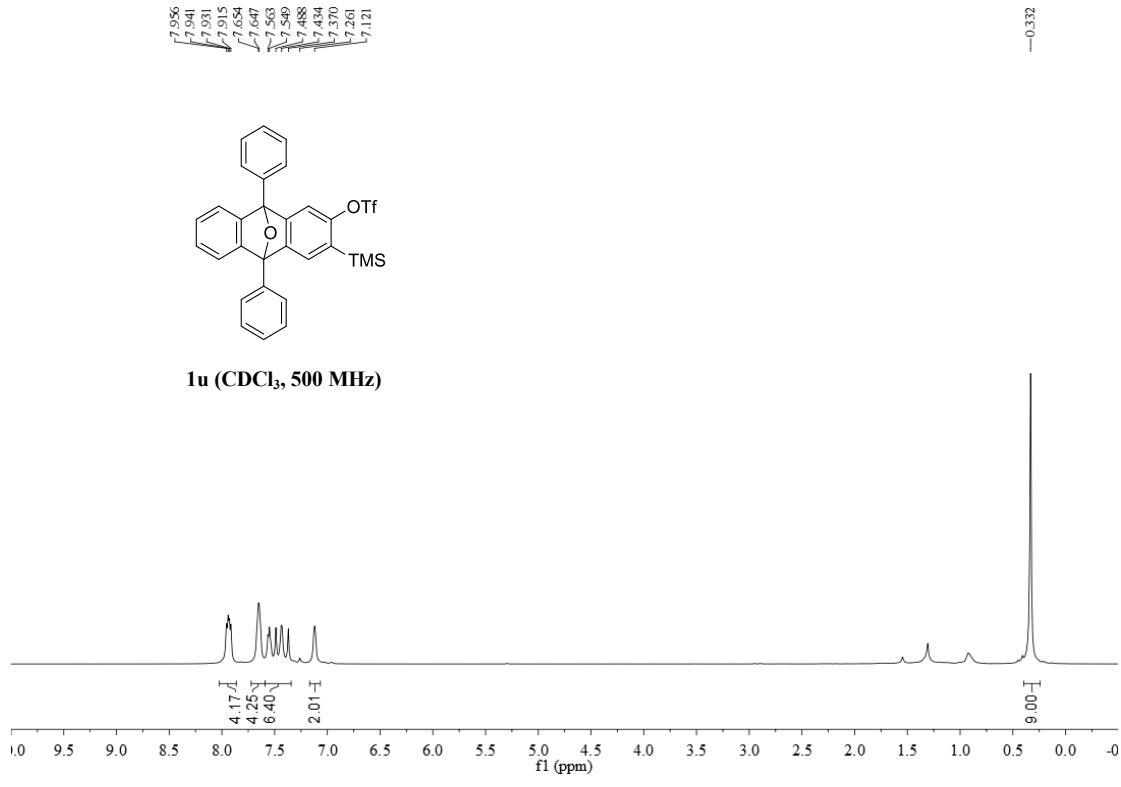

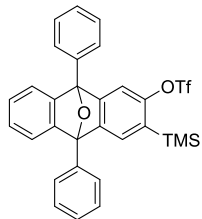

**1u** (CDCl<sub>3</sub>, 470 MHz)

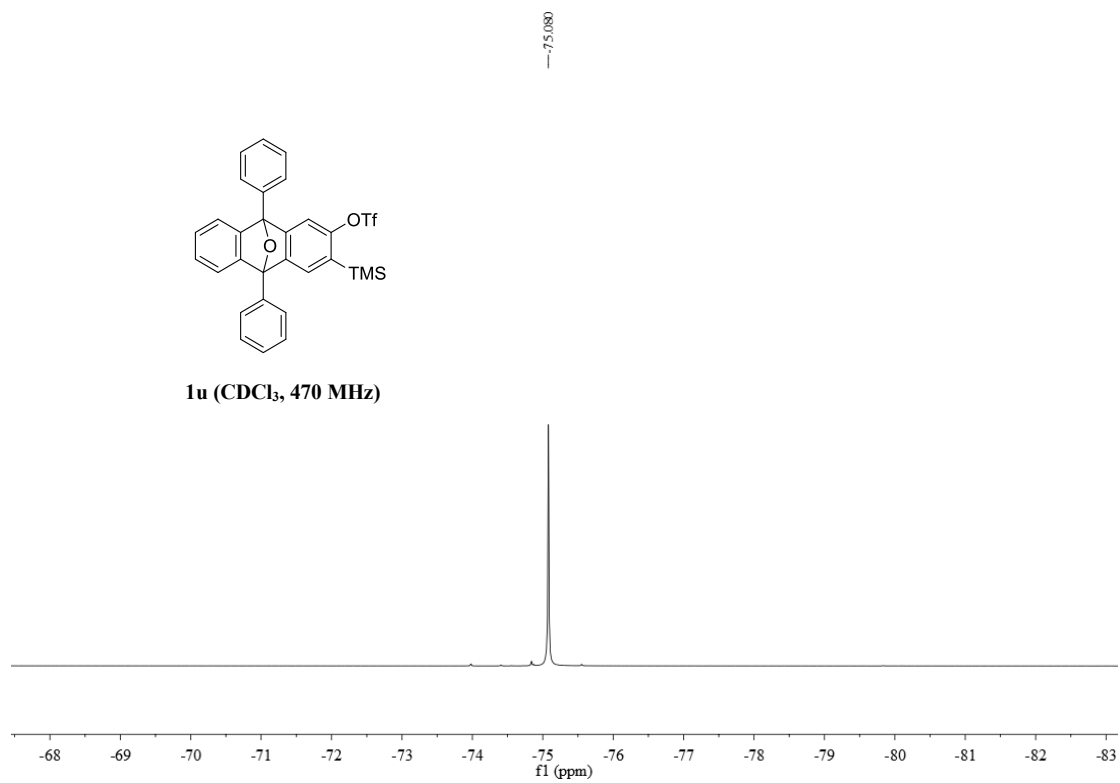

155.034  
153.016  
149.862  
149.569  
149.454  
134.419  
134.034  
129.771  
129.140  
129.072  
128.903  
128.713  
126.776  
126.738  
126.703  
126.433  
126.378  
121.095  
120.800  
119.820  
117.276  
112.957  
90.381

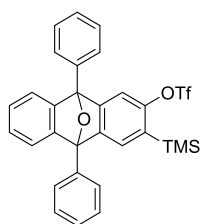

**1u** (CDCl<sub>3</sub>, 126 MHz)

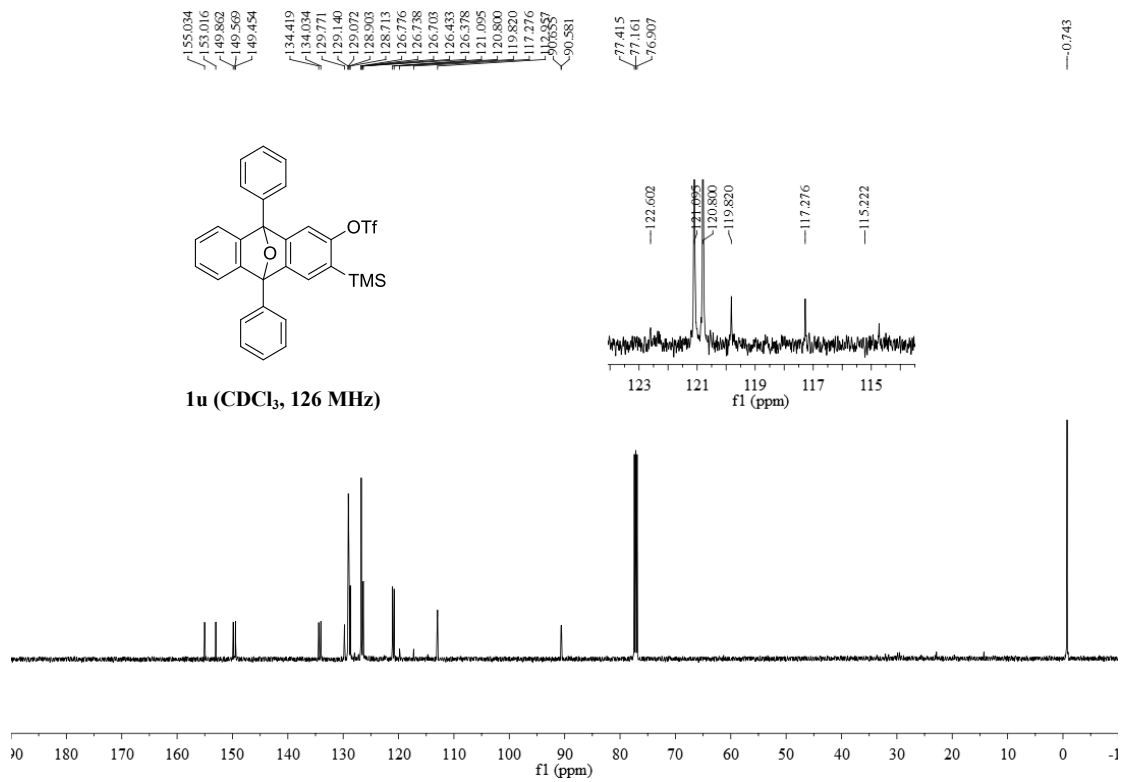

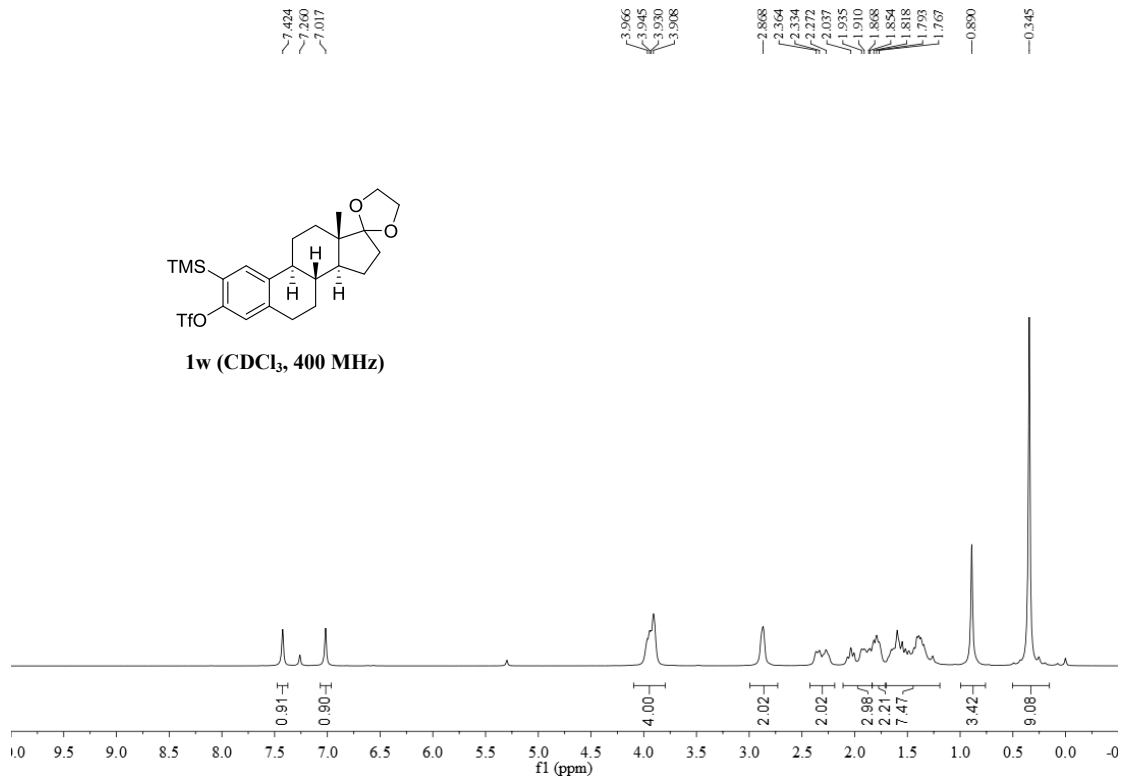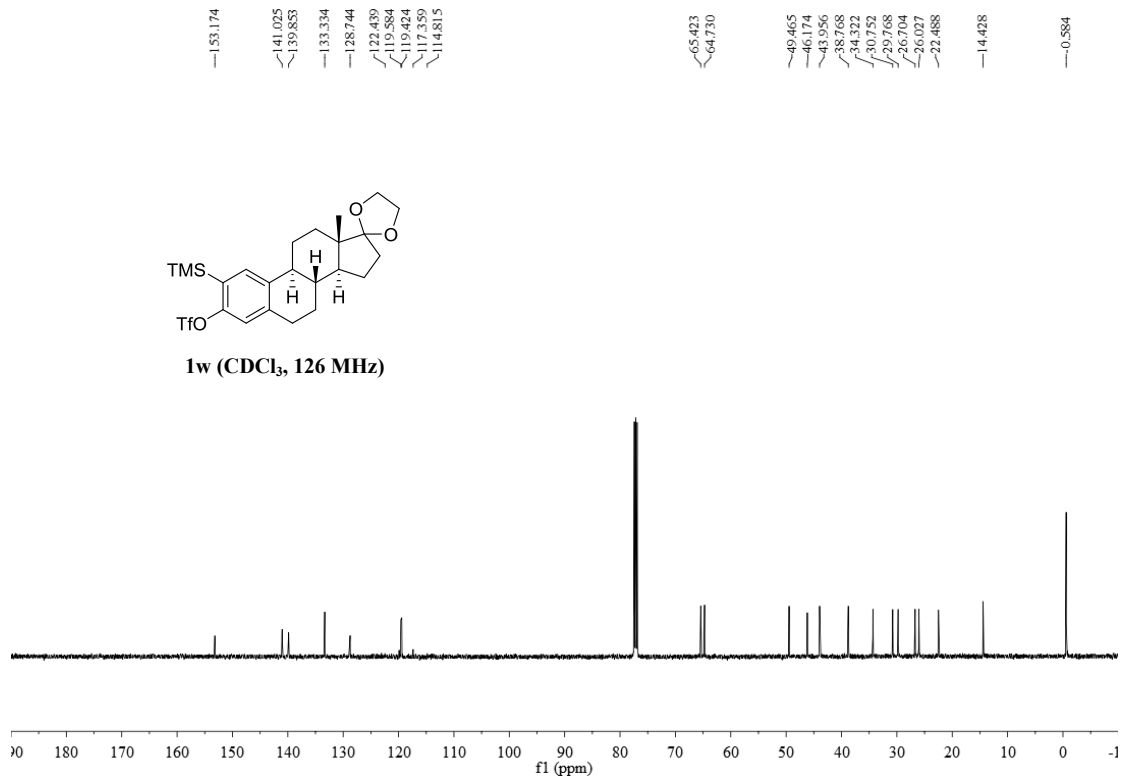

8.772  
8.766  
8.738  
8.739  
8.742  
8.078  
8.056  
7.922  
7.913  
7.905  
7.898  
7.844  
7.822  
7.684  
7.679  
7.667  
7.638  
7.600

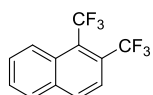

2a (CDCl<sub>3</sub>, 400 MHz)

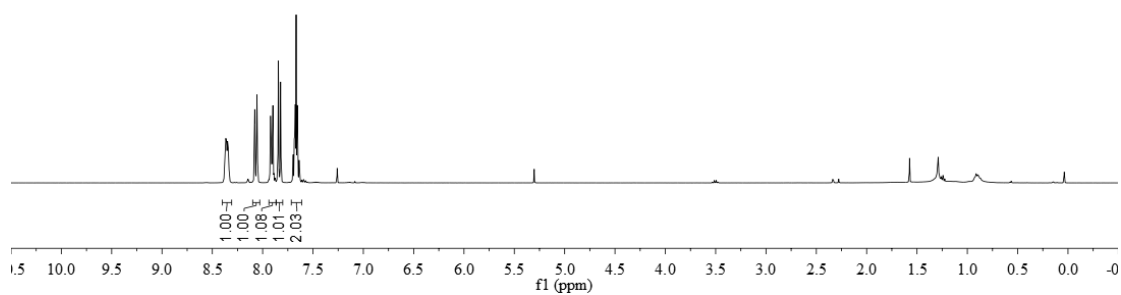

-53.655  
-53.659  
-53.690  
-53.695  
-53.725  
-53.730  
-53.761  
-53.766

-57.503  
-57.628  
-57.664  
-57.699

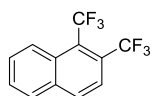

2a (CDCl<sub>3</sub>, 470 MHz)

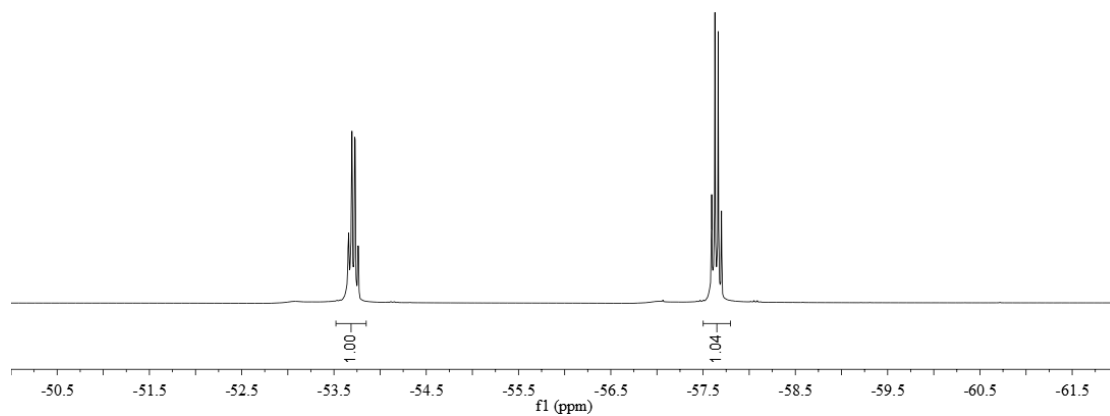

135.198  
133.101  
130.113  
130.090  
128.668  
128.504  
127.982  
127.785  
127.584  
127.477  
127.455  
127.151  
127.130  
126.826  
126.356  
126.372  
126.325  
126.178  
126.131  
126.036  
125.697  
125.377  
125.042  
124.855  
122.708  
122.700  
122.701  
122.132  
122.064  
119.855  
119.402

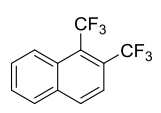

2a (CDCl<sub>3</sub>, 101 MHz)

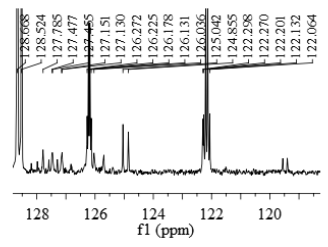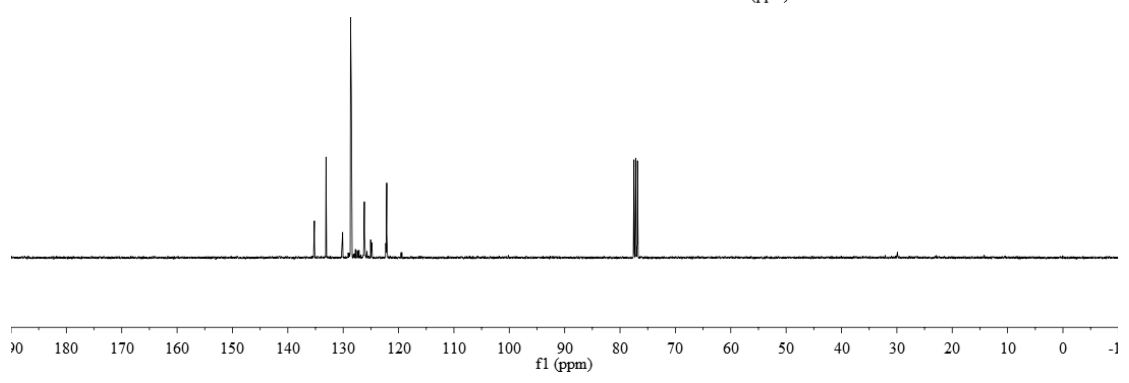

7.950  
7.932  
7.785  
7.774  
7.766  
7.756  
7.748  
7.681  
7.676  
7.669  
7.664  
7.560  
7.562  
7.306  
7.301  
7.286  
7.288  
7.285  
7.279  
7.260

—3.954

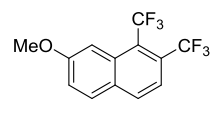

2b (CDCl<sub>3</sub>, 500 MHz)

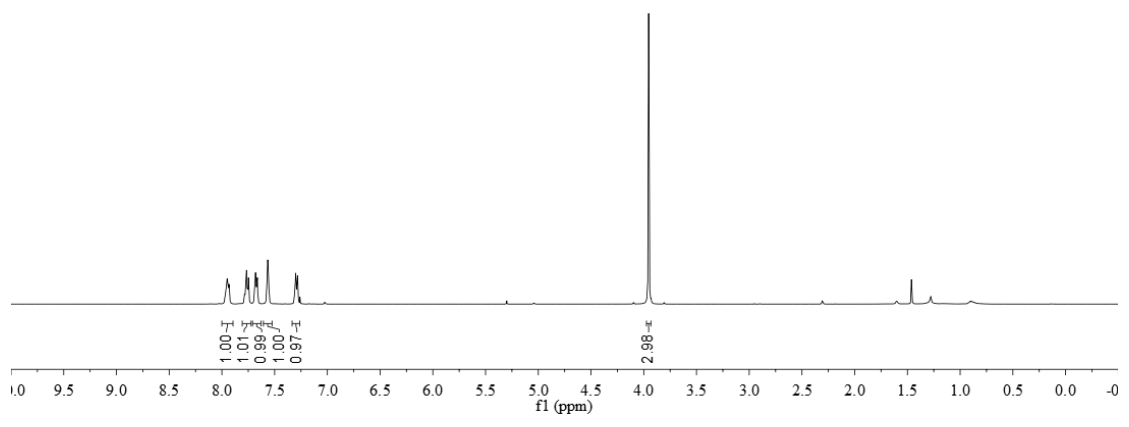

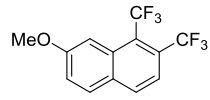

2b (CDCl<sub>3</sub>, 470 MHz)

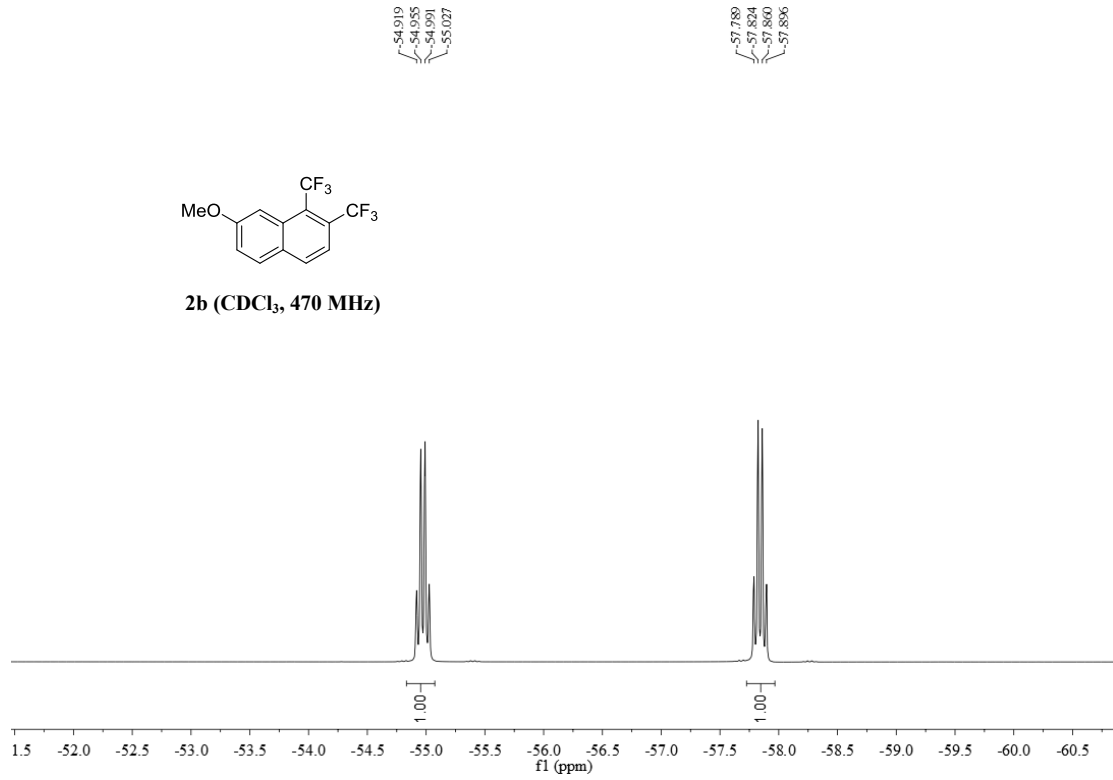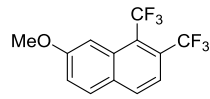

2b (CDCl<sub>3</sub>, 126 MHz)

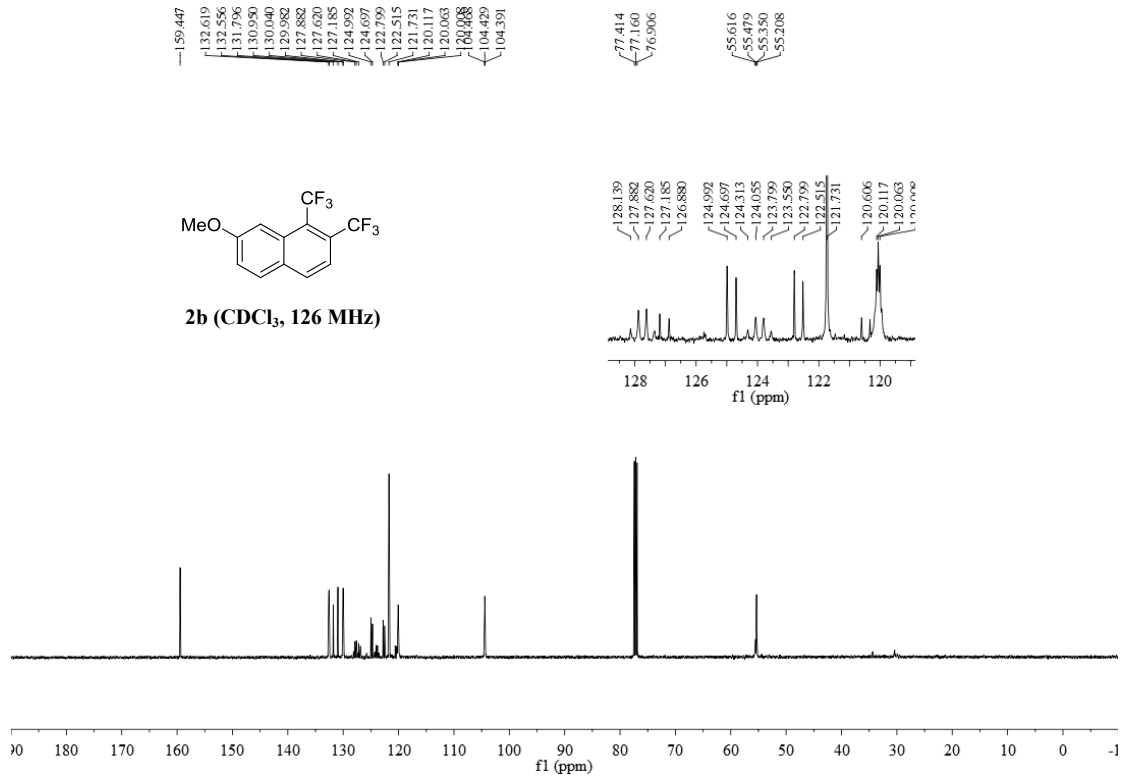



8.329  
7.977  
7.971  
7.965  
7.735  
7.729  
7.723

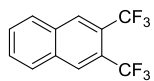

2c (CDCl<sub>3</sub>, 500 MHz)

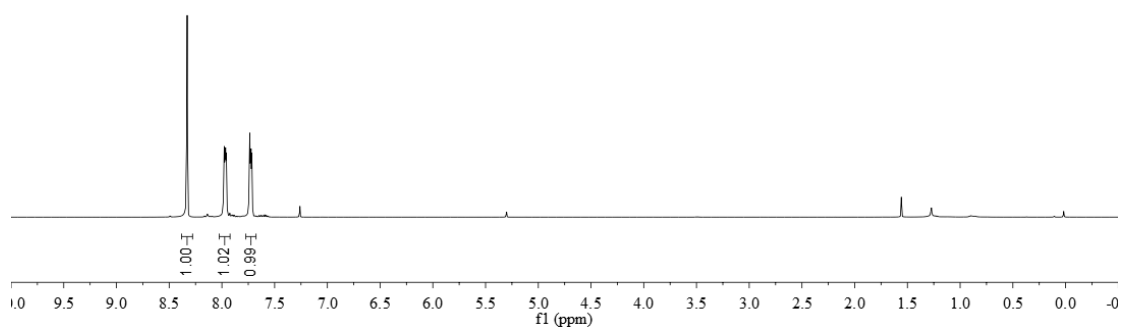

60.085

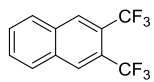

2c (CDCl<sub>3</sub>, 470 MHz)

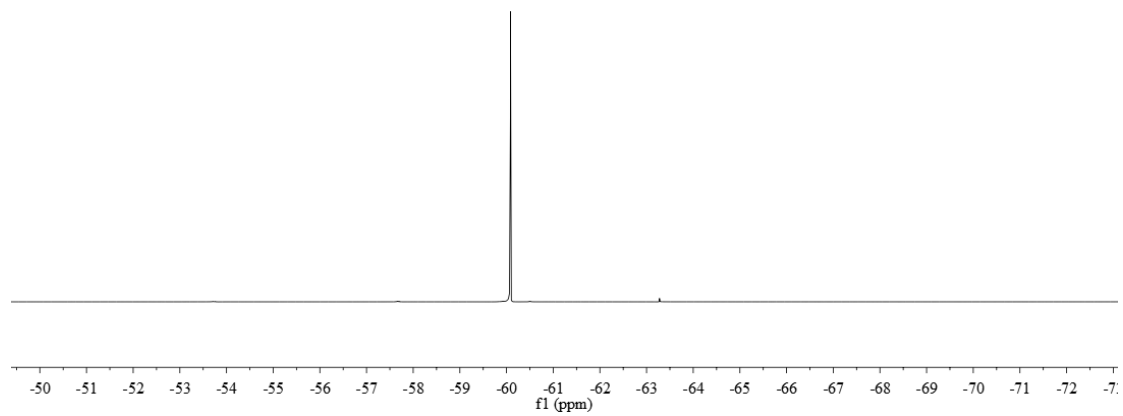

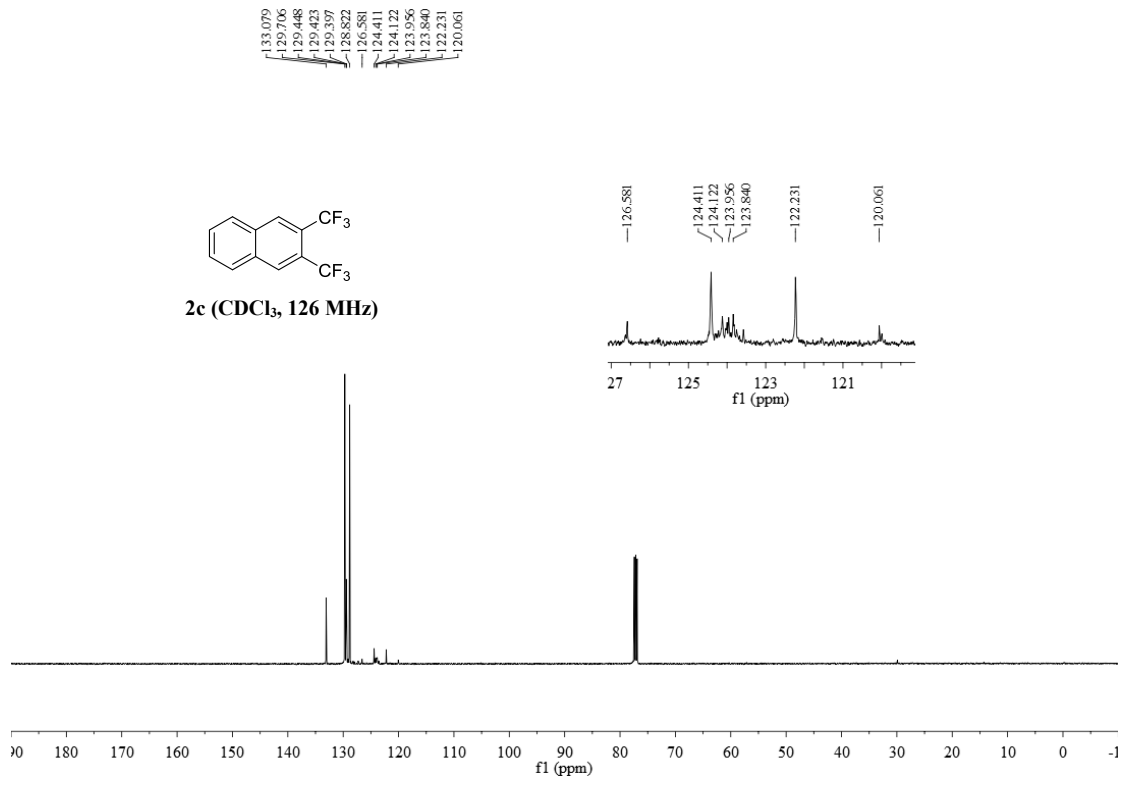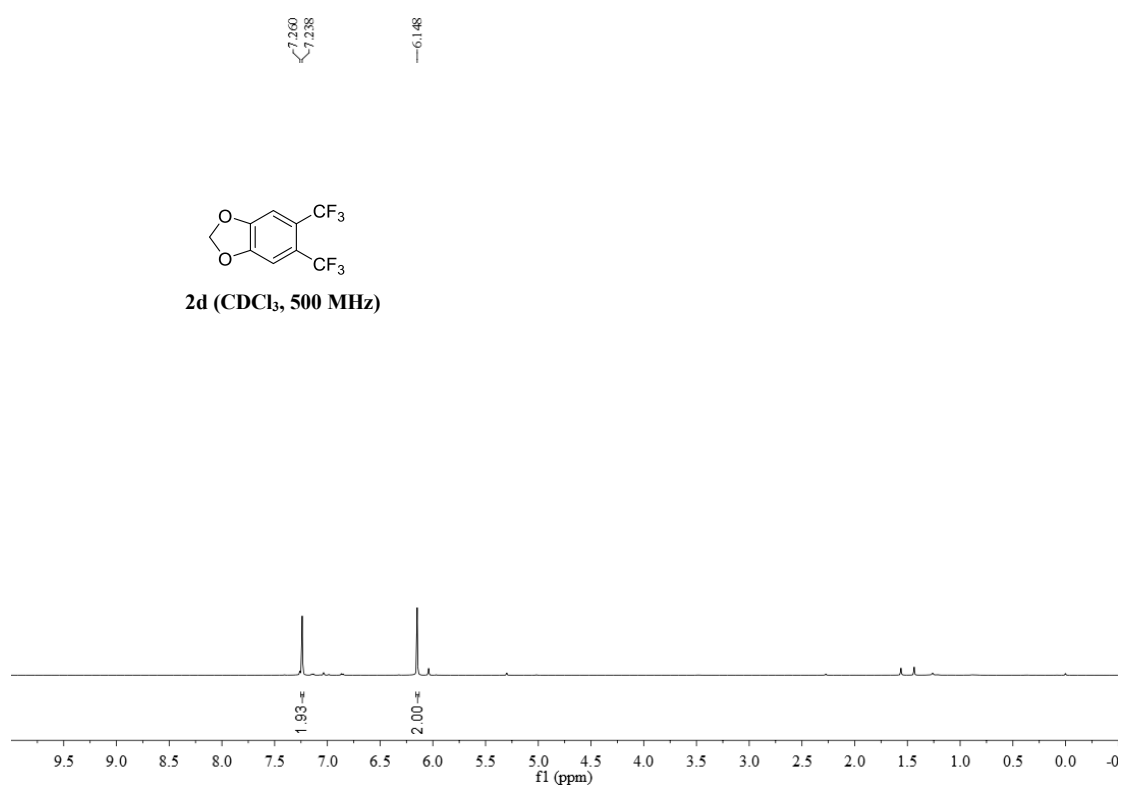

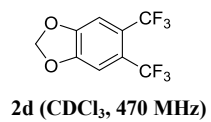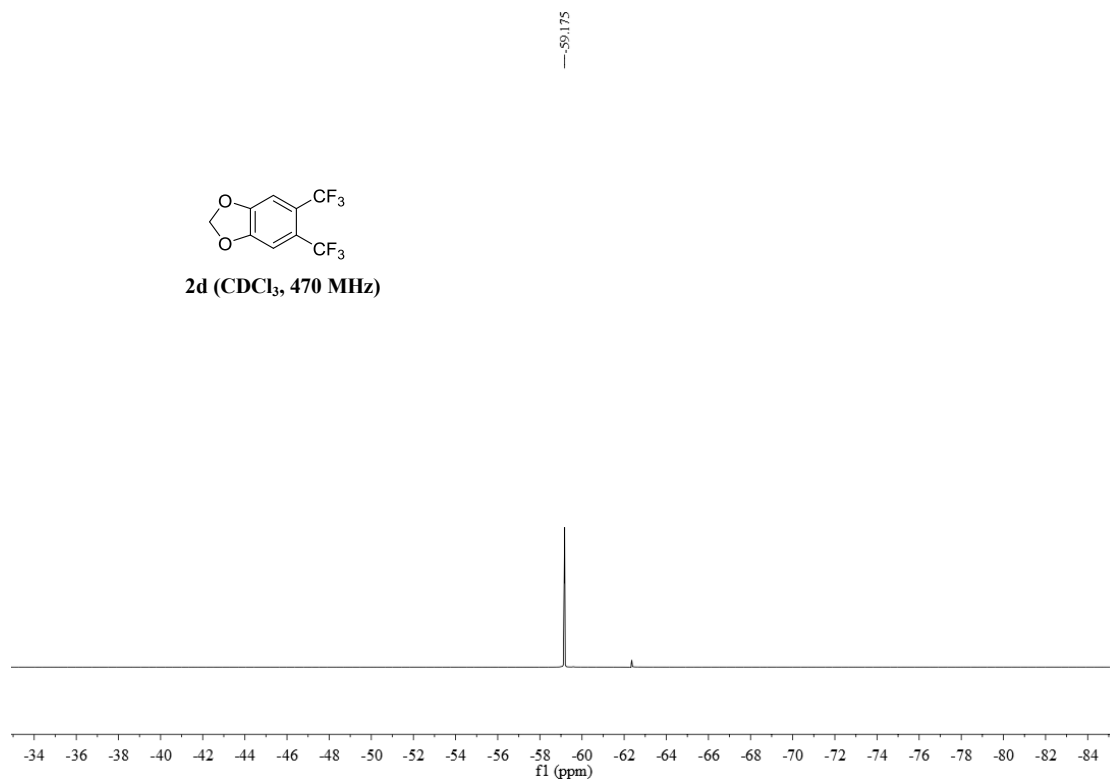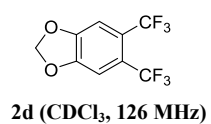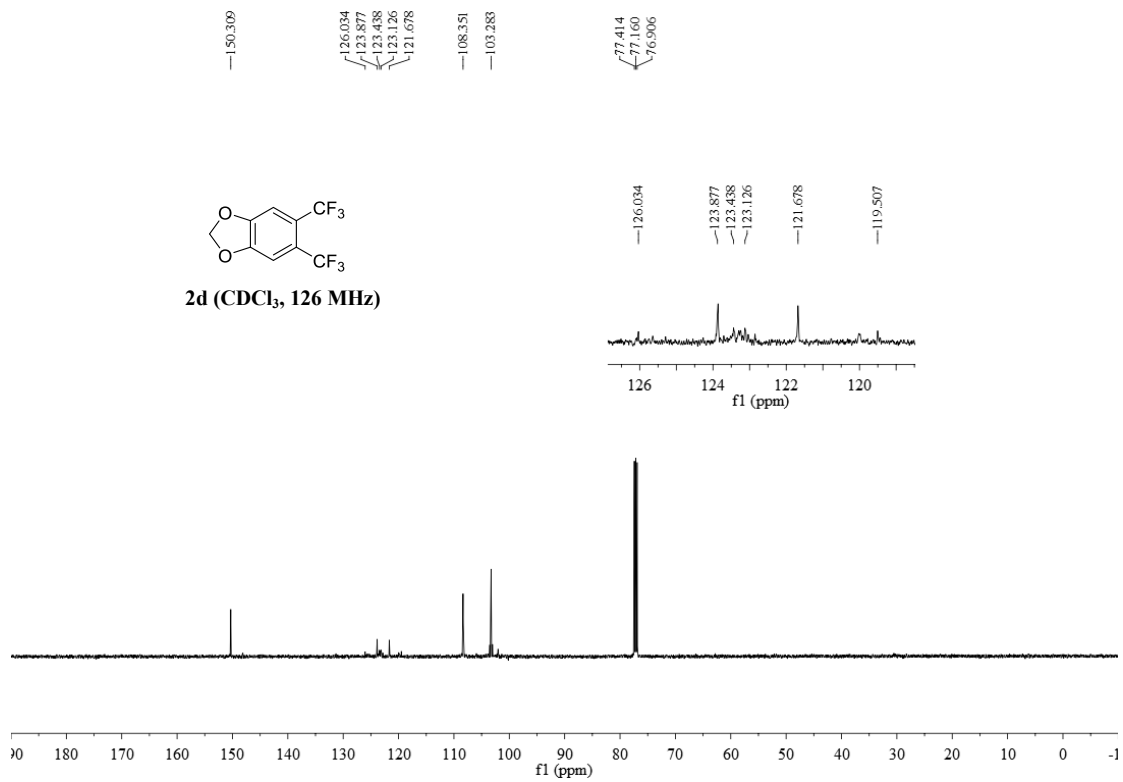

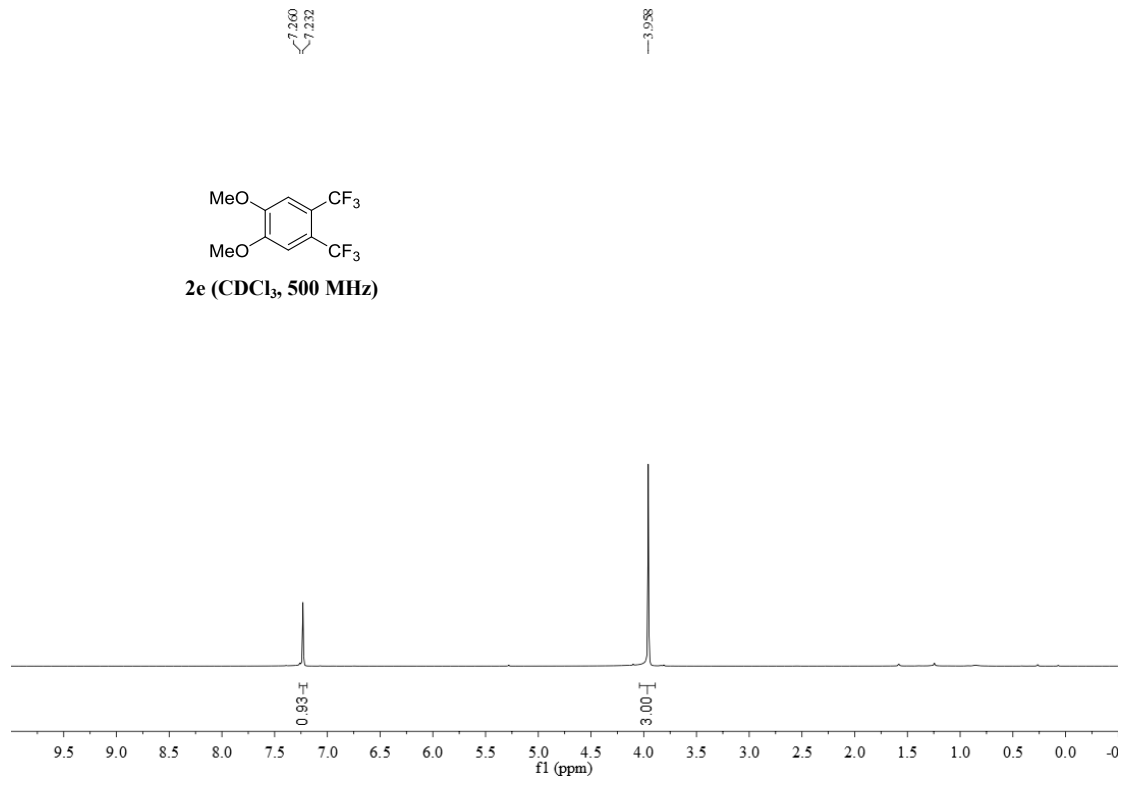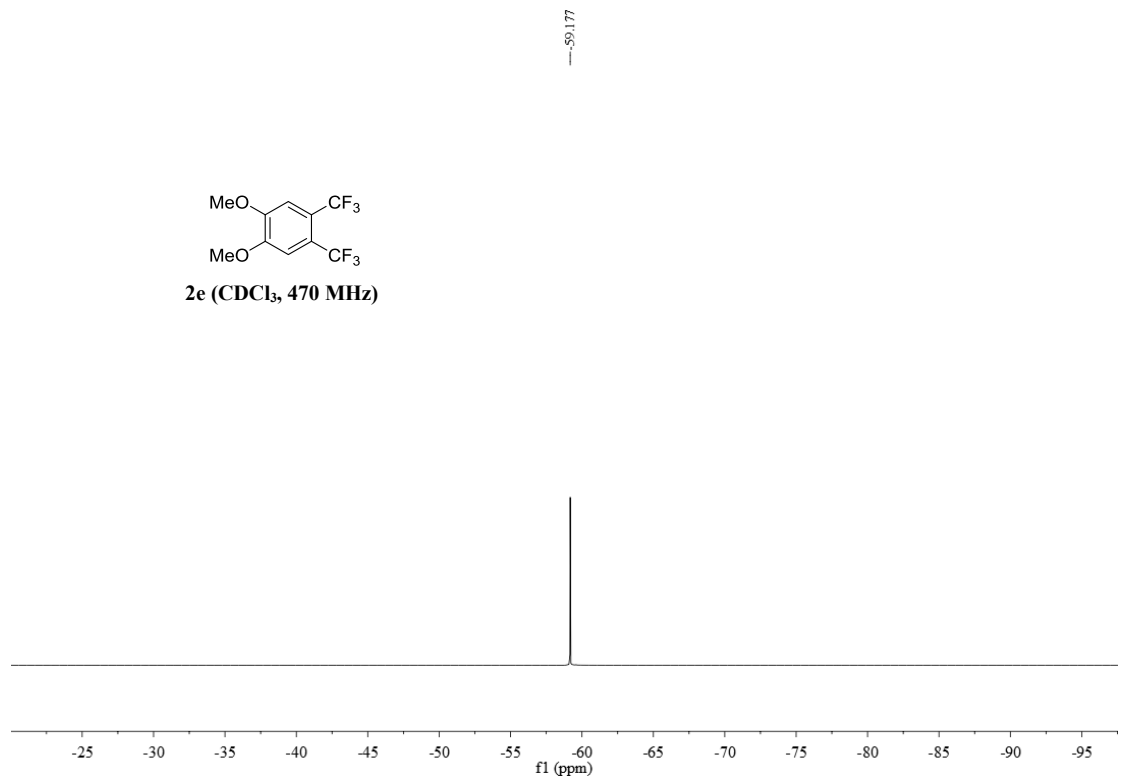

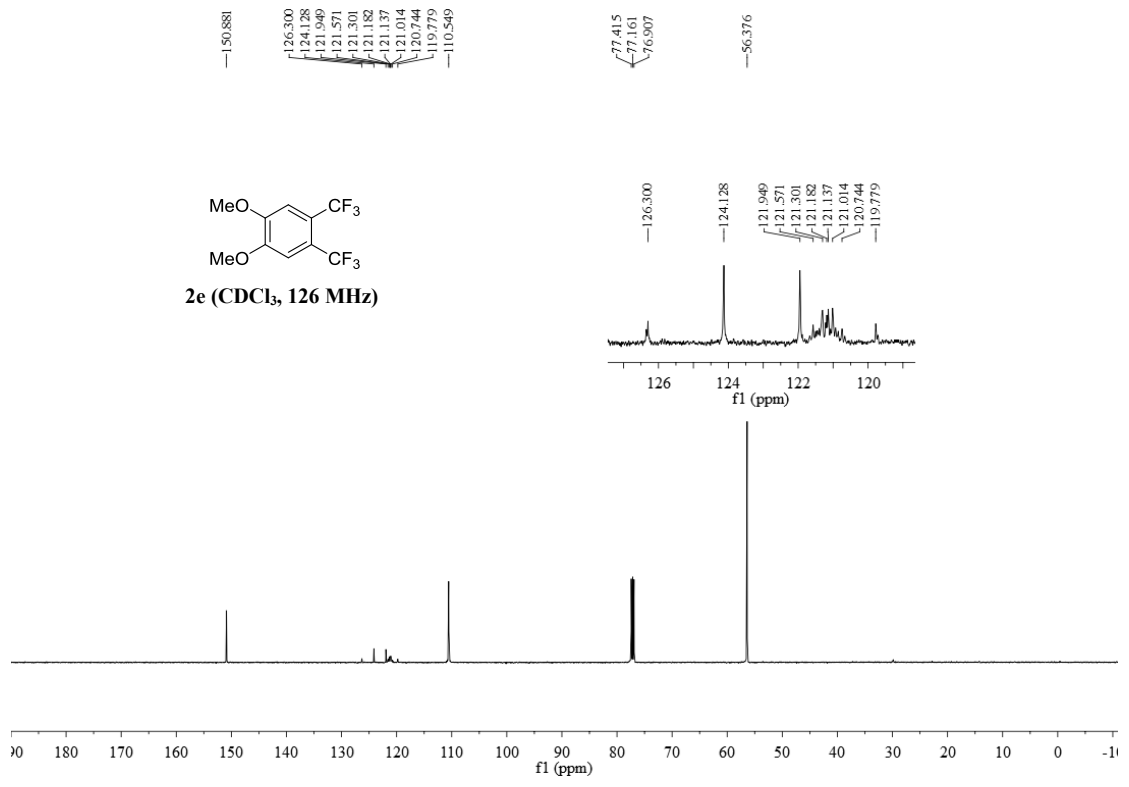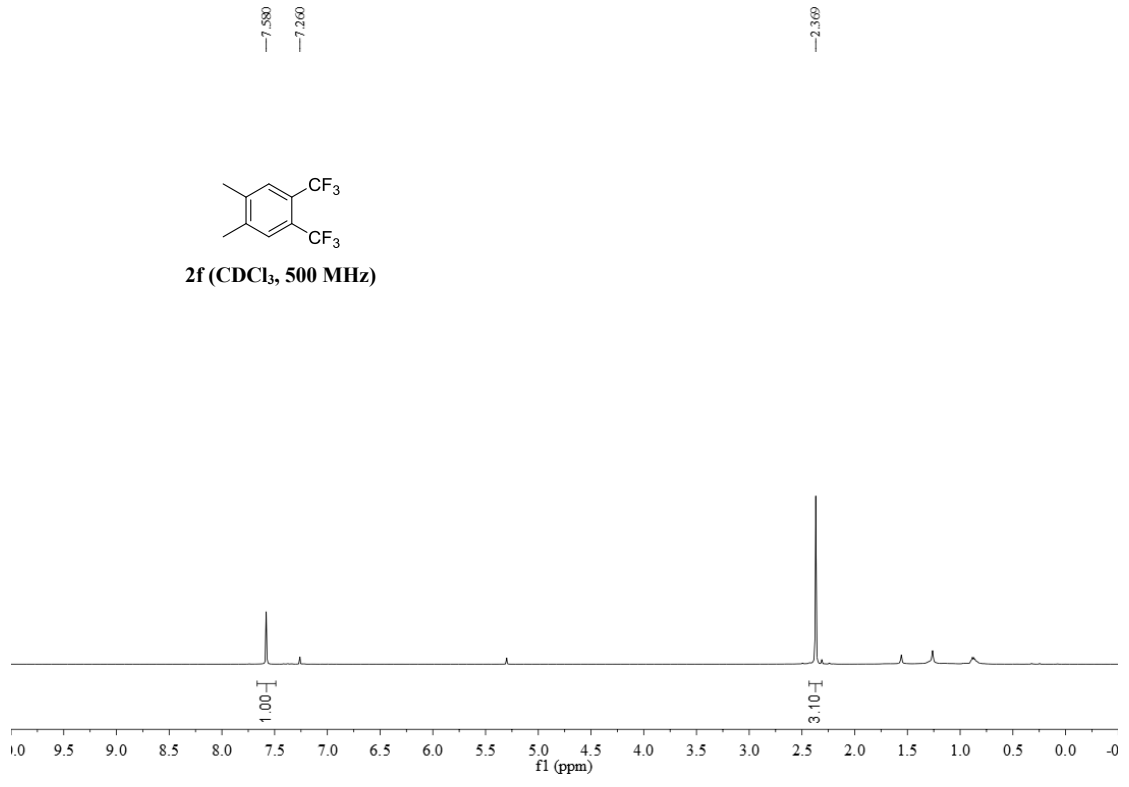

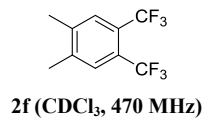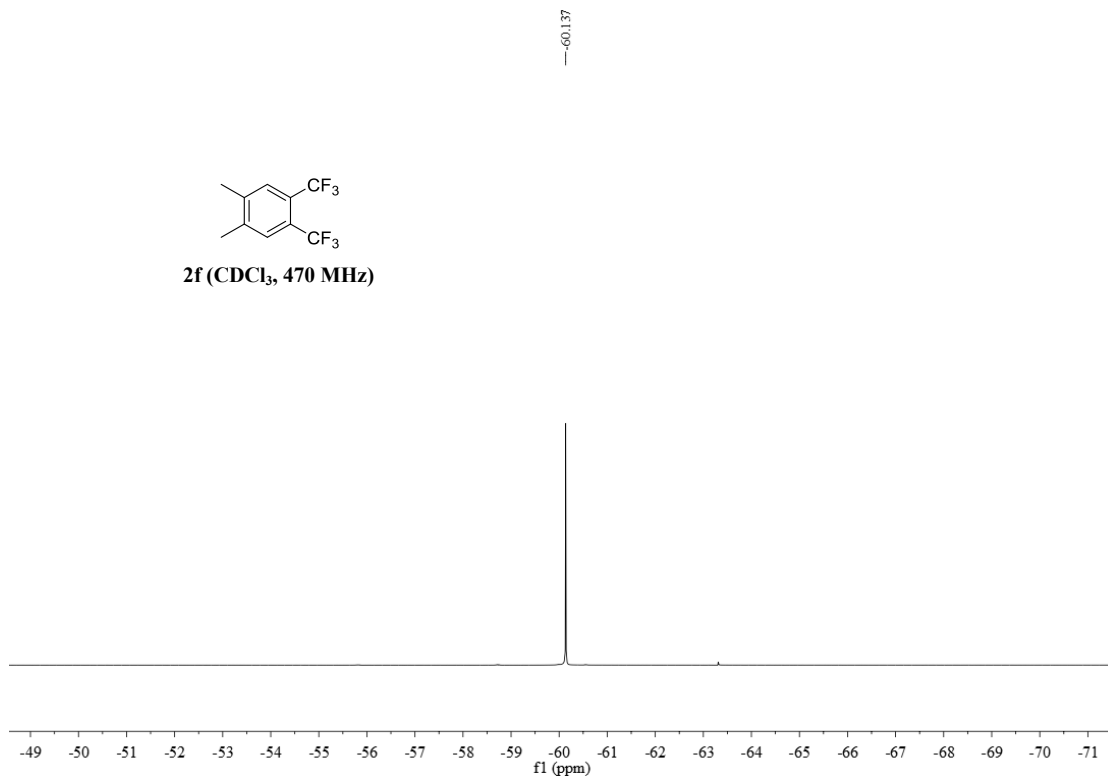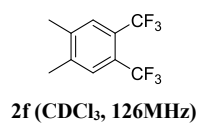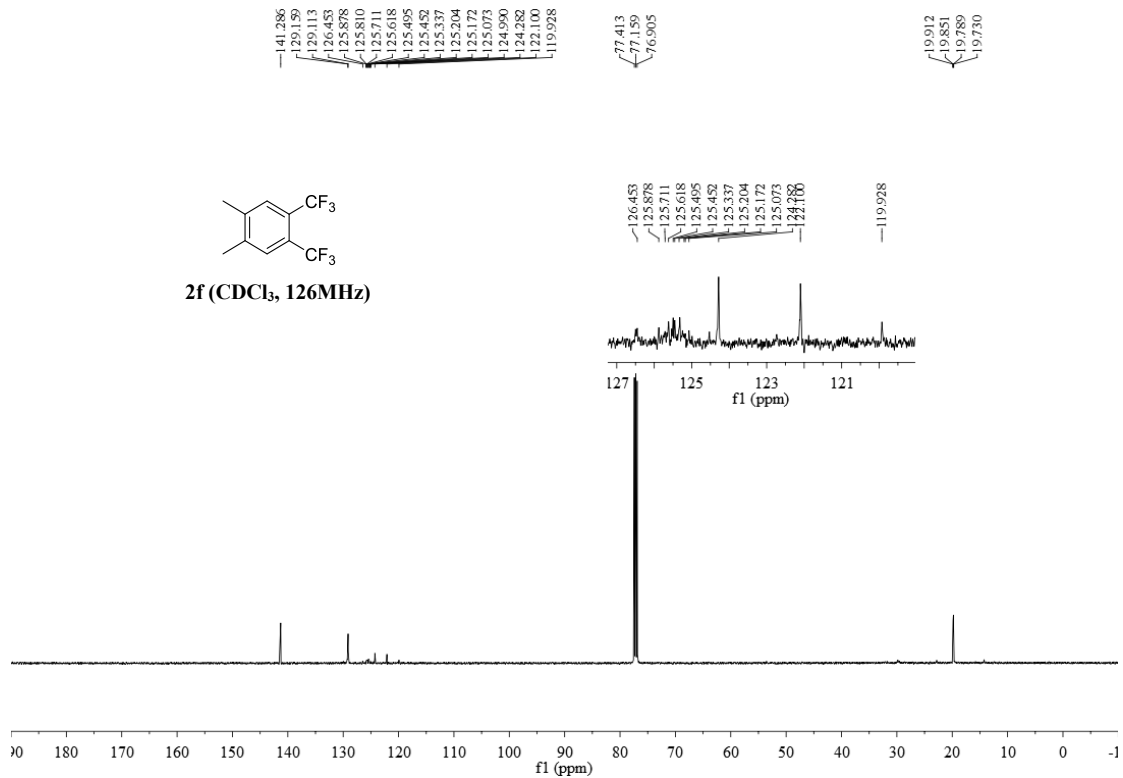

7.584  
7.568  
7.538  
7.521  
7.500

2.972  
2.893

1.811  
1.805  
1.799

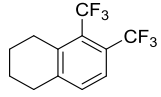

2g (CDCl<sub>3</sub>, 500 MHz)

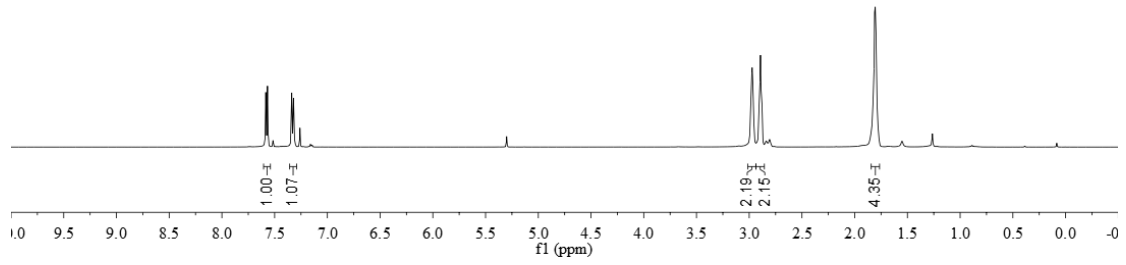

-56.165  
-56.200  
-56.236  
-56.271

-58.581  
-58.616  
-58.652  
-58.687

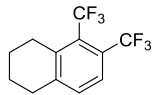

2g (CDCl<sub>3</sub>, 470 MHz)

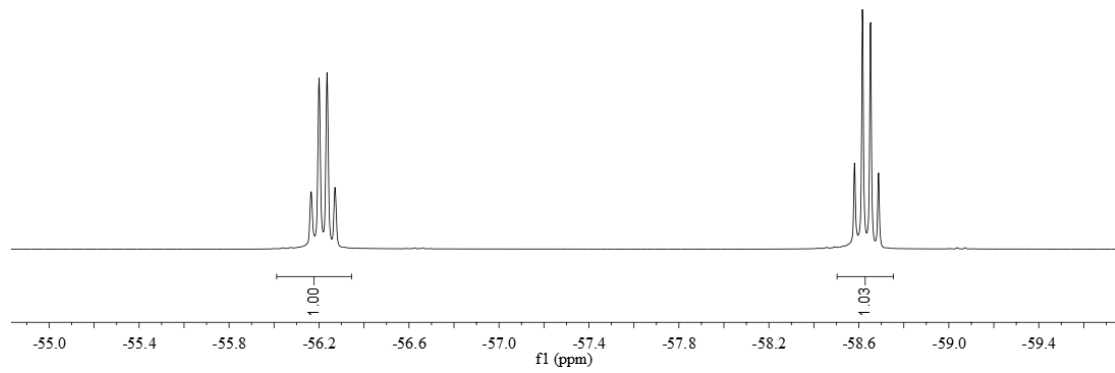

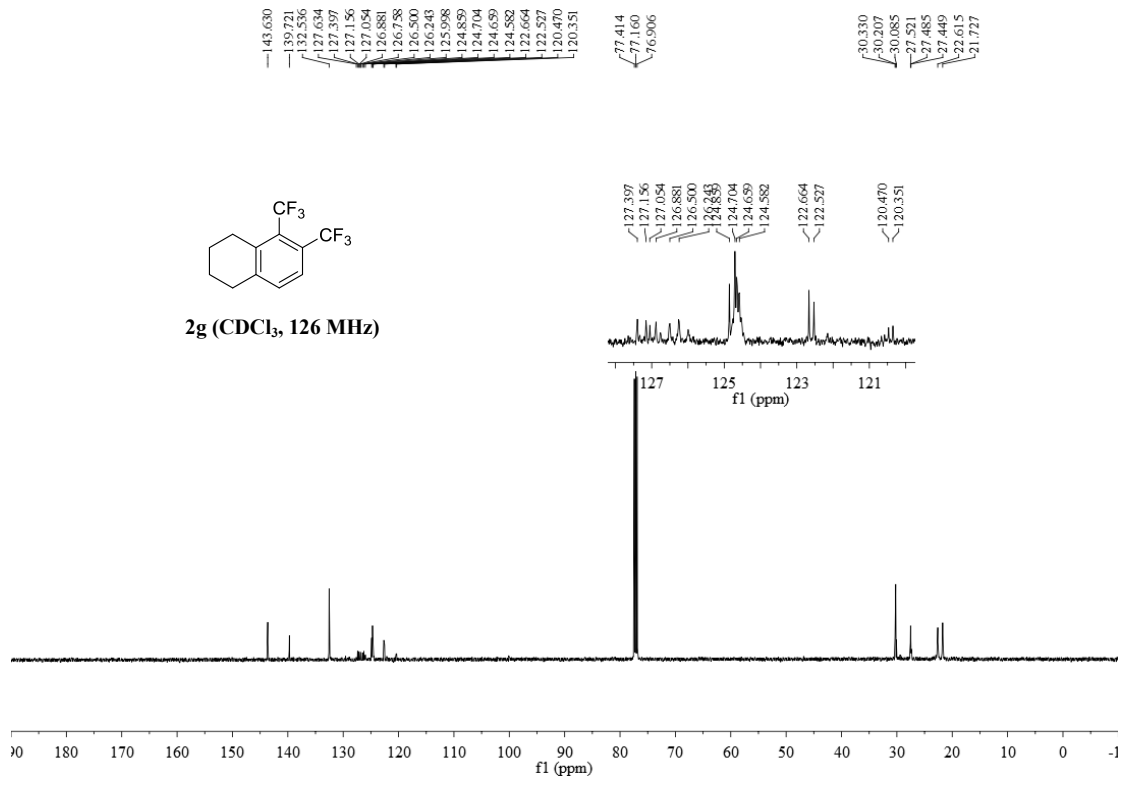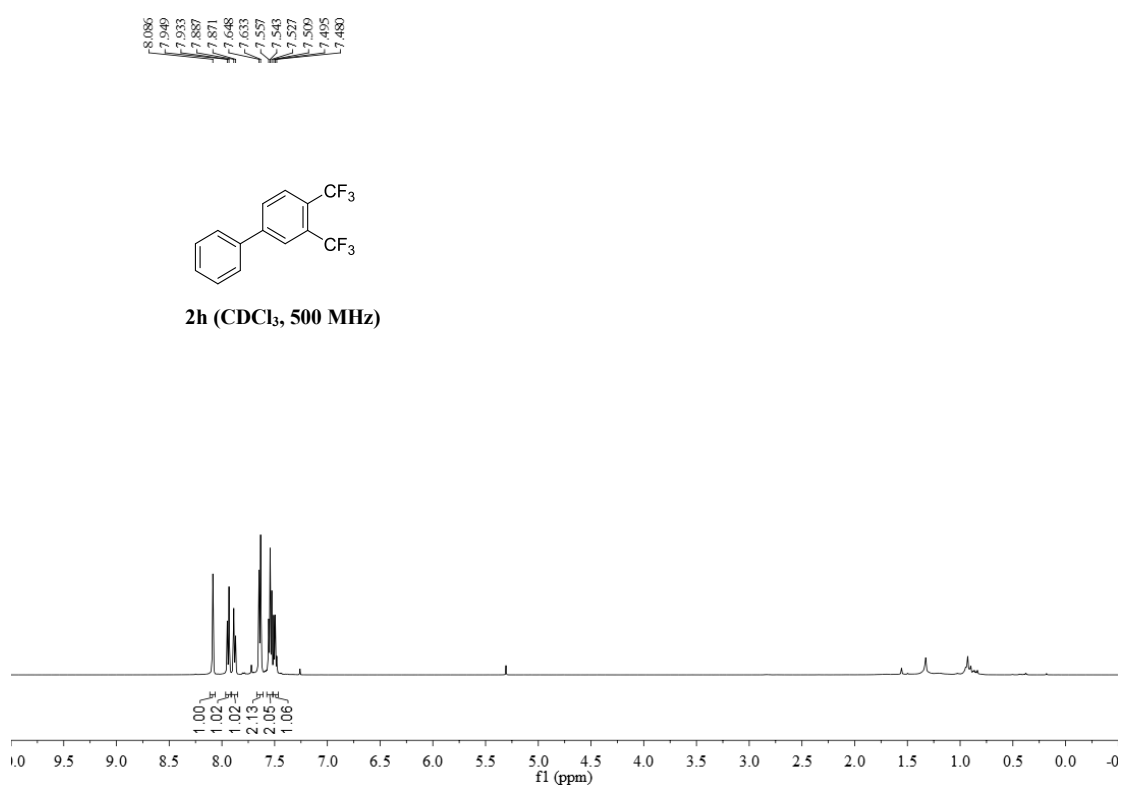



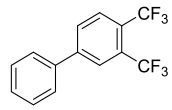

2h (CDCl<sub>3</sub>, 470 MHz)

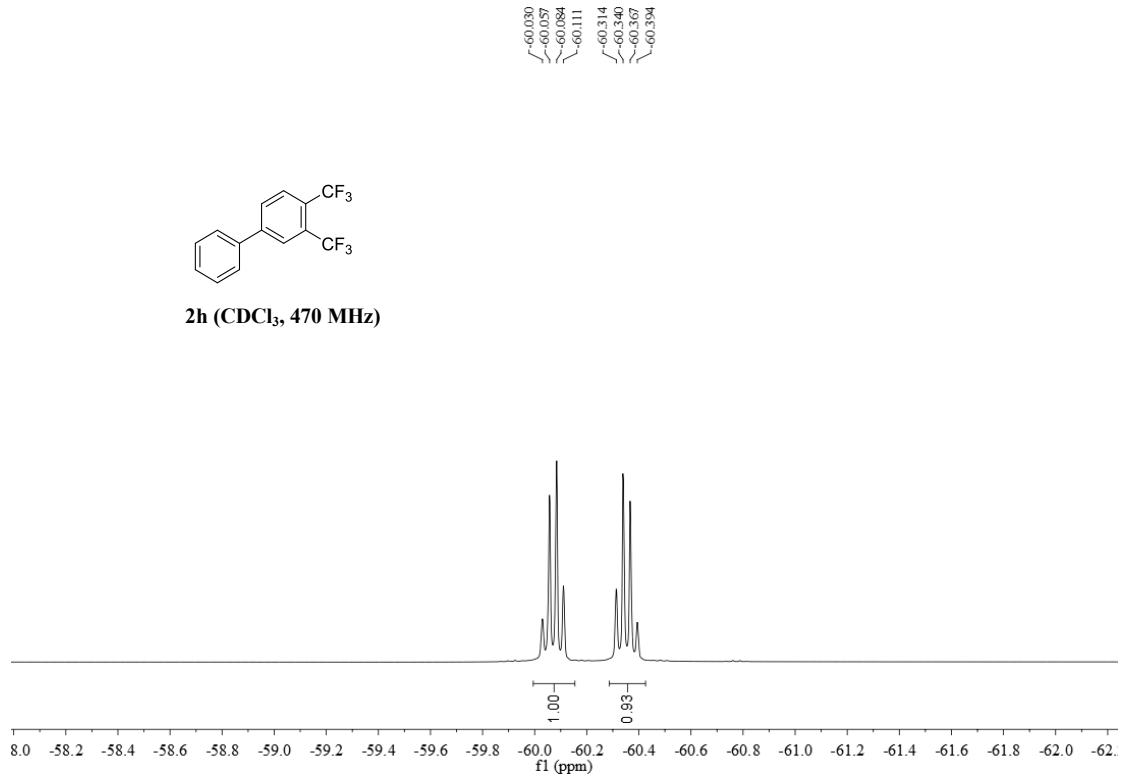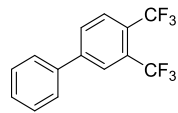

2h (CDCl<sub>3</sub>, 126 MHz)

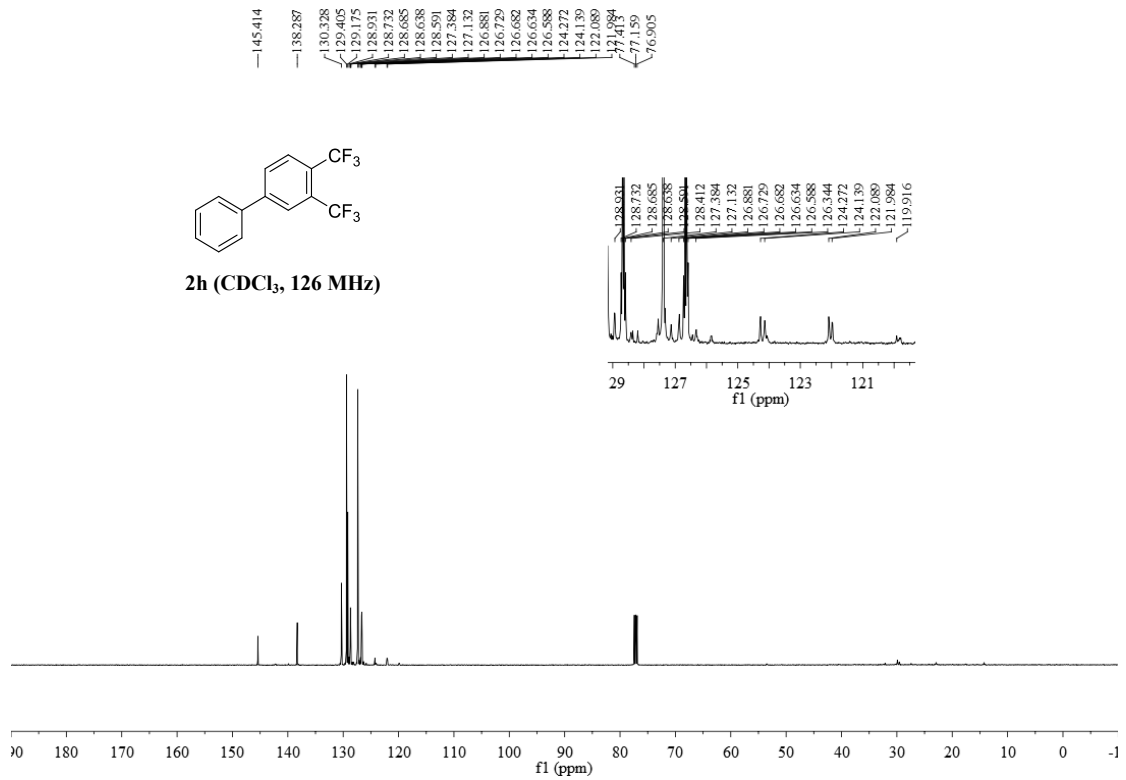

8.009  
7.928  
7.908  
7.888  
7.818  
7.615  
7.602  
7.593  
7.580  
7.724  
7.702  
7.181

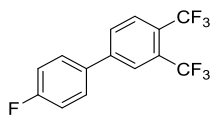

2i (CDCl<sub>3</sub>, 400 MHz)

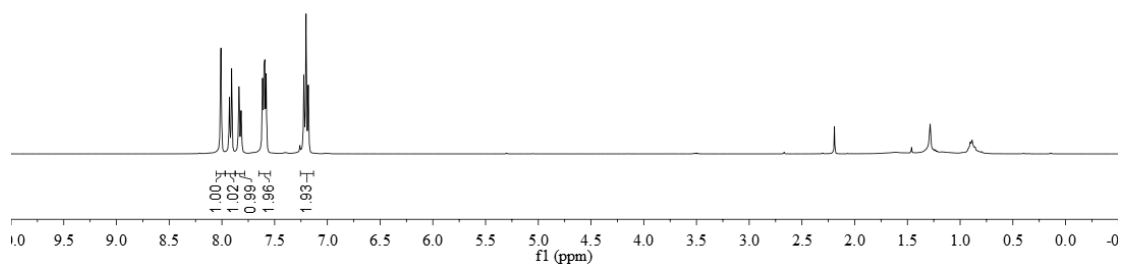

61.242  
61.276  
61.310  
61.342  
61.329  
61.561  
61.595  
61.629

114.660  
114.674  
114.683  
114.696  
114.710  
114.718  
114.732

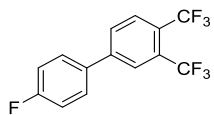

2i (CDCl<sub>3</sub>, 376 MHz)

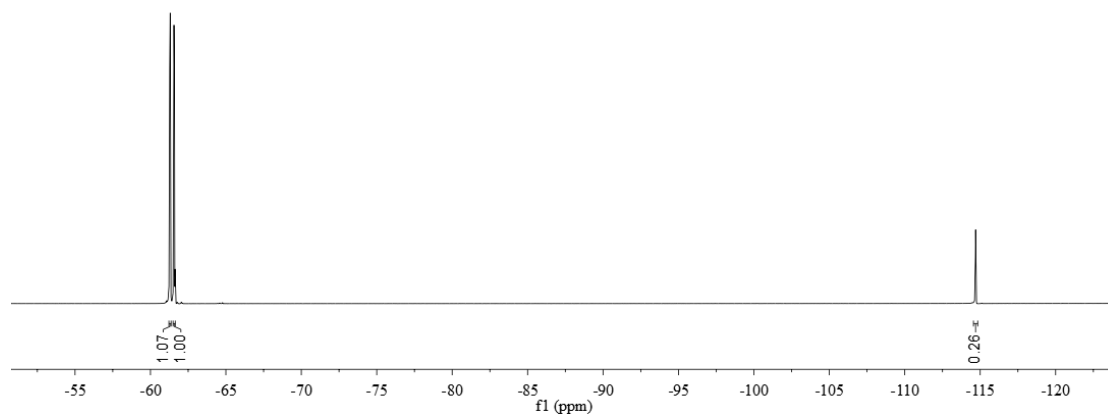

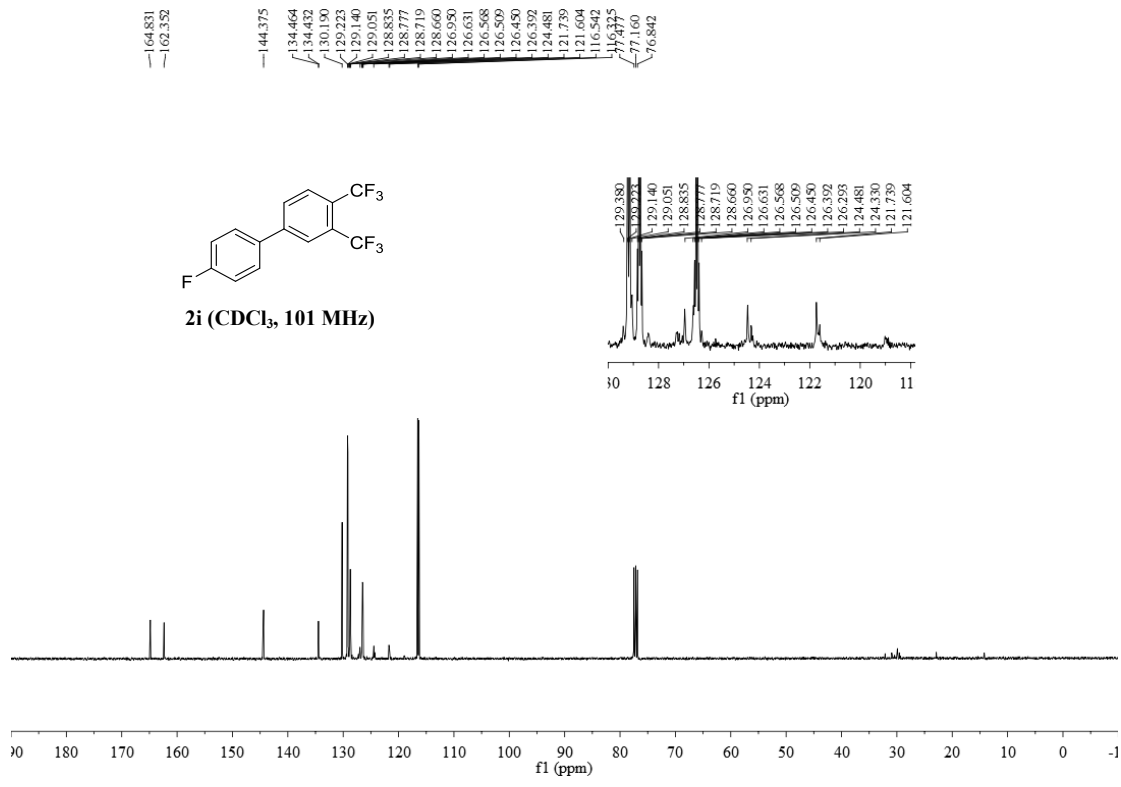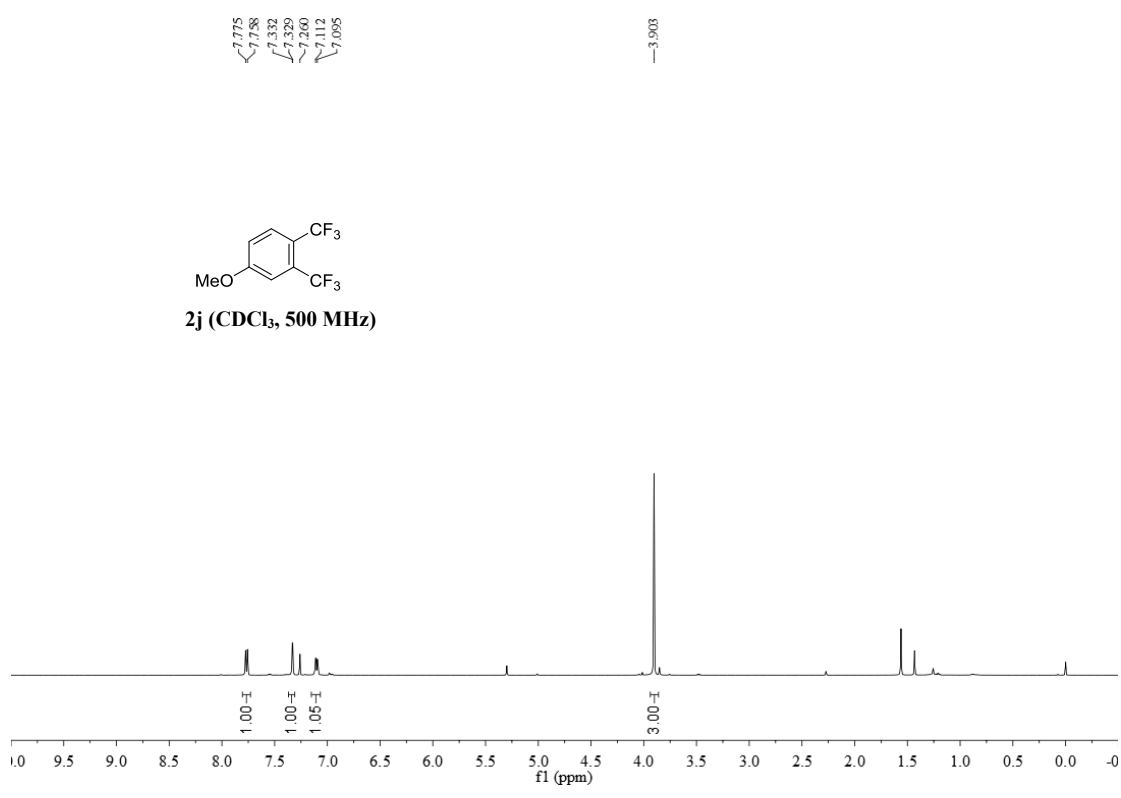

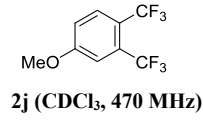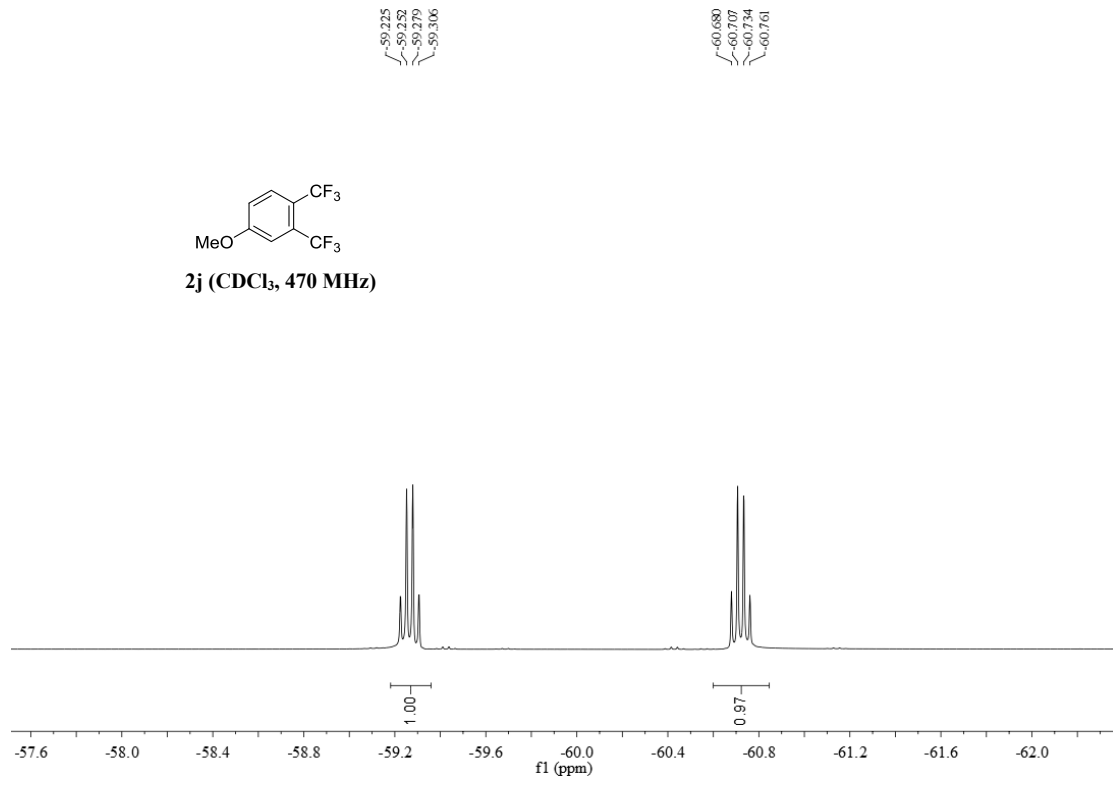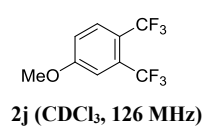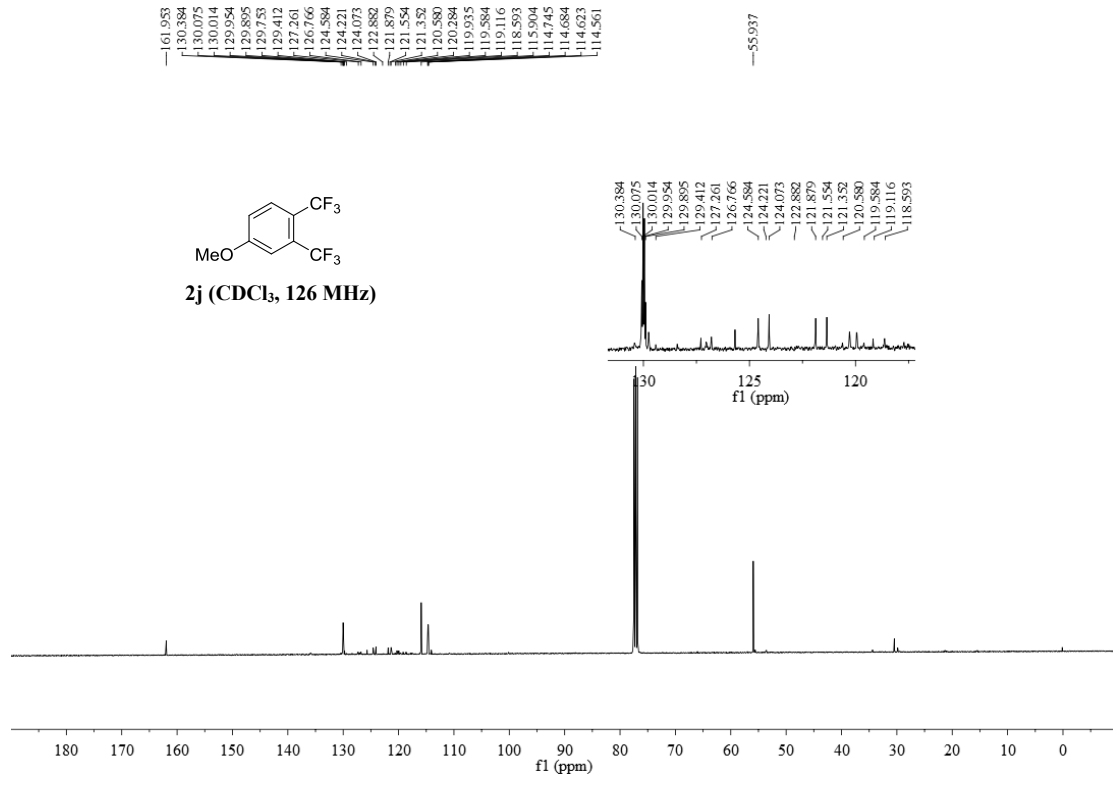

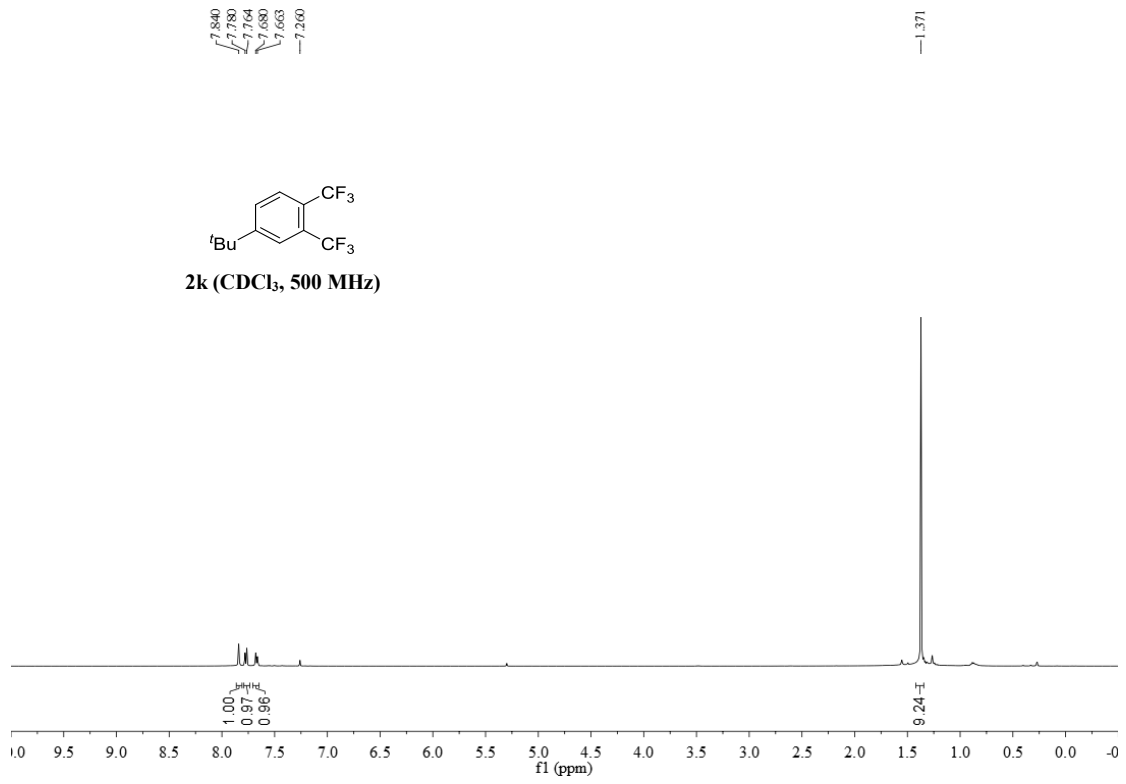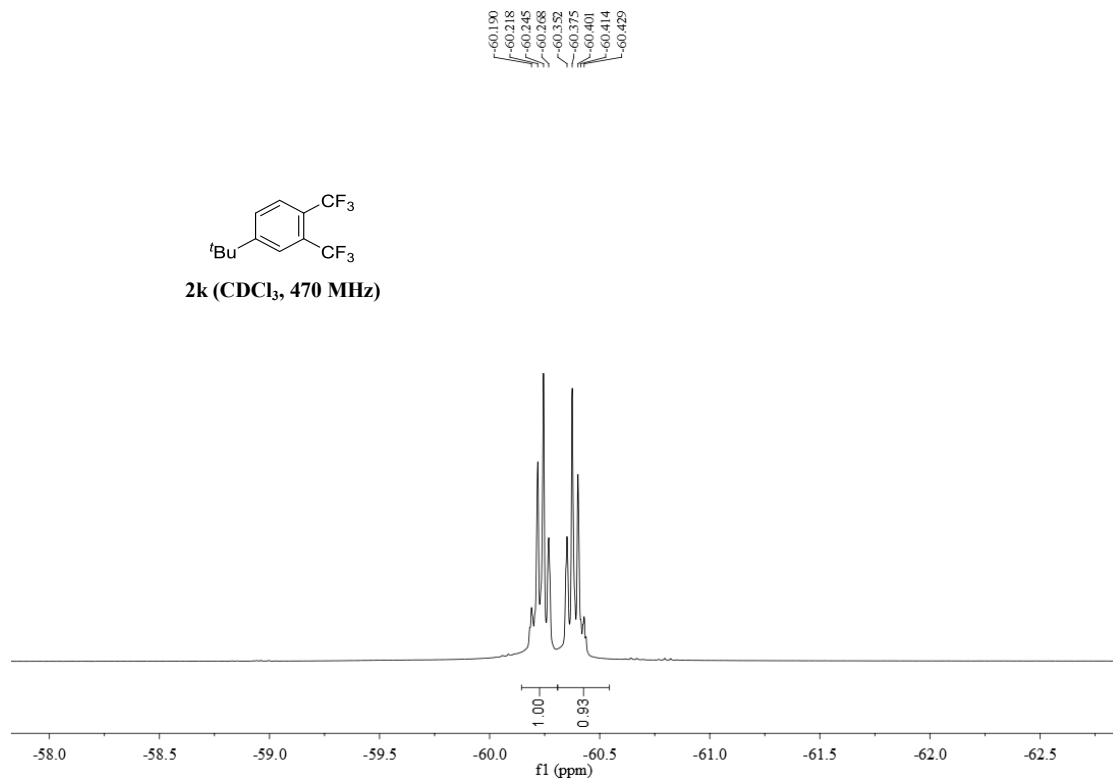

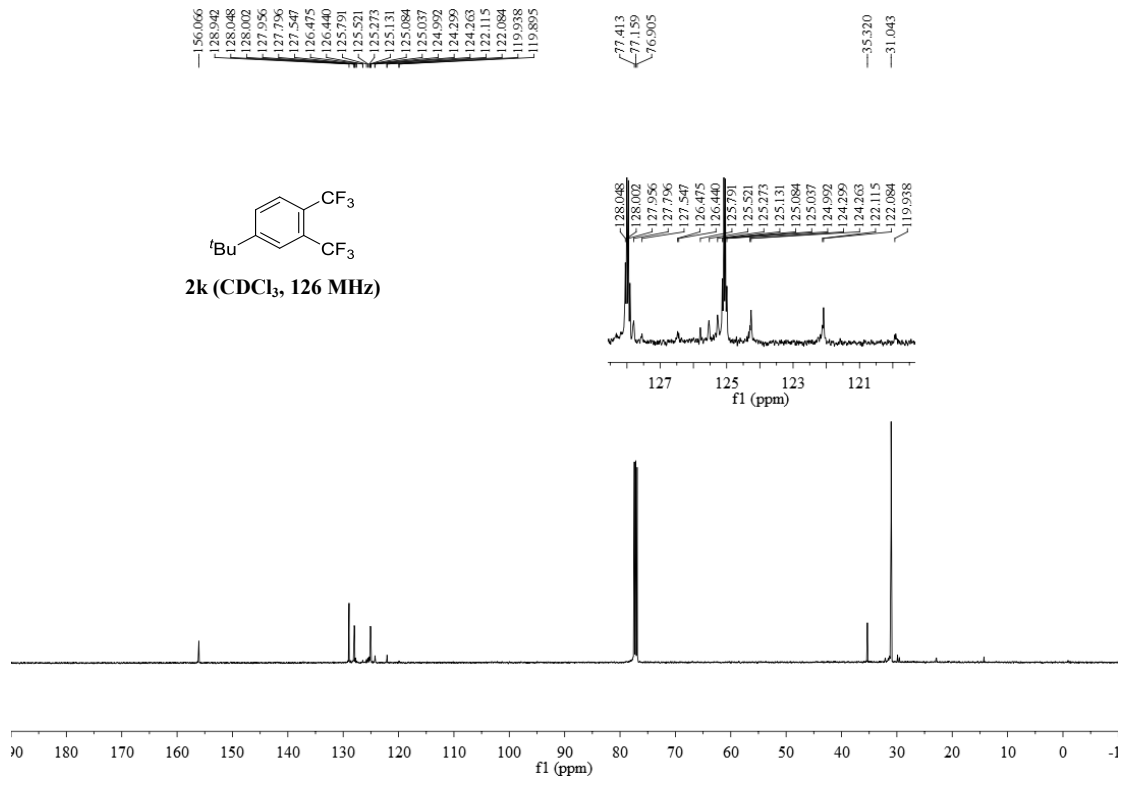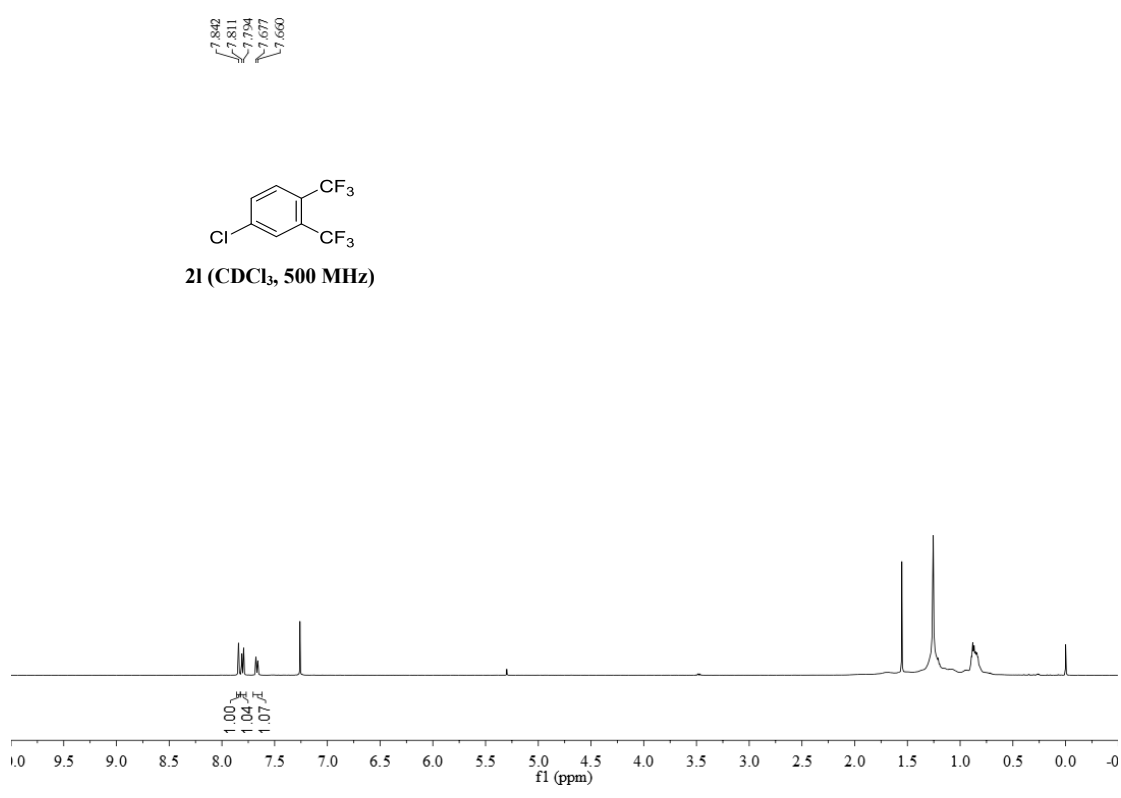

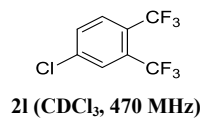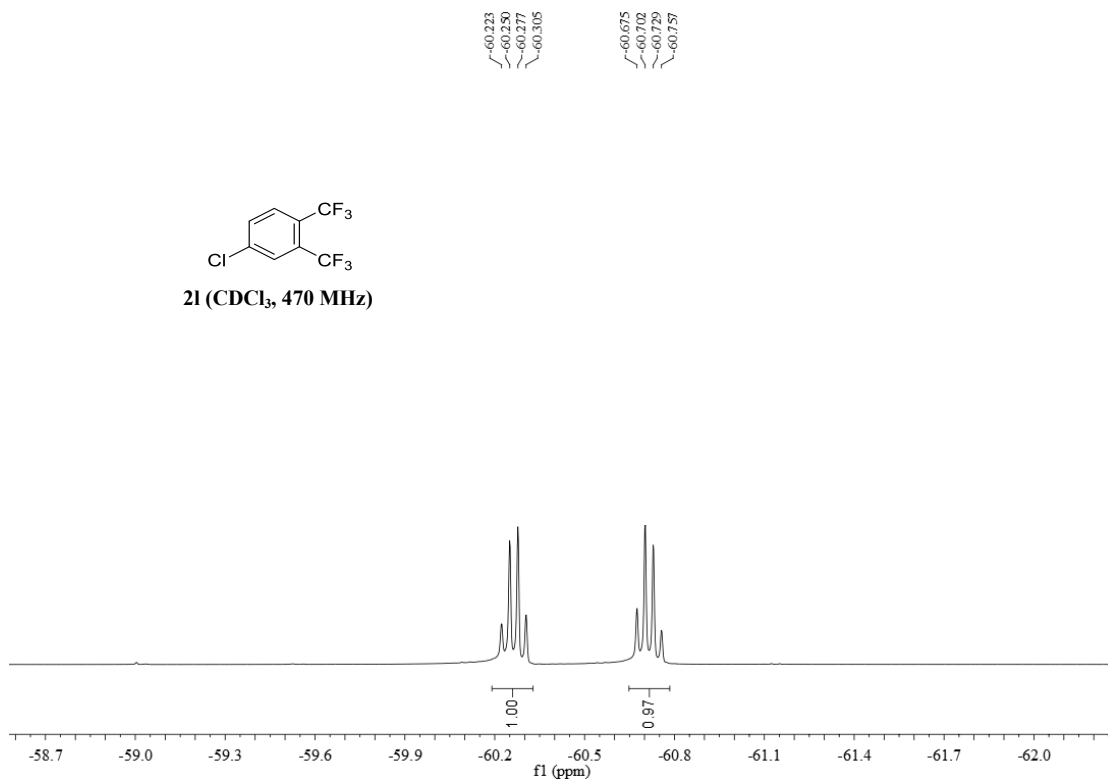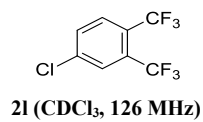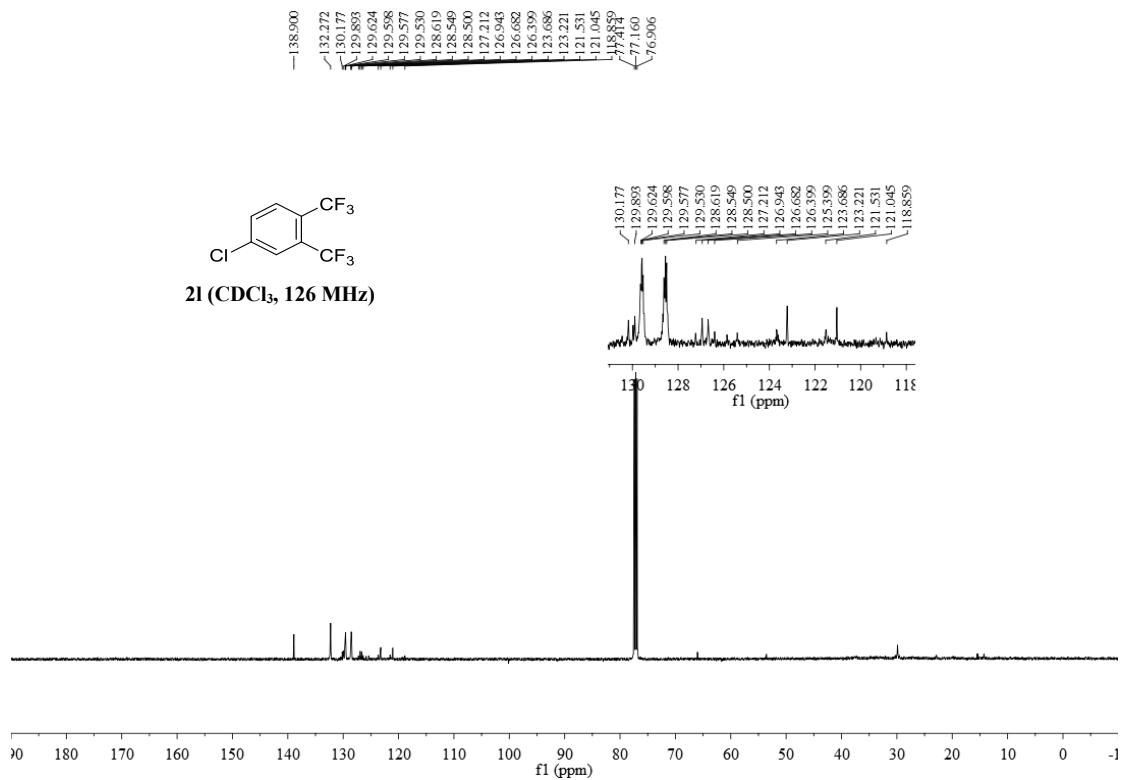

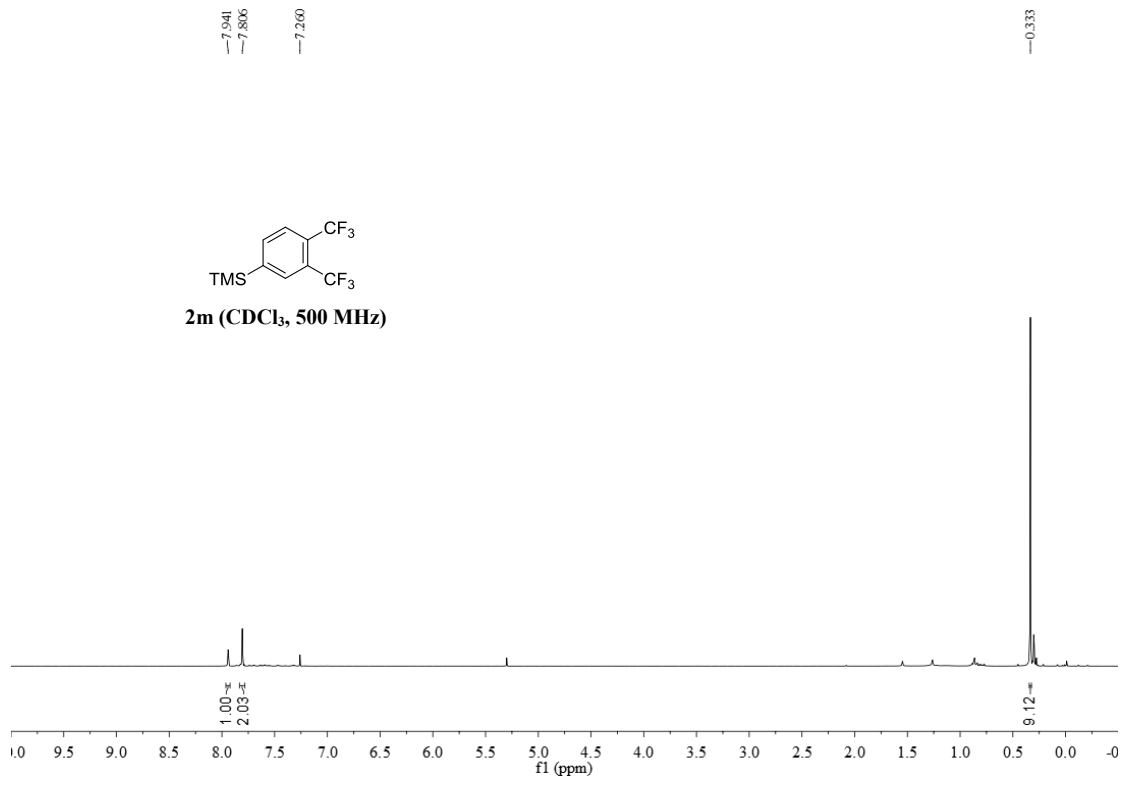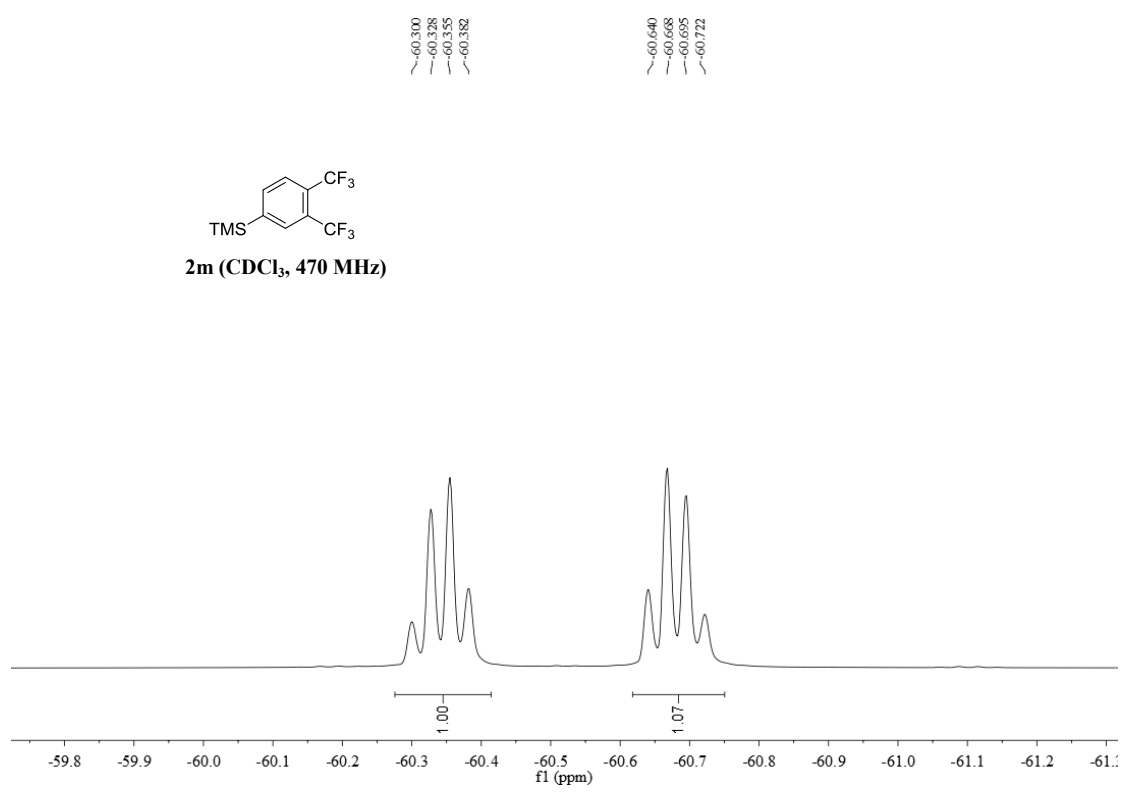



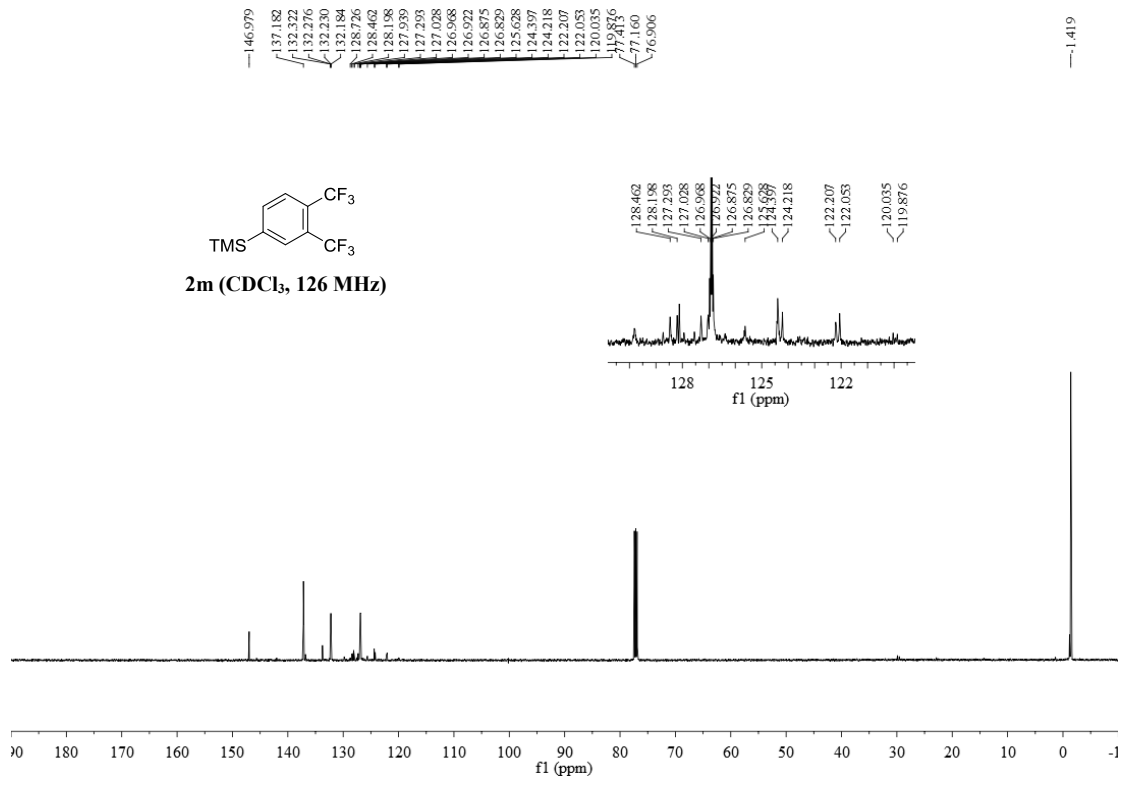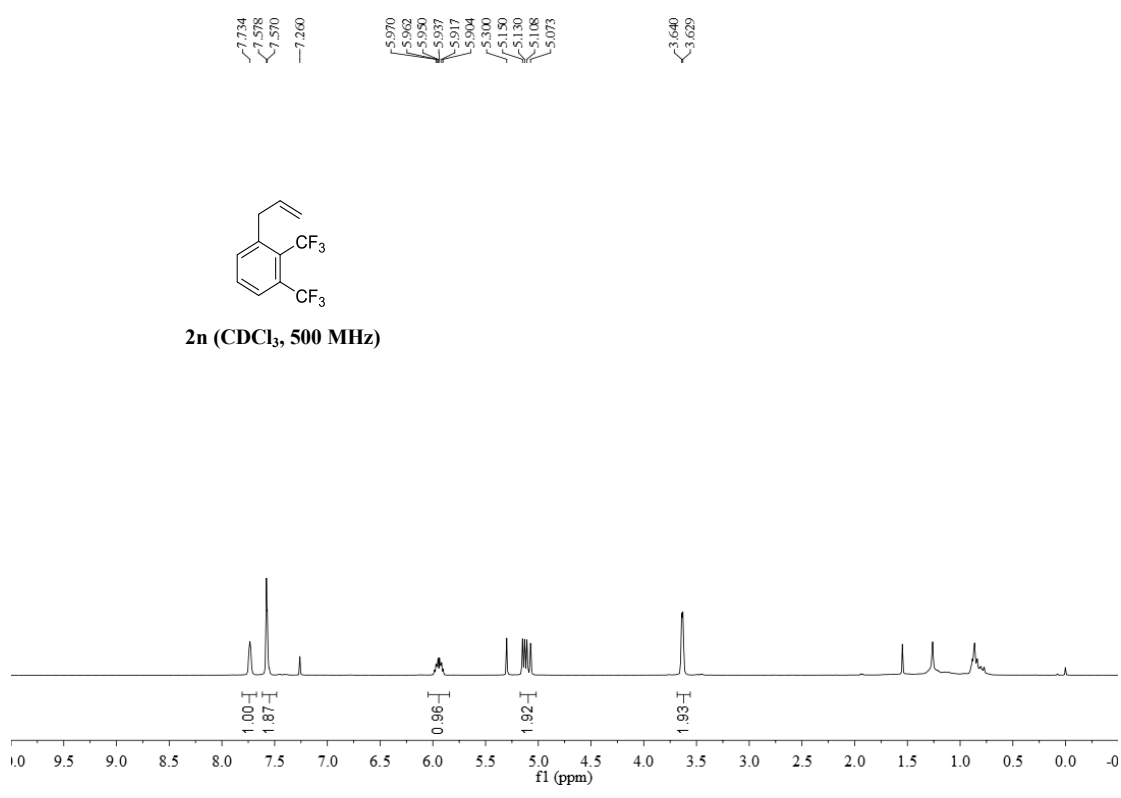

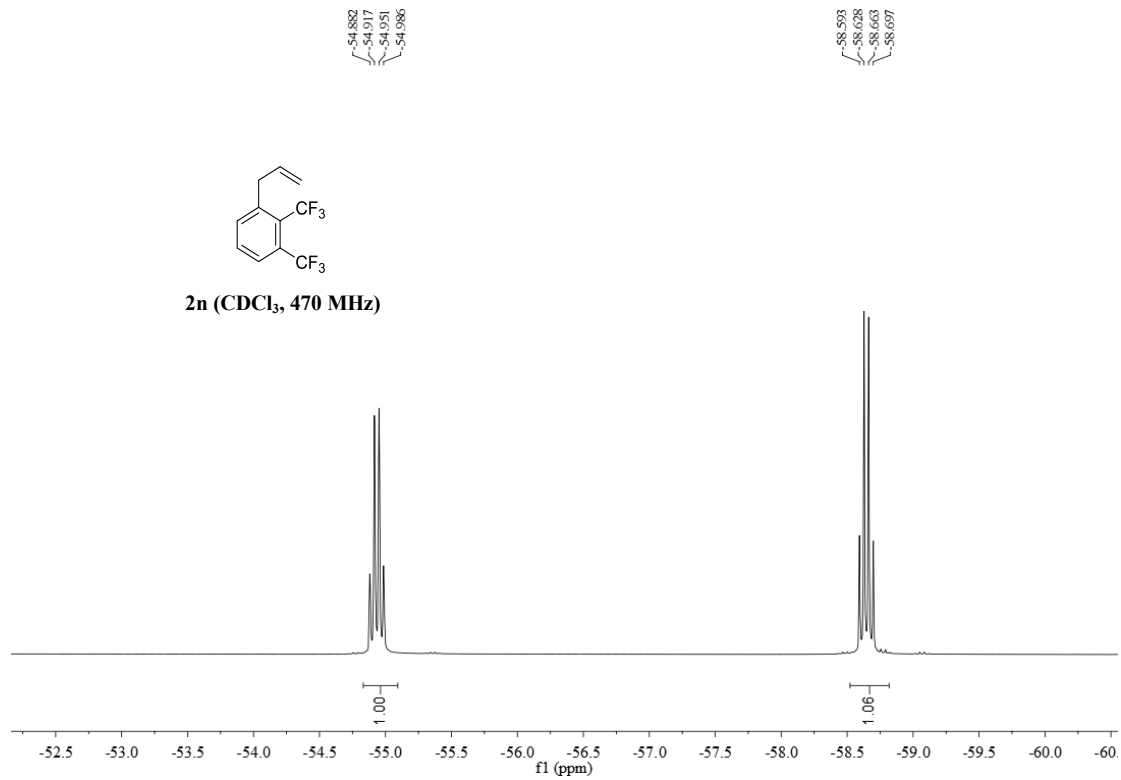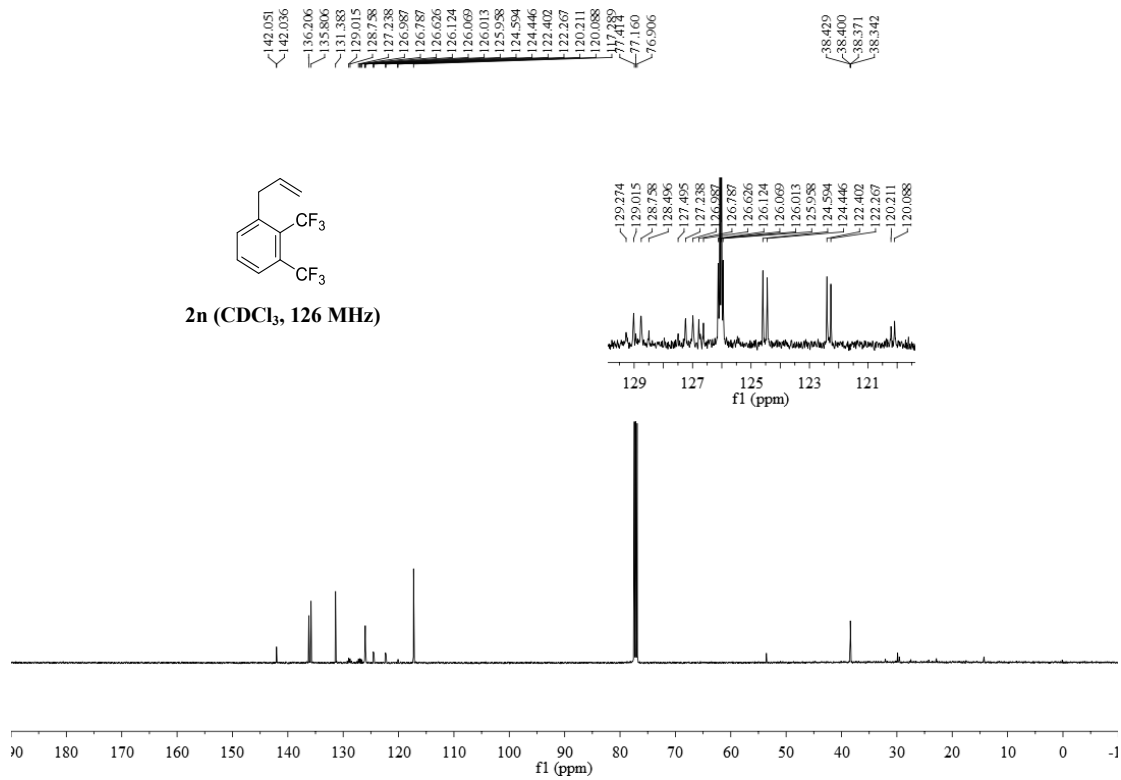

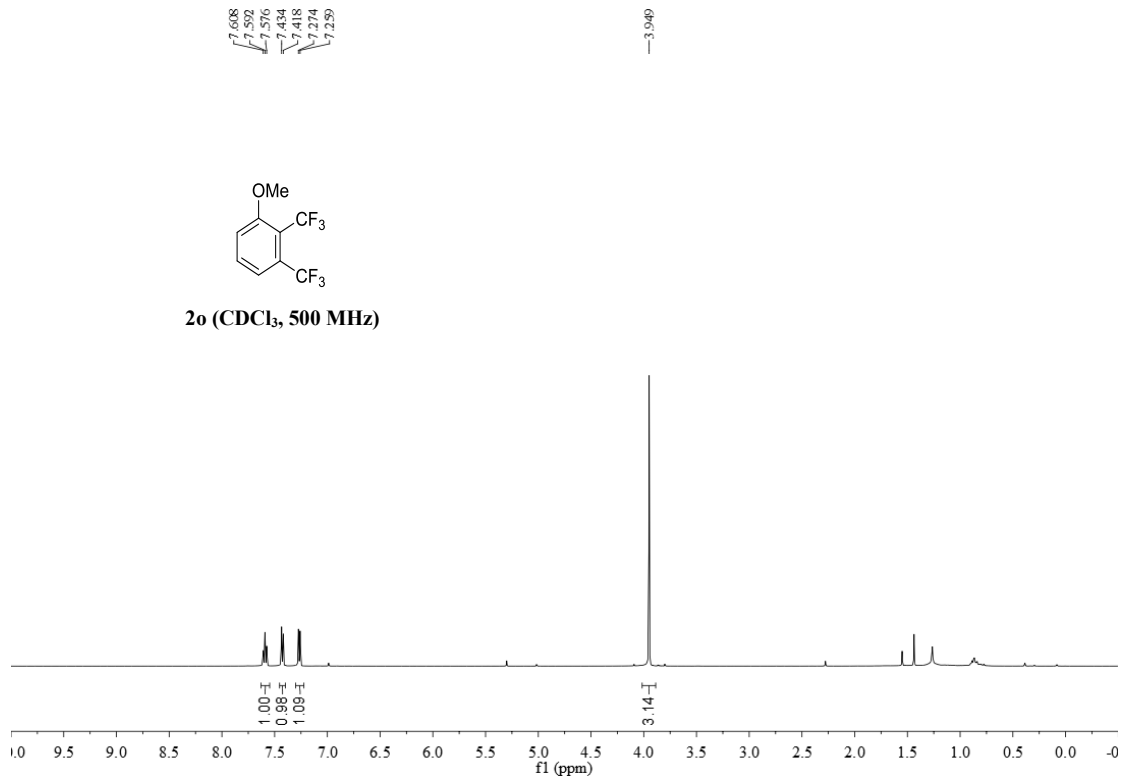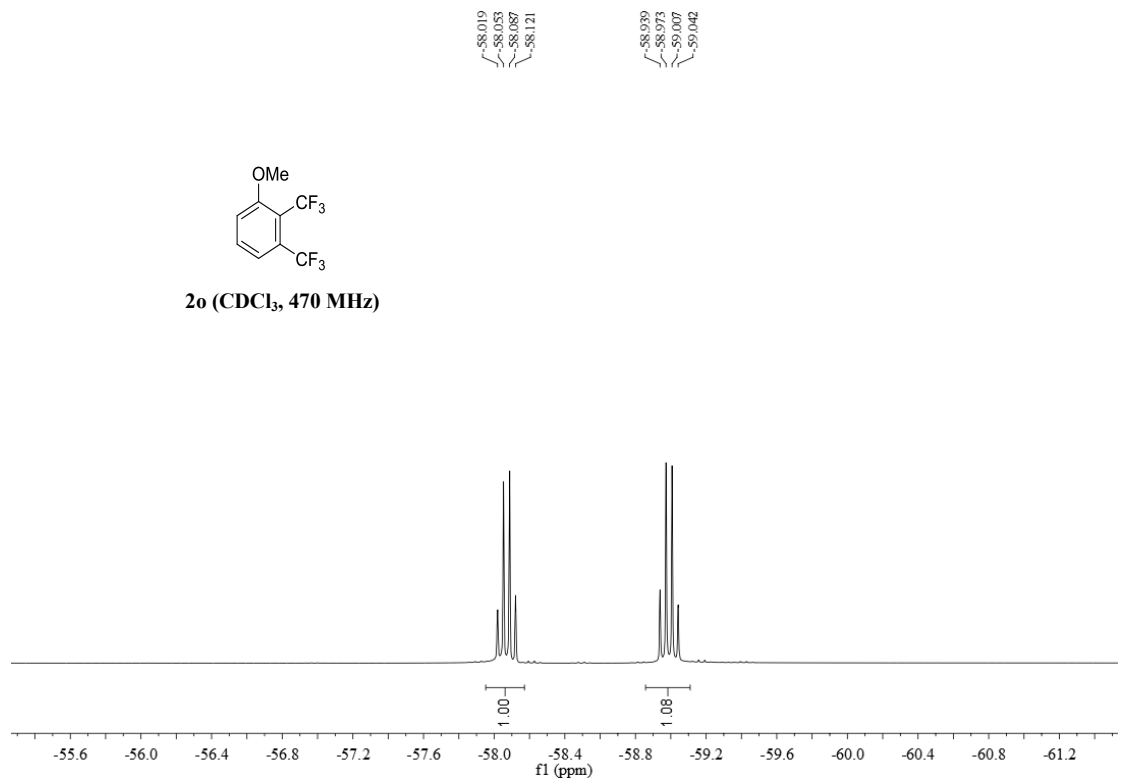

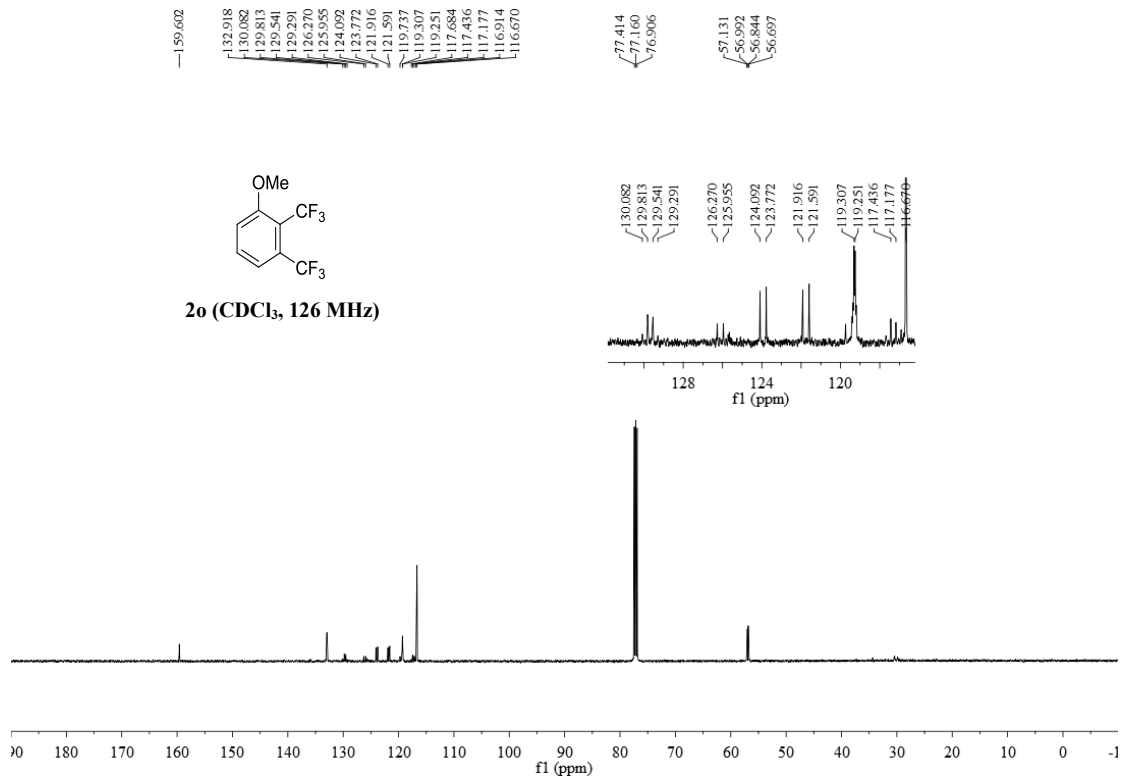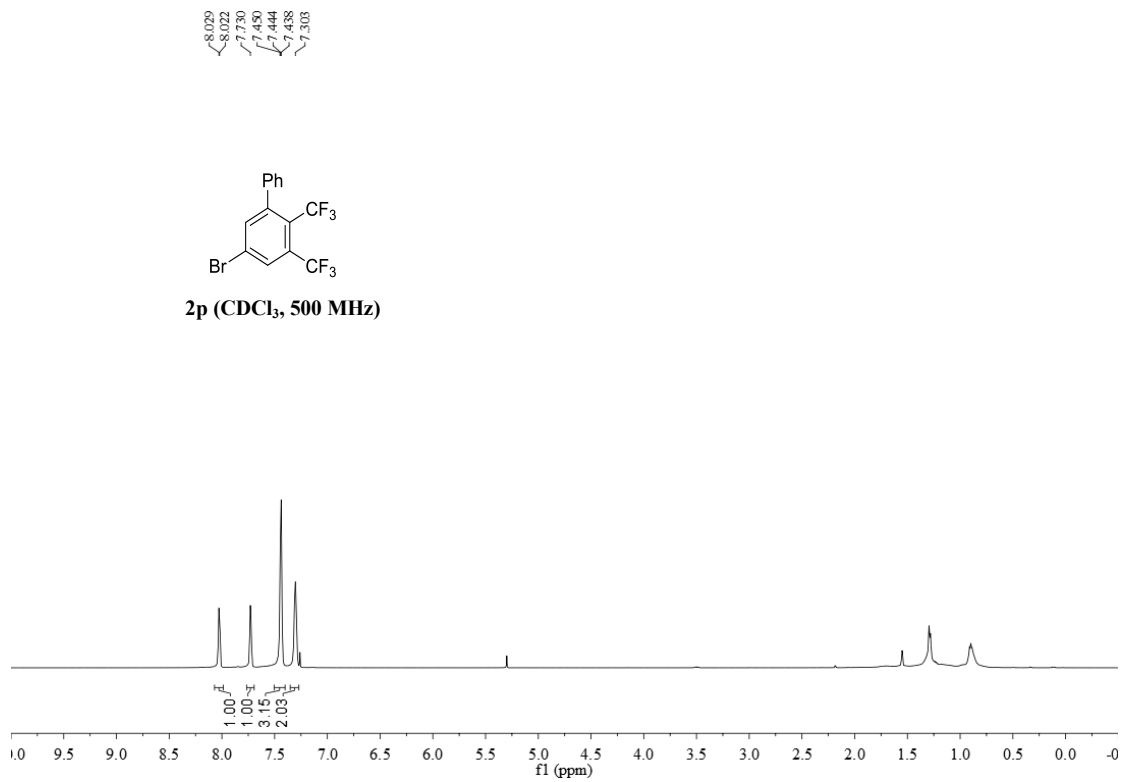

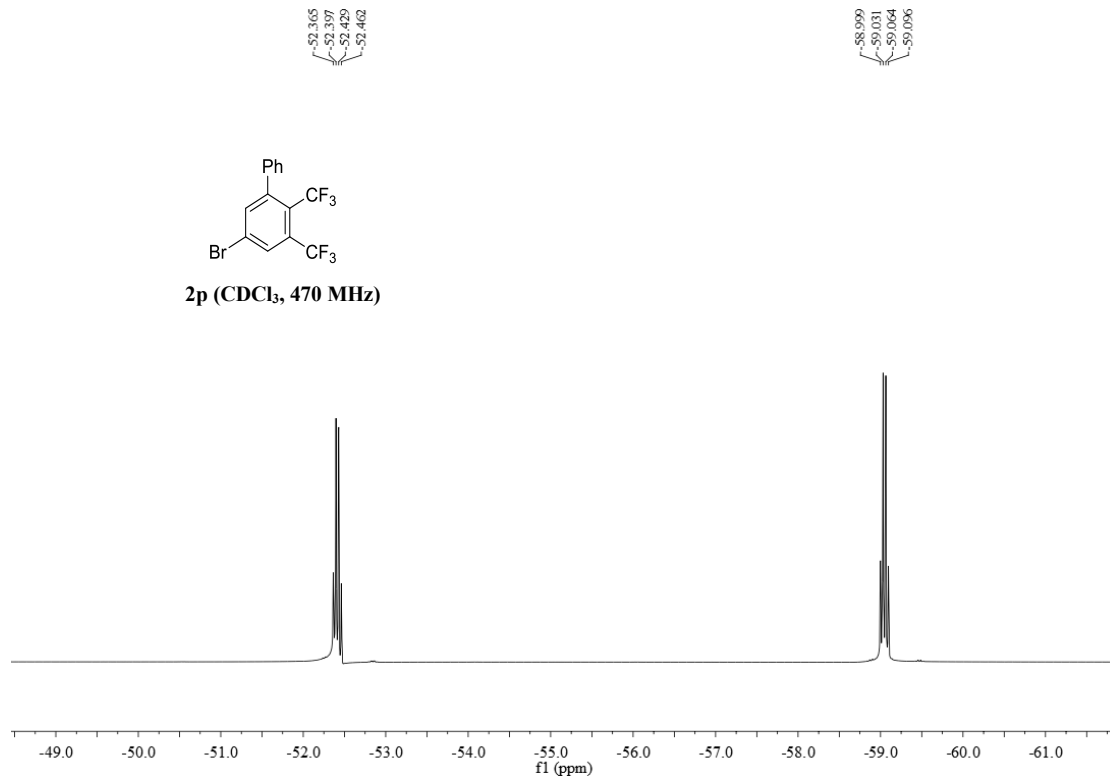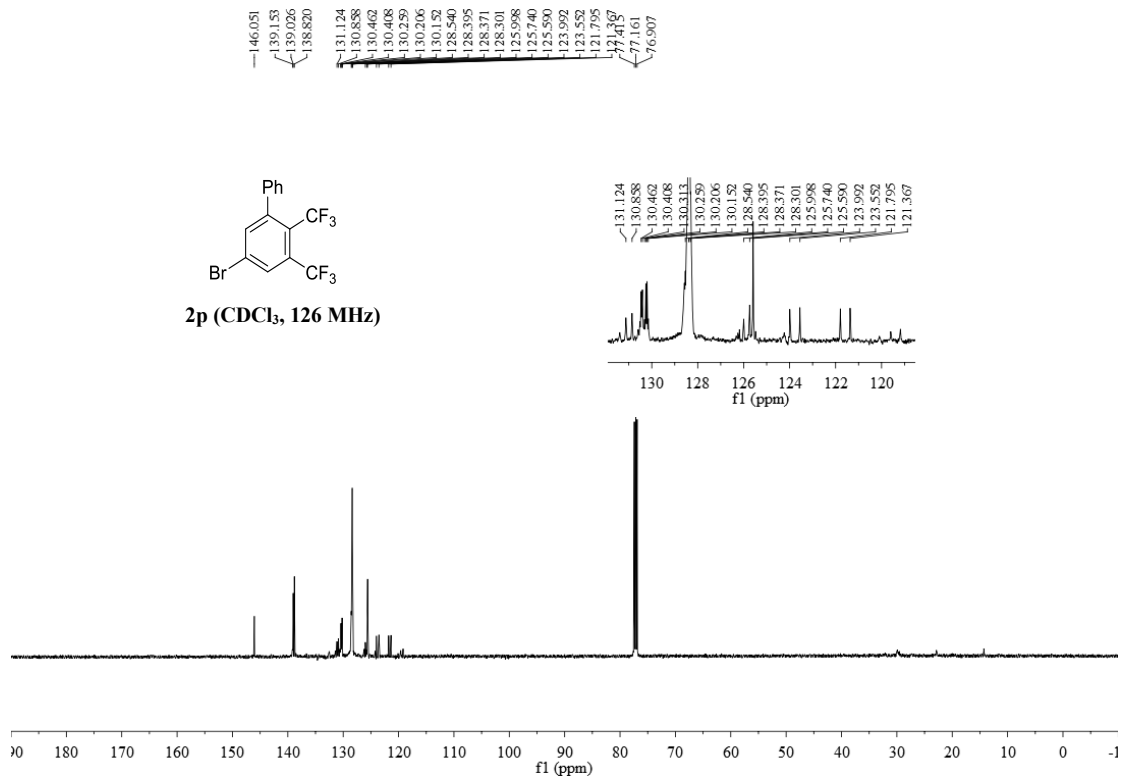

—8.005  
—7.267  
—4.016

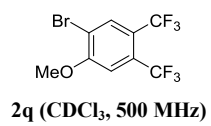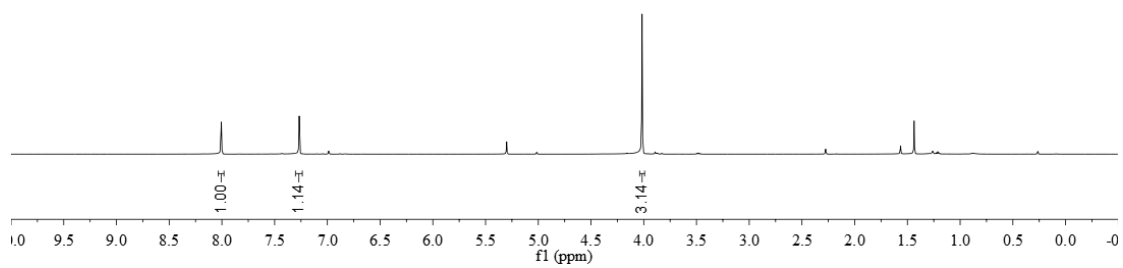

59.388  
59.384  
59.411  
59.437  
59.463  
60.364  
60.352  
60.405  
60.419  
60.430  
60.447  
60.457  
60.475

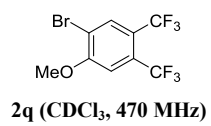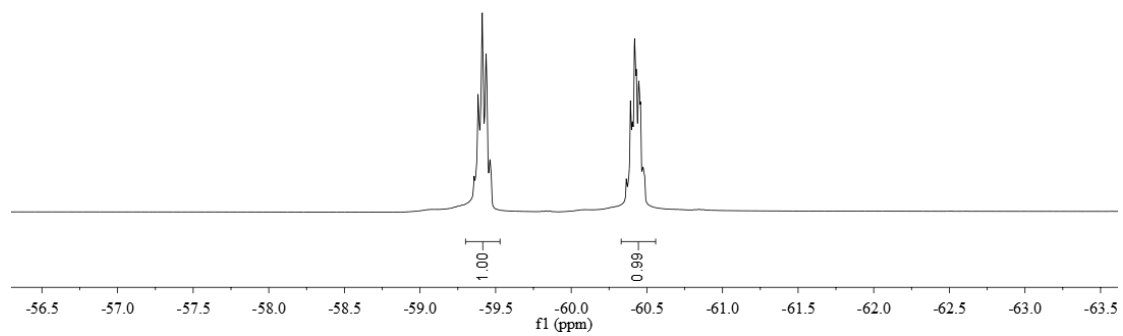

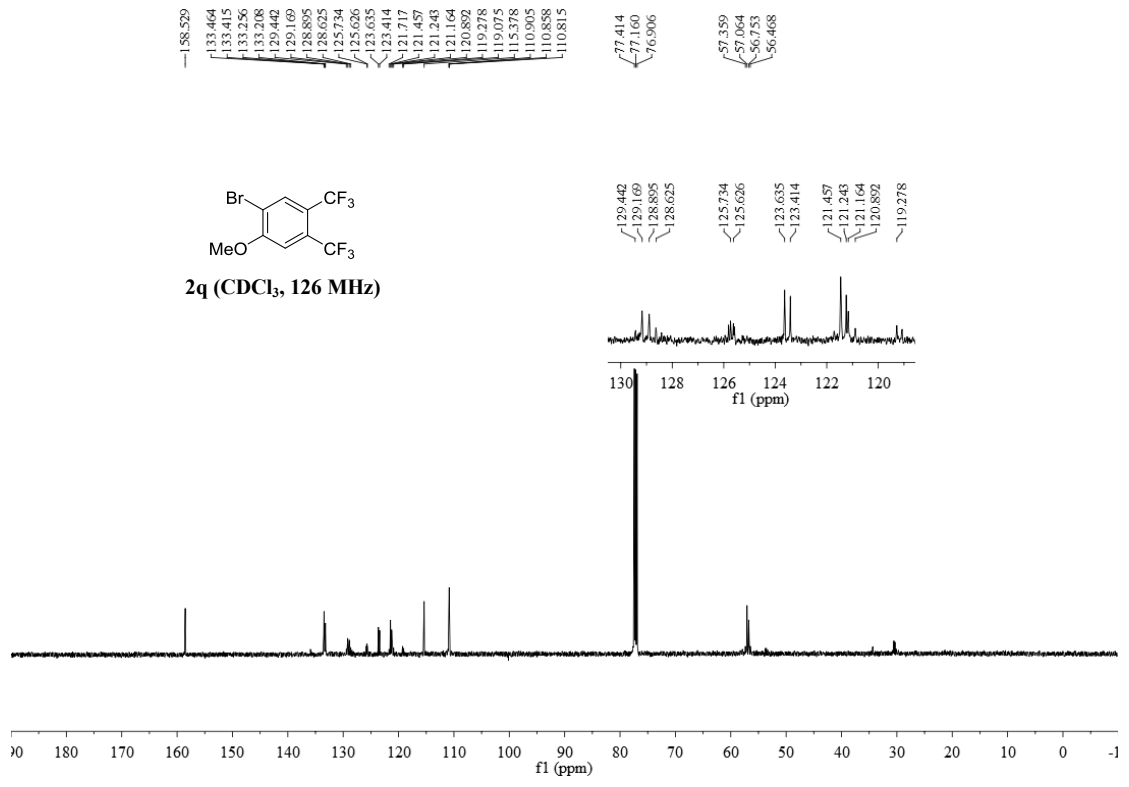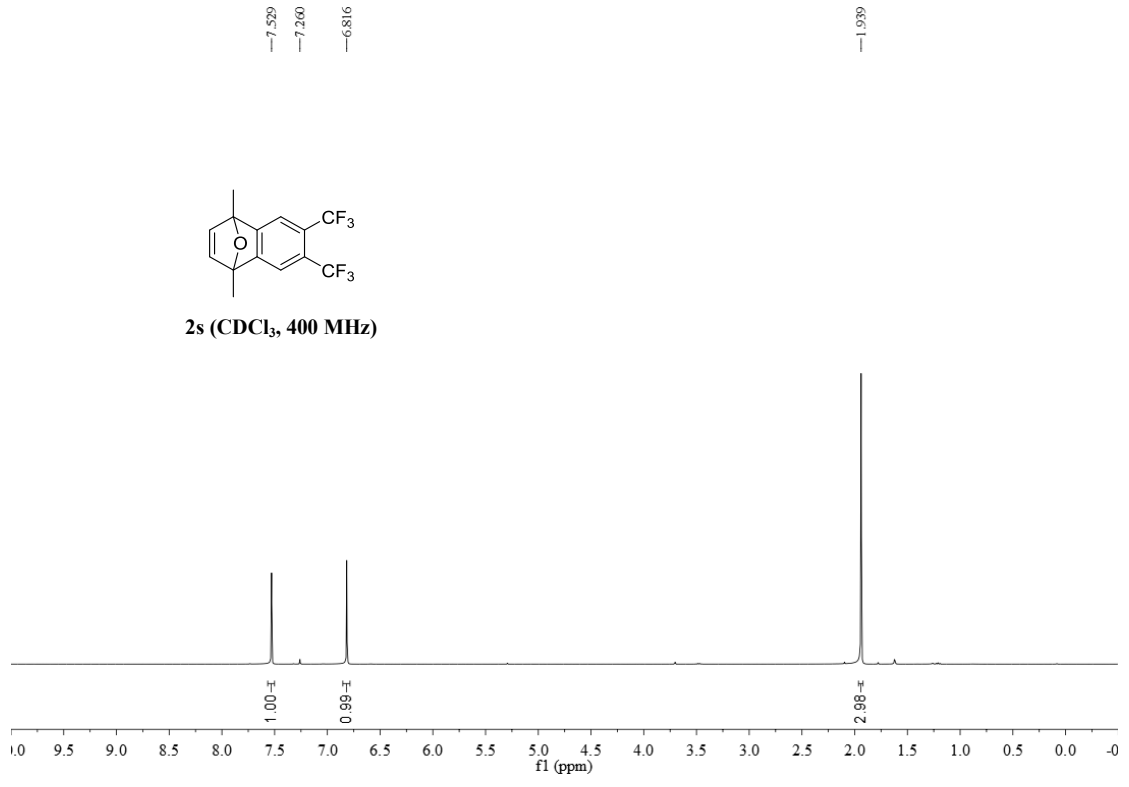

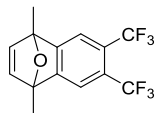

2s (CDCl<sub>3</sub>, 376 MHz)

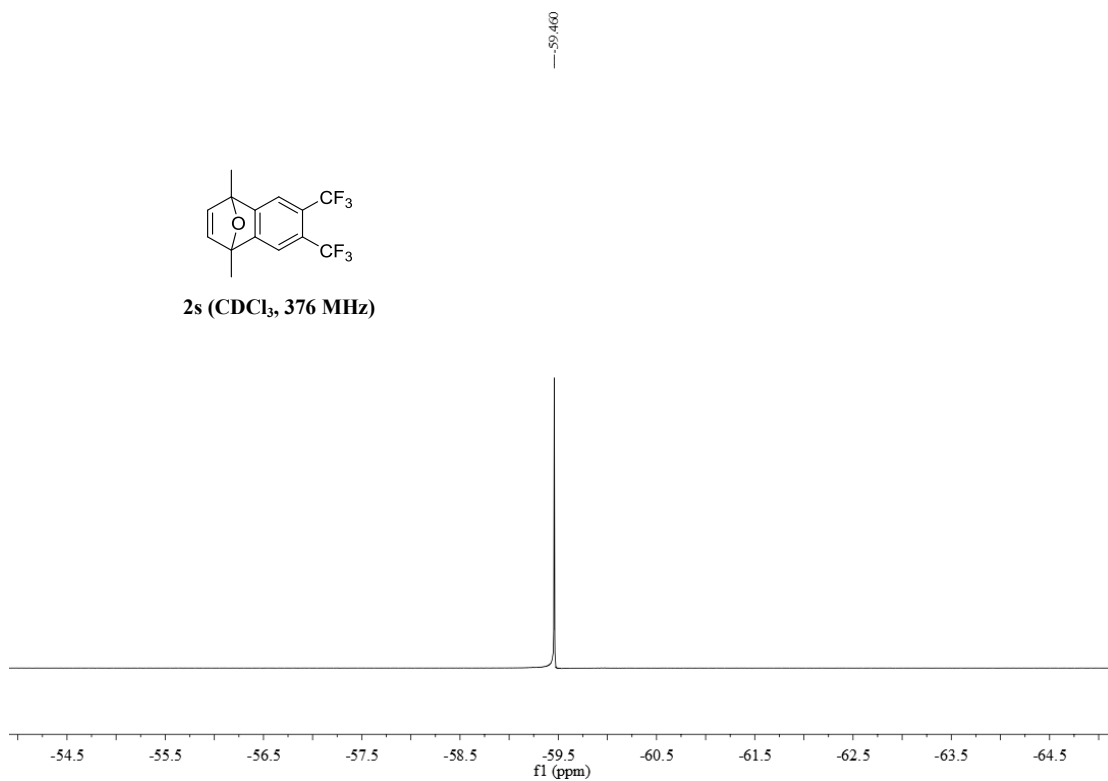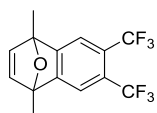

2s (CDCl<sub>3</sub>, 101 MHz)

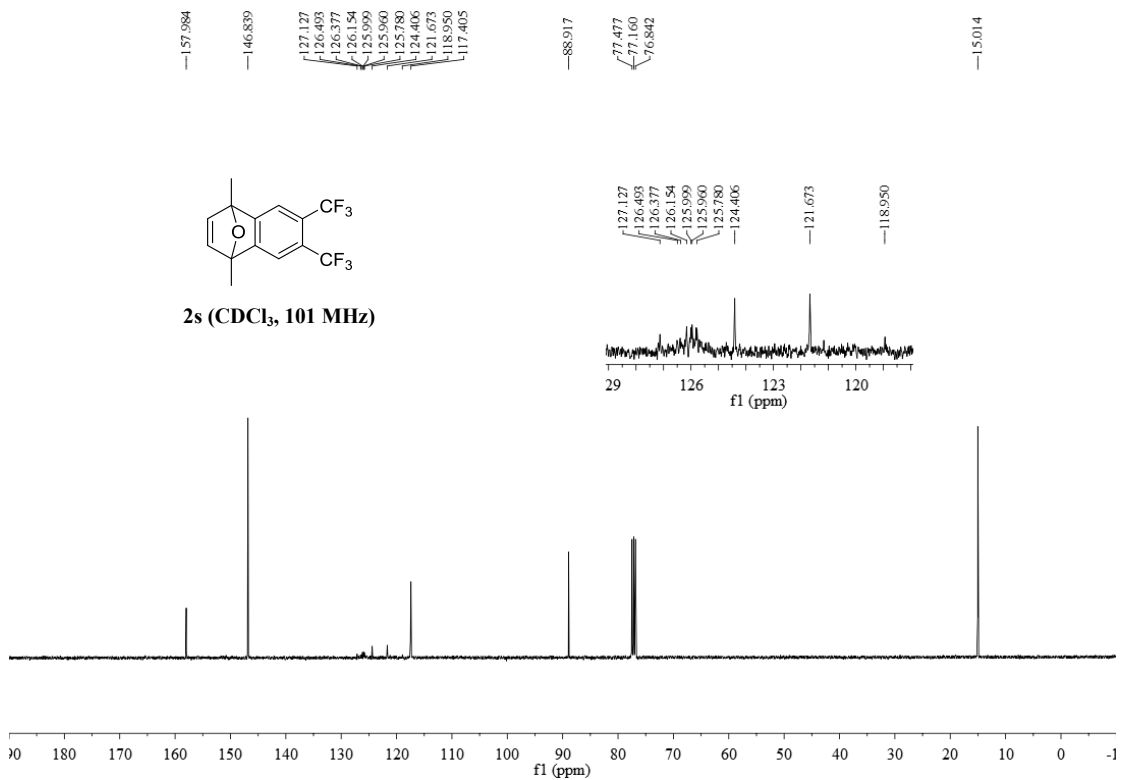



7.519  
7.260  
6.815

2.397  
2.387  
2.375  
2.368  
2.357  
2.347  
2.336  
2.279  
2.268  
2.259  
2.247  
2.241  
2.229  
2.218  
1.609  
1.517  
1.503  
1.488  
0.996  
0.981

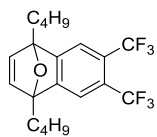

2t (CDCl<sub>3</sub>, 500 MHz)

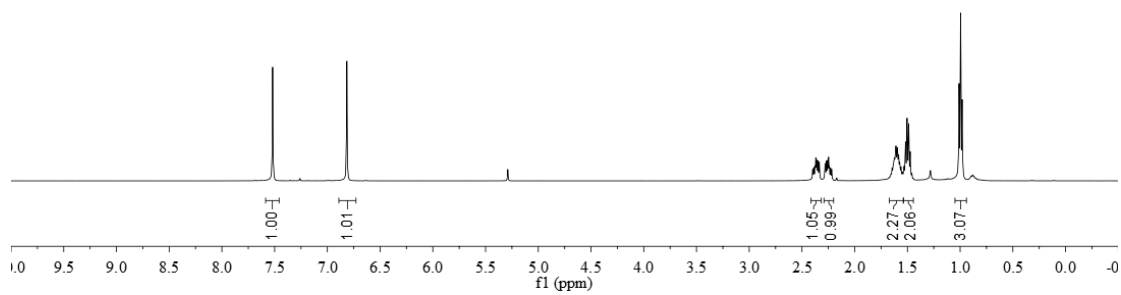

-59.425

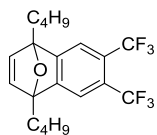

2t (CDCl<sub>3</sub>, 470 MHz)

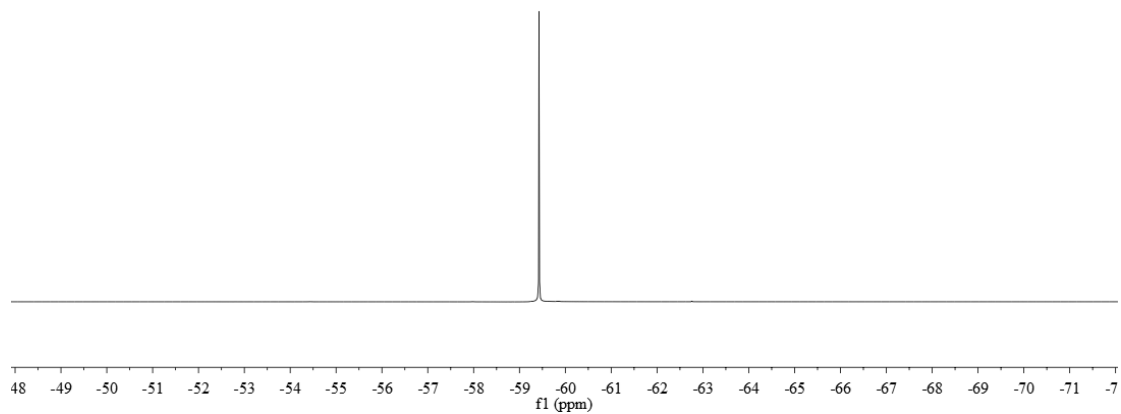

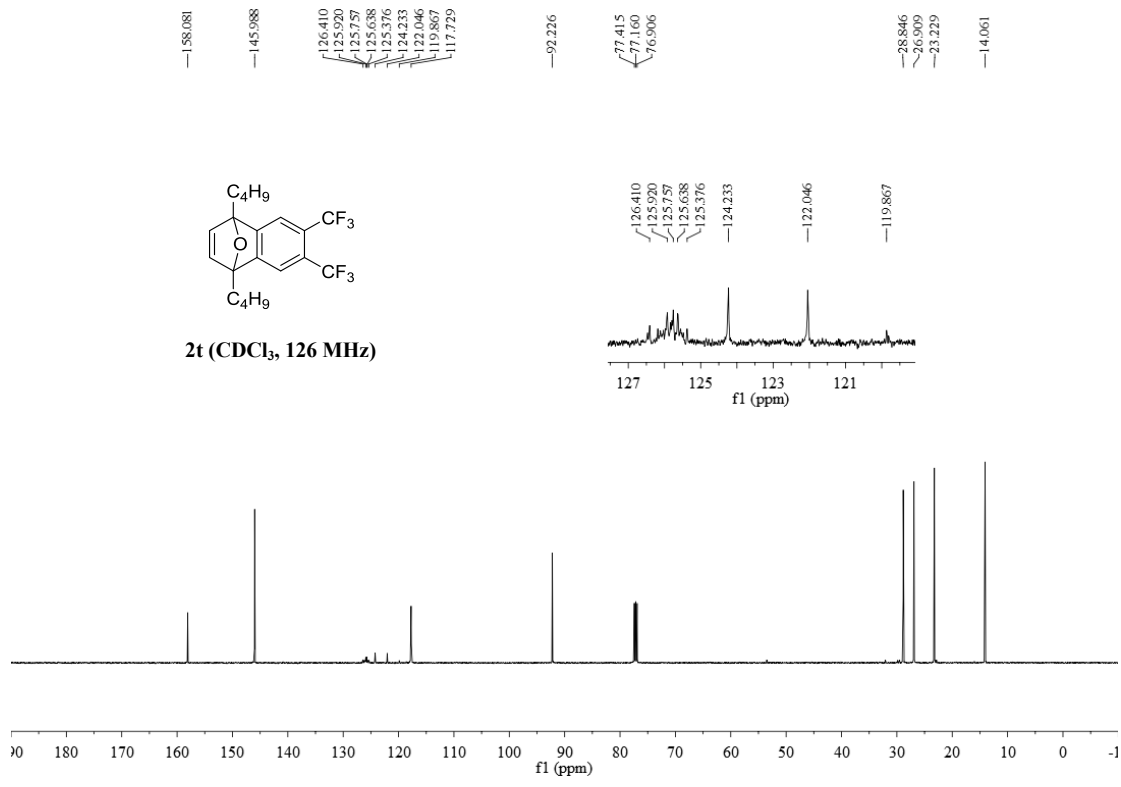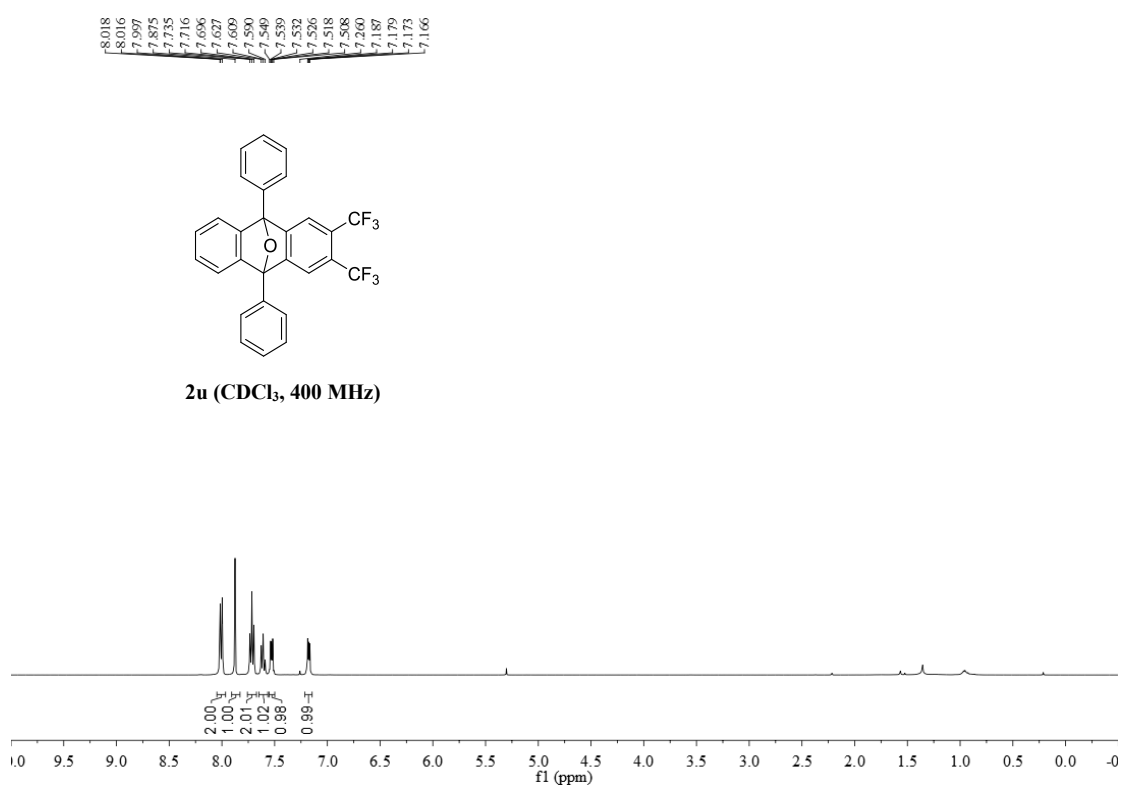

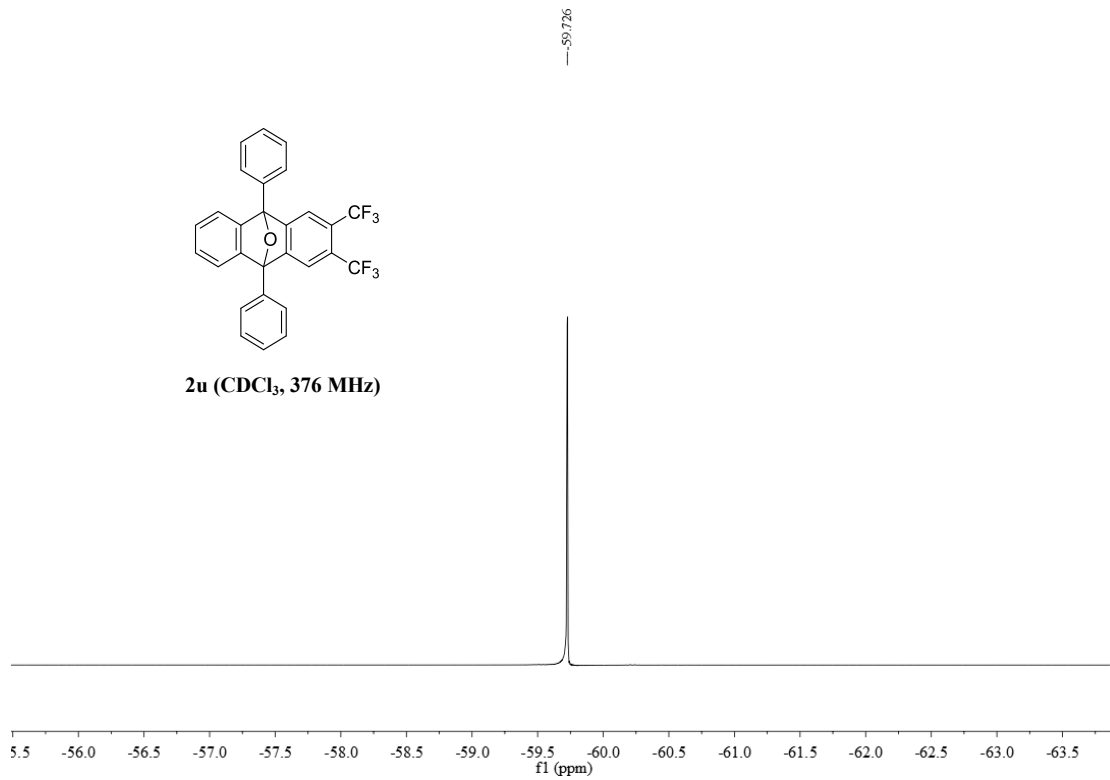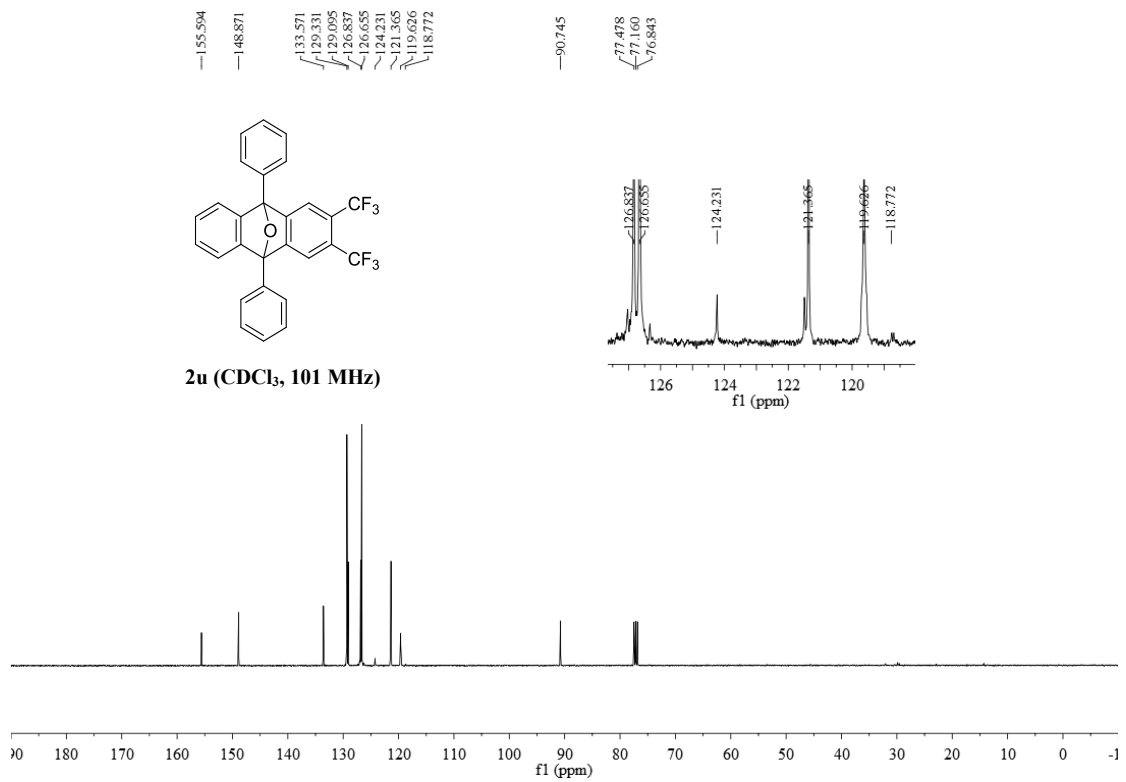

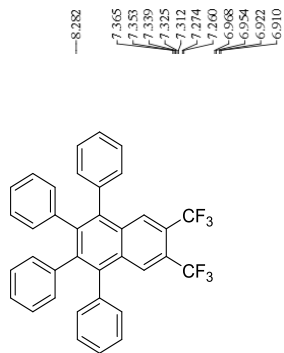

2v (CDCl<sub>3</sub>, 500 MHz)

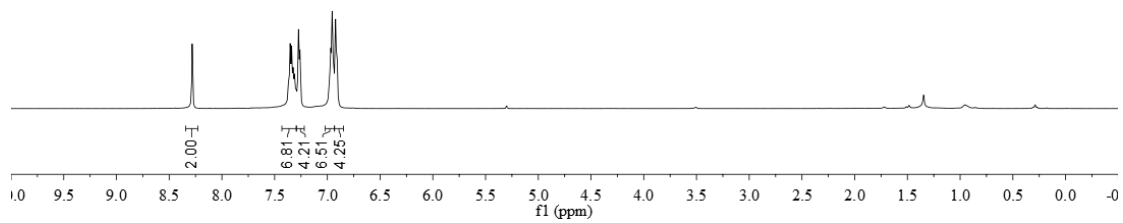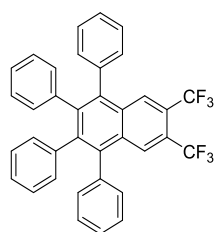

2v (CDCl<sub>3</sub>, 470 MHz)

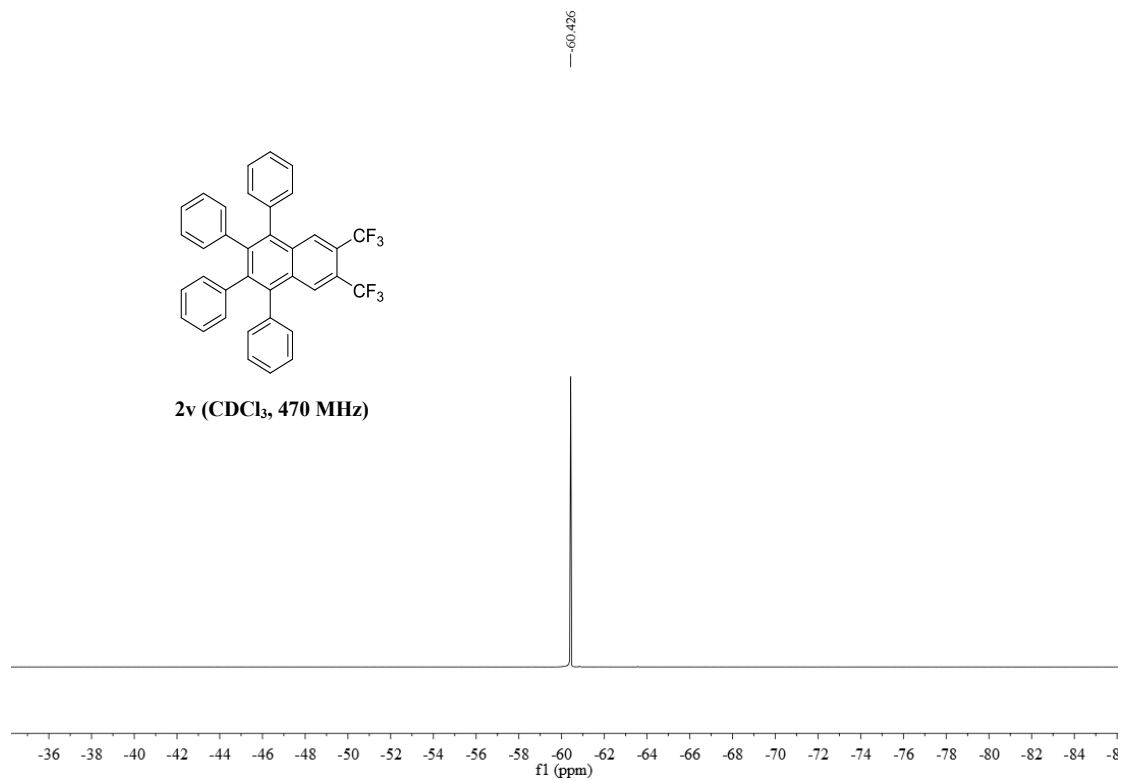

142.820  
139.744  
139.569  
137.804  
132.125  
131.023  
131.131  
128.543  
128.121  
127.472  
127.025  
126.591  
126.118  
124.423  
124.114  
123.859  
123.768  
123.735  
123.571  
123.545  
123.307  
122.239  
120.057

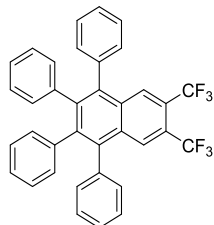

**2v (CDCl<sub>3</sub>, 126 MHz)**

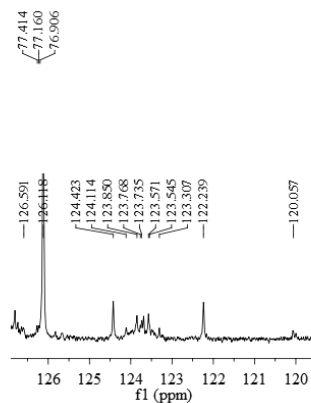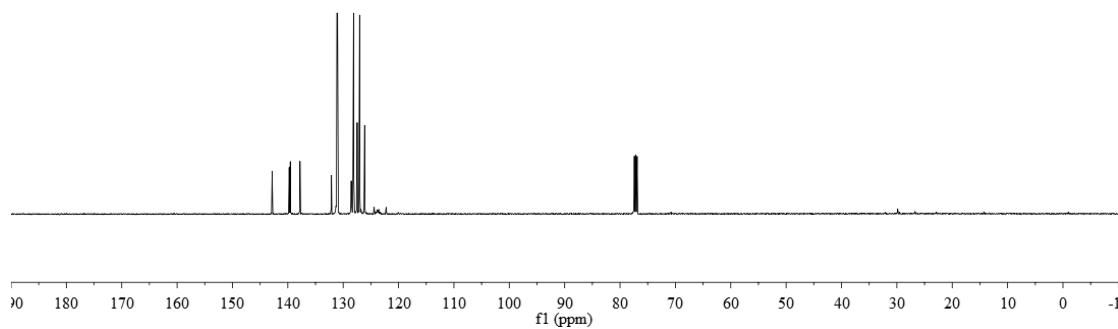

7.727  
7.515  
7.260  
3.984  
3.977  
3.957  
3.946  
3.935  
3.925  
3.914  
3.903  
3.895  
3.944  
2.926  
2.352  
2.387  
2.378  
2.366  
2.360  
2.314  
2.068  
2.062  
2.039  
2.016  
2.012  
1.997  
1.988  
1.984  
1.976  
1.968  
1.964  
1.890  
1.878  
1.871  
1.859  
1.842  
1.832  
1.824  
1.809  
1.801  
1.782  
1.776  
1.691  
1.668  
1.654  
1.646  
1.632  
1.602  
1.596  
1.583  
1.576  
1.571  
1.564  
1.538  
1.531  
1.513  
1.505  
1.450  
1.430  
1.411  
1.402  
1.389  
1.378  
1.366  
1.354  
1.342  
0.888

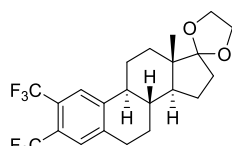

**2w (CDCl<sub>3</sub>, 500 MHz)**

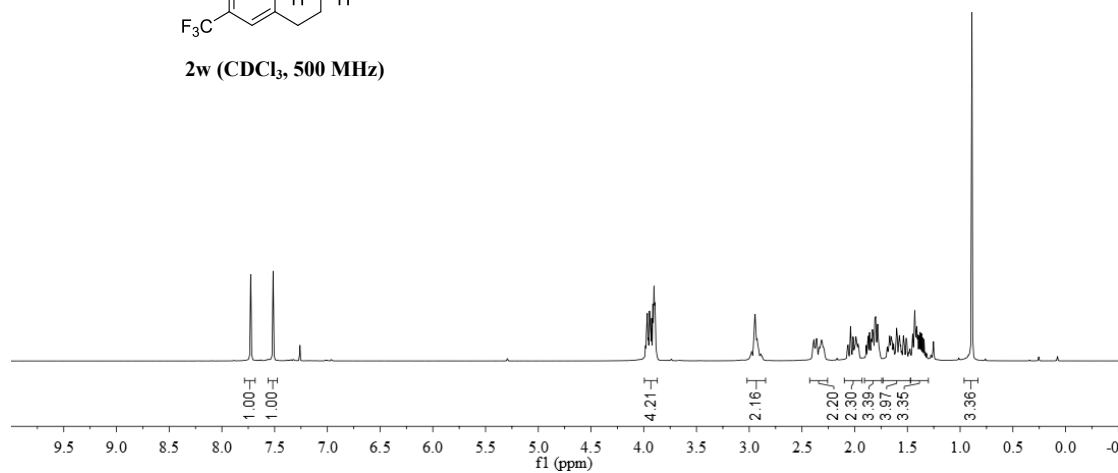

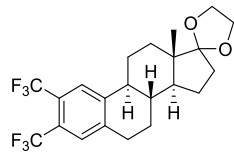

2w (CDCl<sub>3</sub>, 470 MHz)

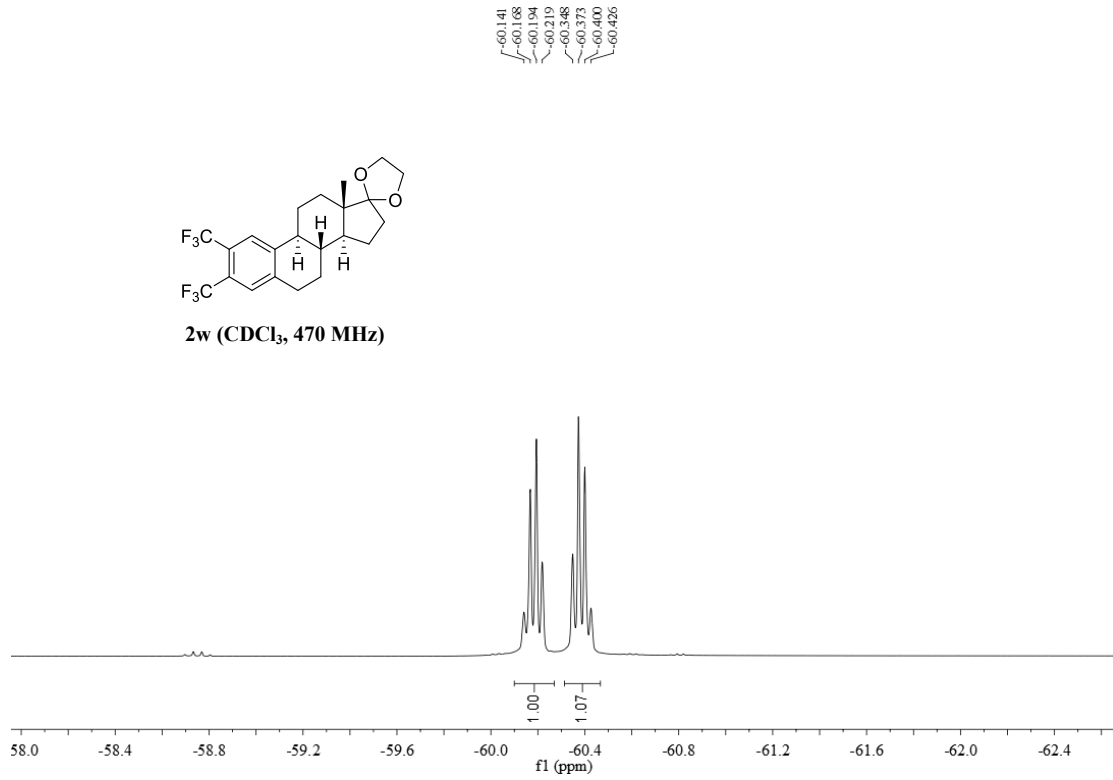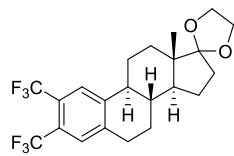

2w (CDCl<sub>3</sub>, 126 MHz)

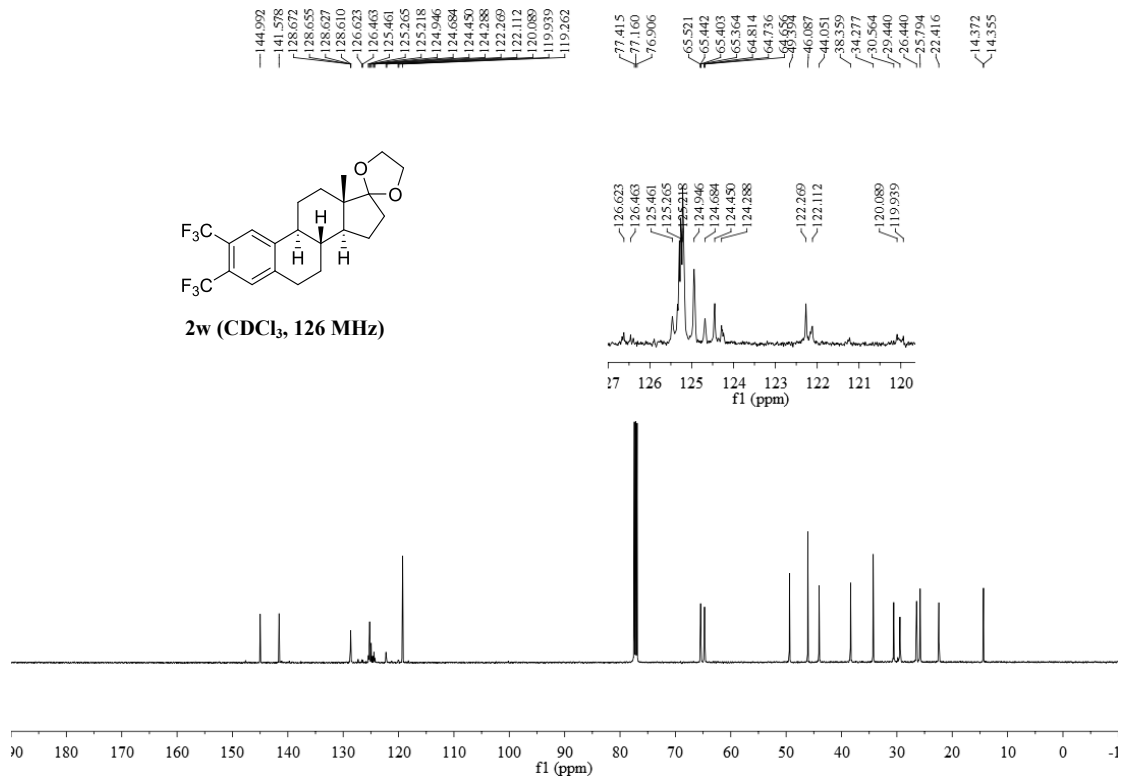

8.226  
8.013  
8.006  
8.001  
7.994  
7.882  
7.863  
7.693  
7.686  
7.679  
7.673  
7.667  
7.656  
7.621  
7.606  
7.490  
7.475  
7.460

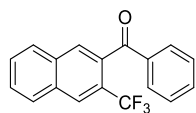

4 (CDCl<sub>3</sub>, 500 MHz)

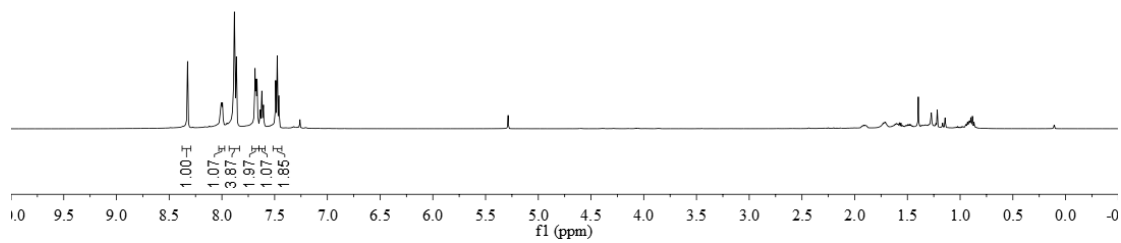

-58.520

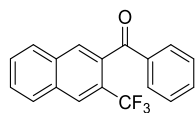

4 (CDCl<sub>3</sub>, 470 MHz)

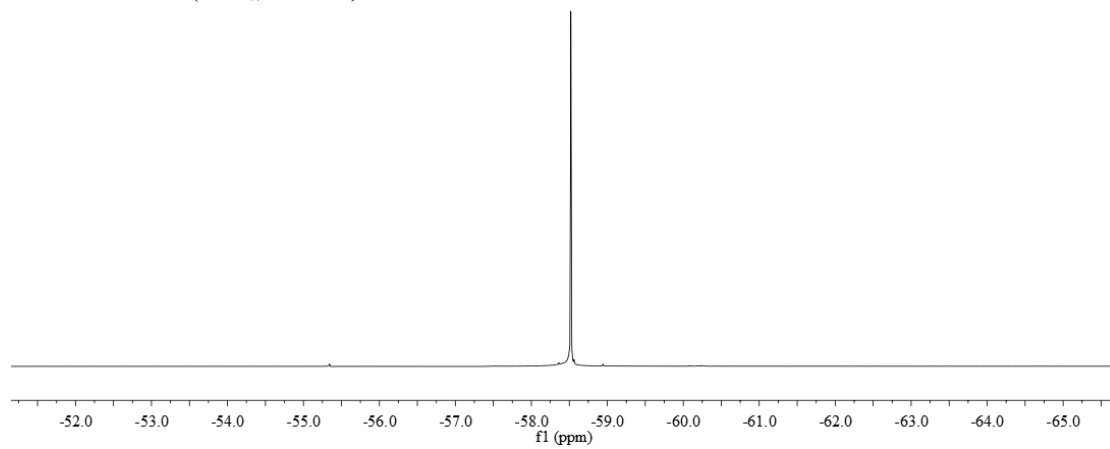

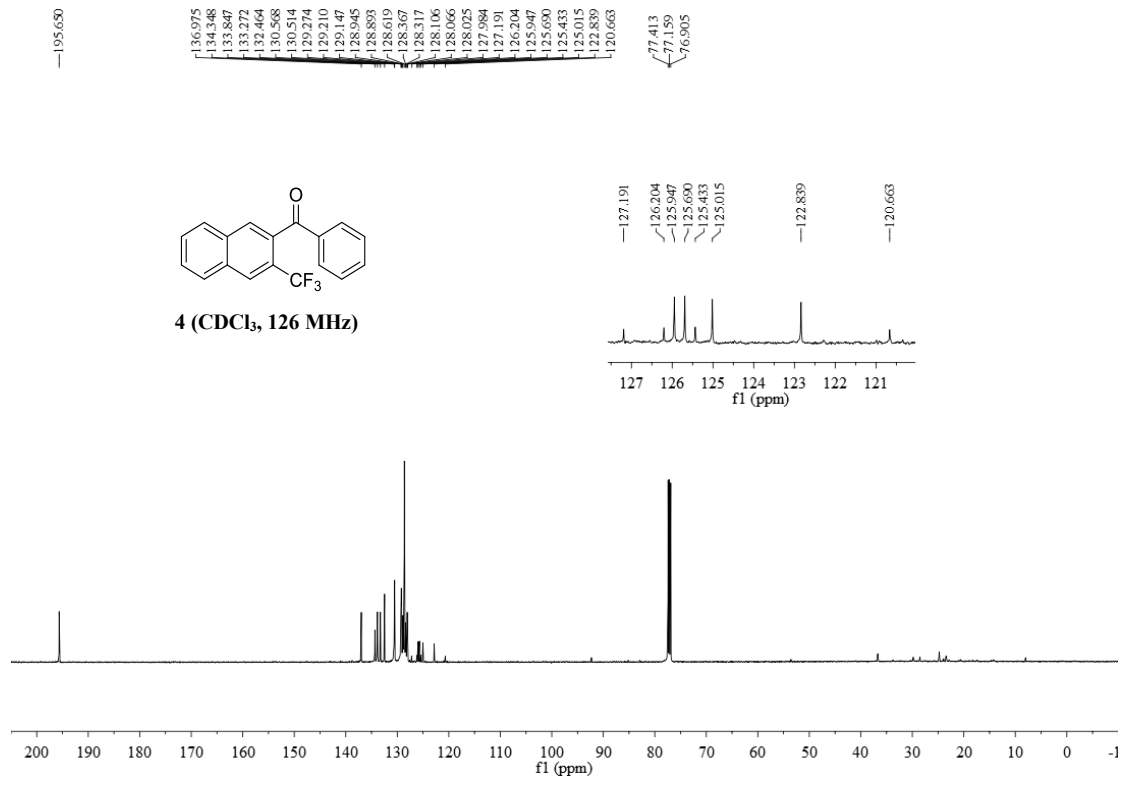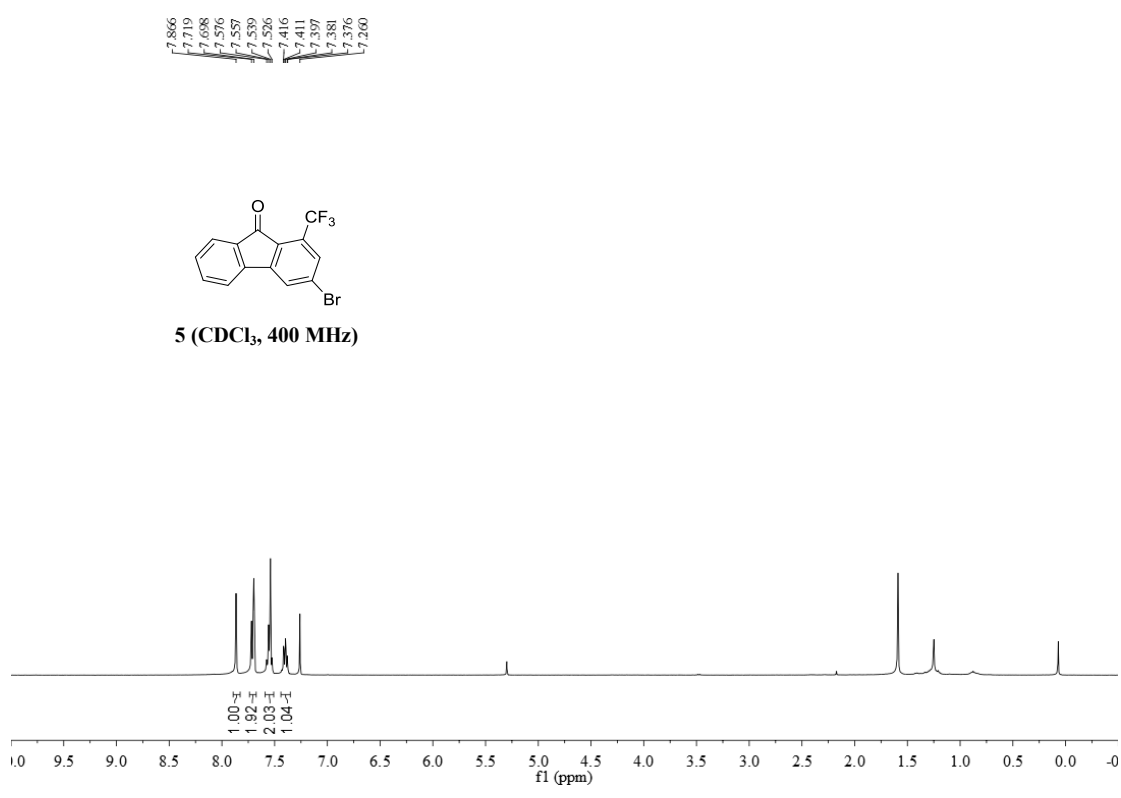



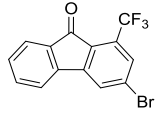

5 (CDCl<sub>3</sub>, 376 MHz)

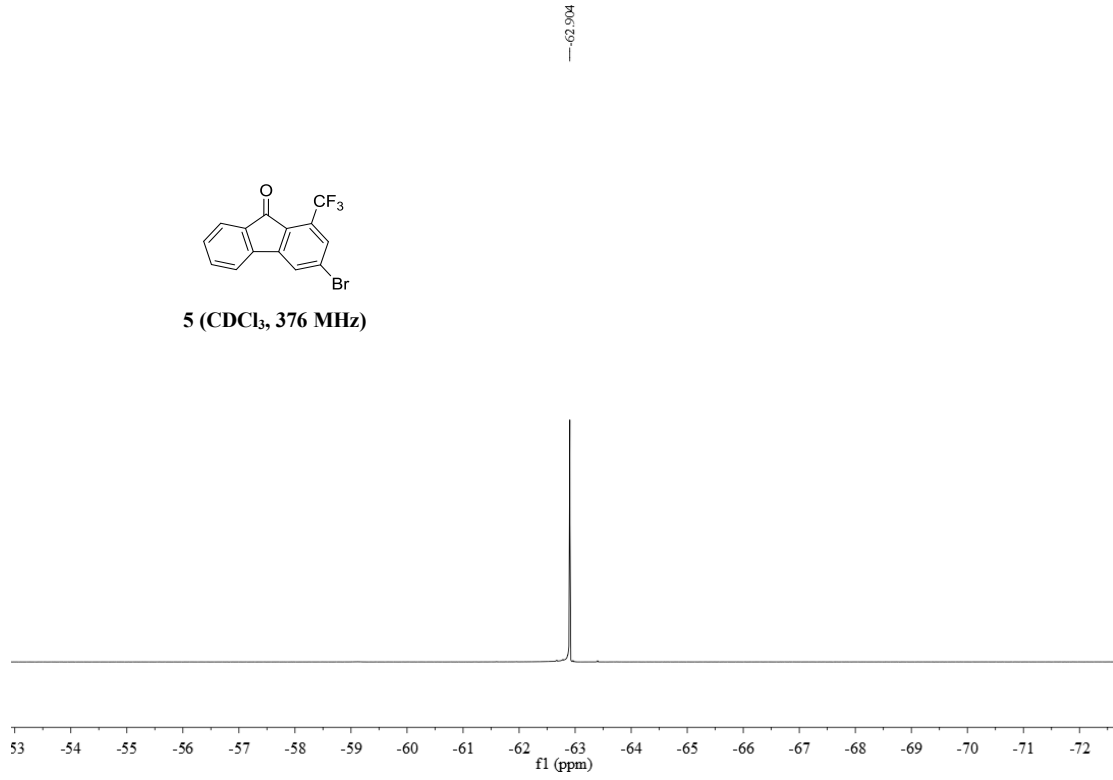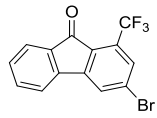

5 (CDCl<sub>3</sub>, 101 MHz)

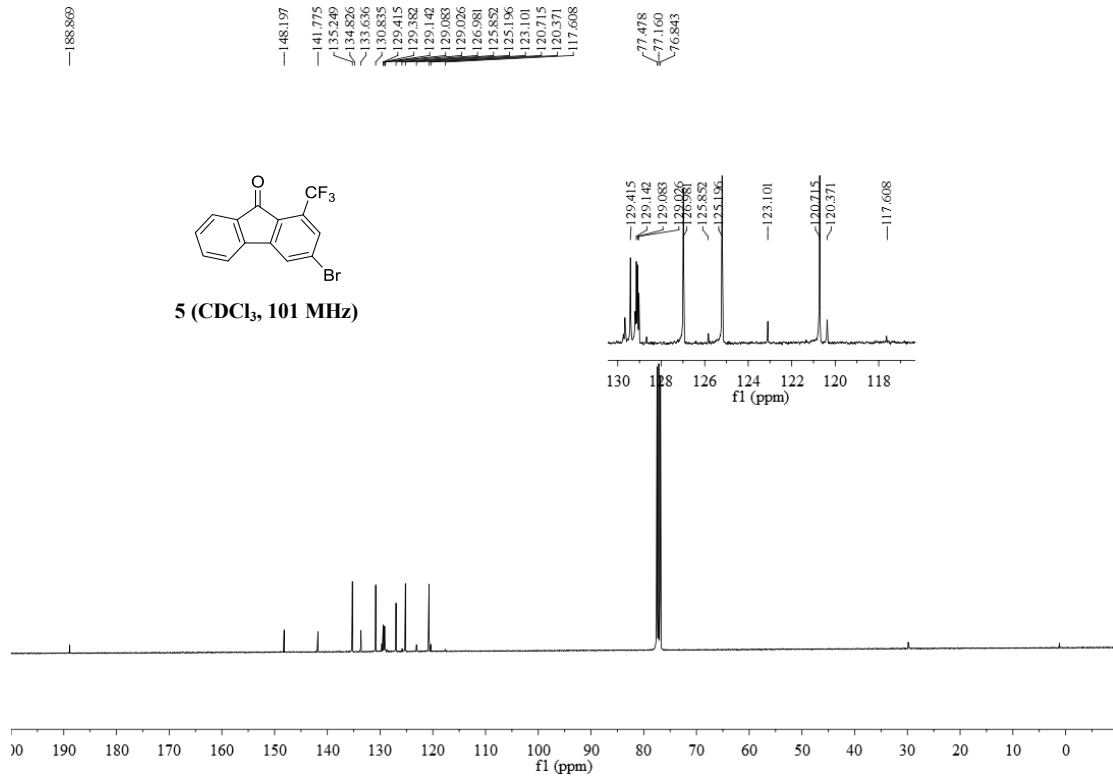

7.540  
7.532  
7.585  
7.579  
7.300  
7.387  
7.380  
7.294

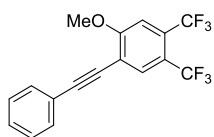

6 (CDCl<sub>3</sub>, 500 MHz)

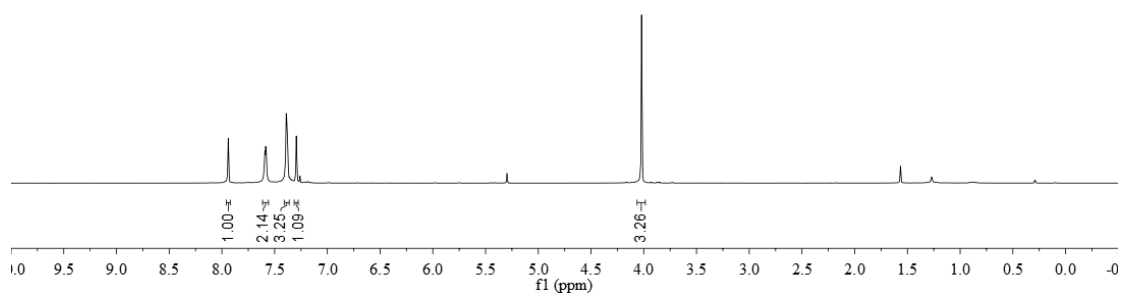

59.480  
59.507  
59.534  
59.561

60.429  
60.456  
60.483  
60.510

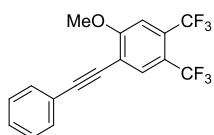

6 (CDCl<sub>3</sub>, 470 MHz)

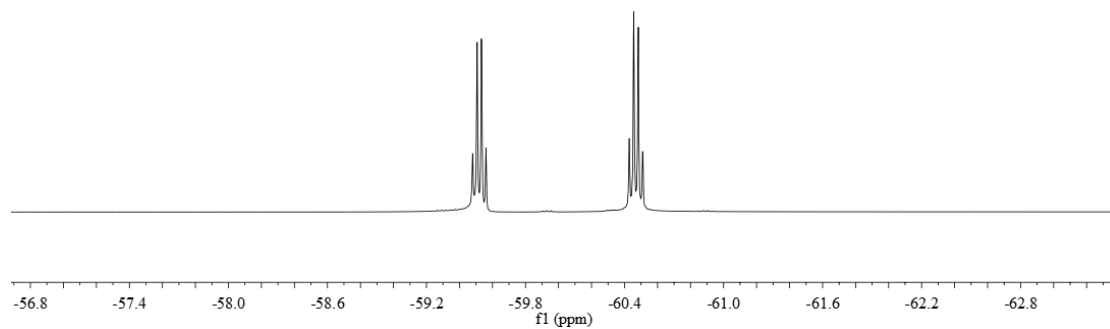

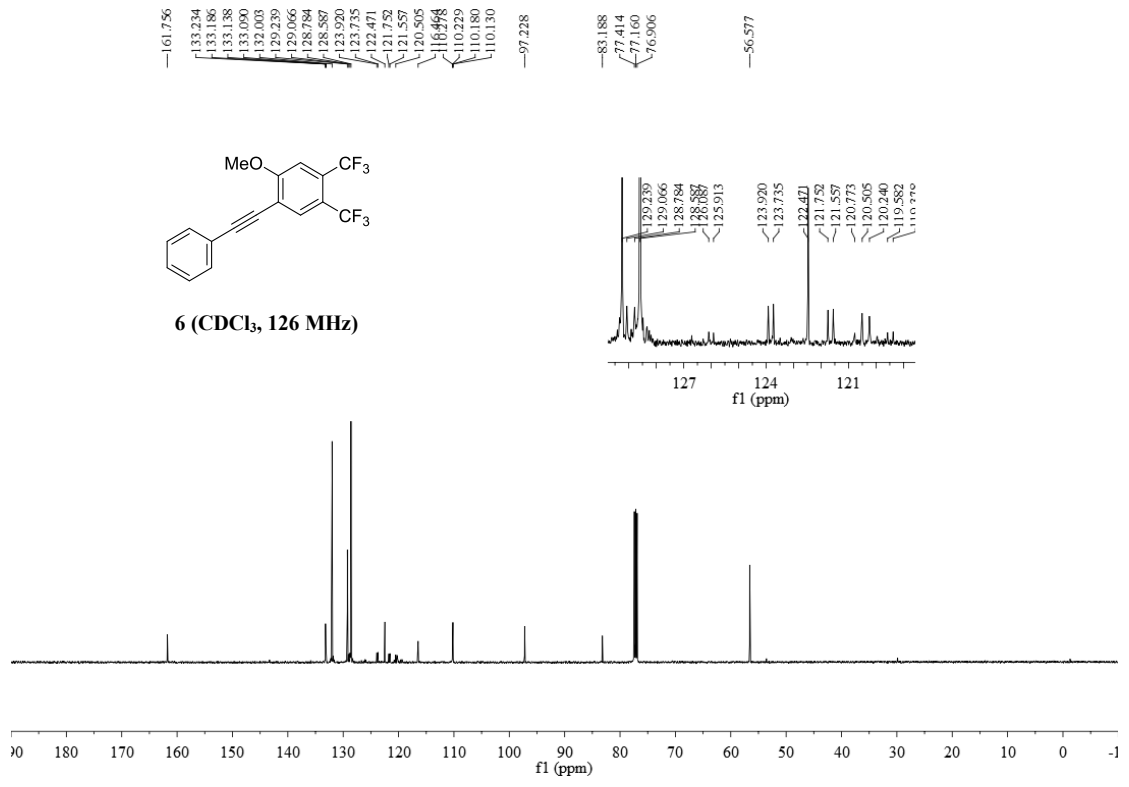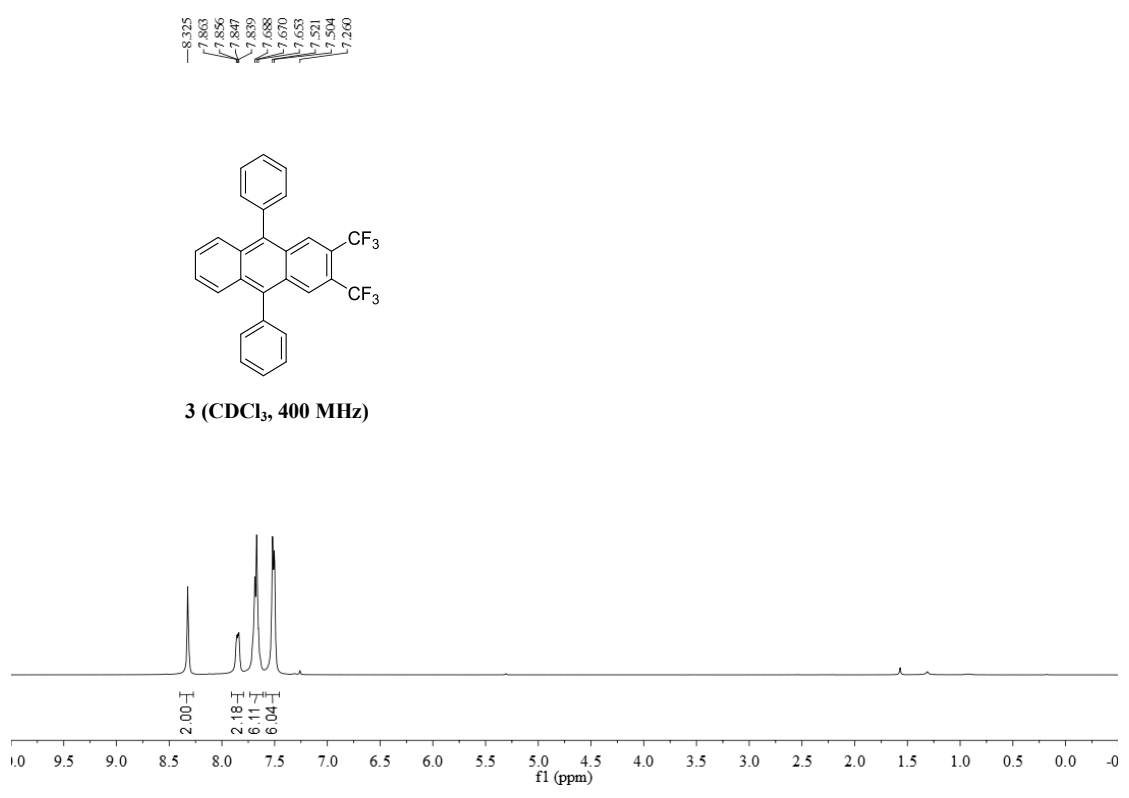

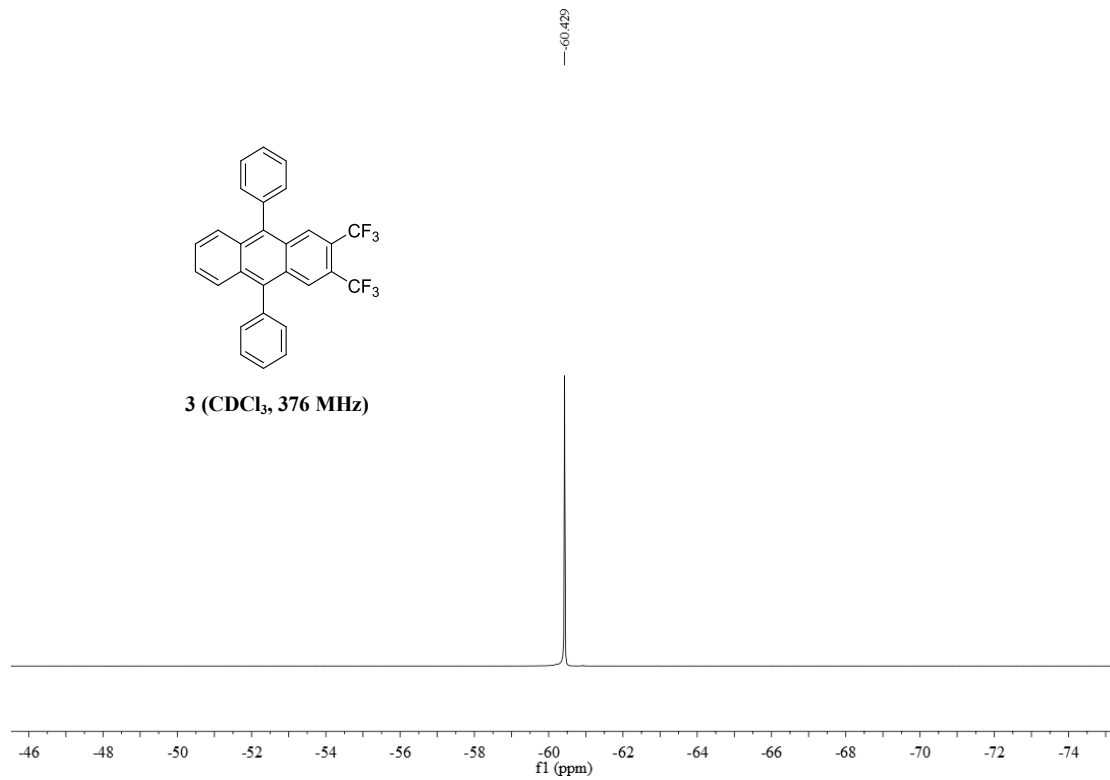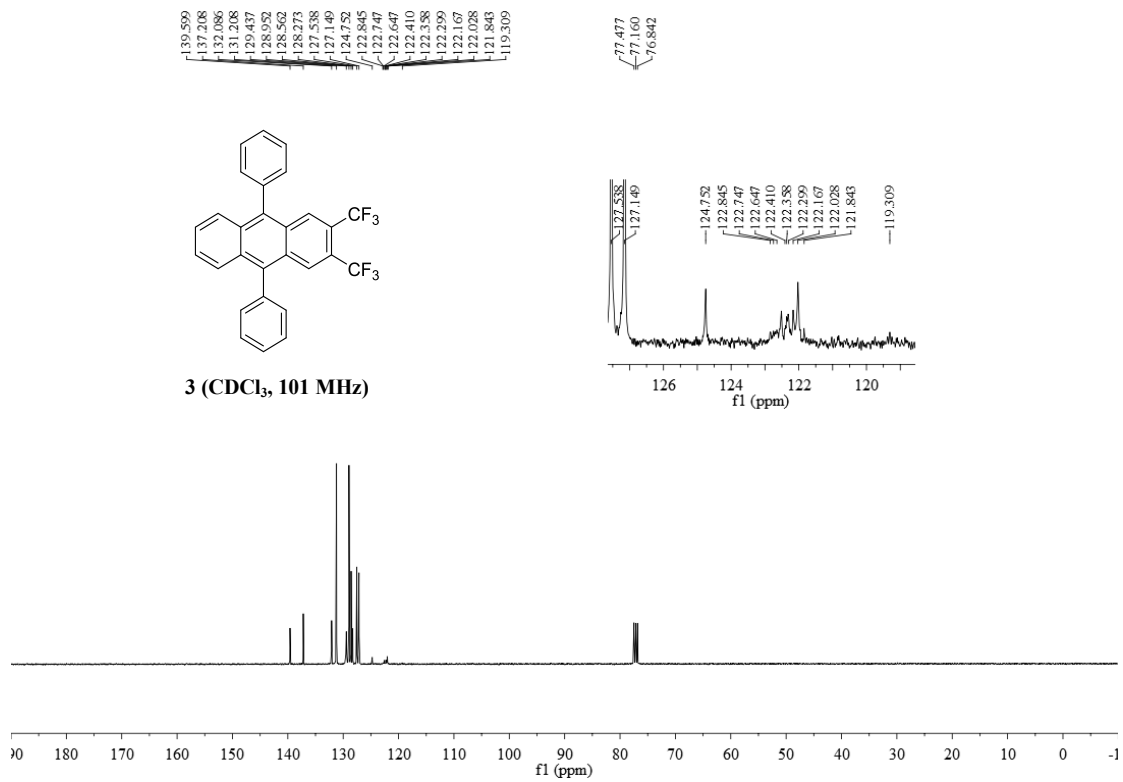

7.260  
7.140  
6.819  
6.803  
6.768  
6.733  
6.087  
6.002

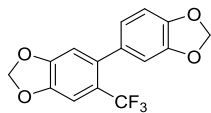

2d'' (CDCl<sub>3</sub>, 500 MHz)

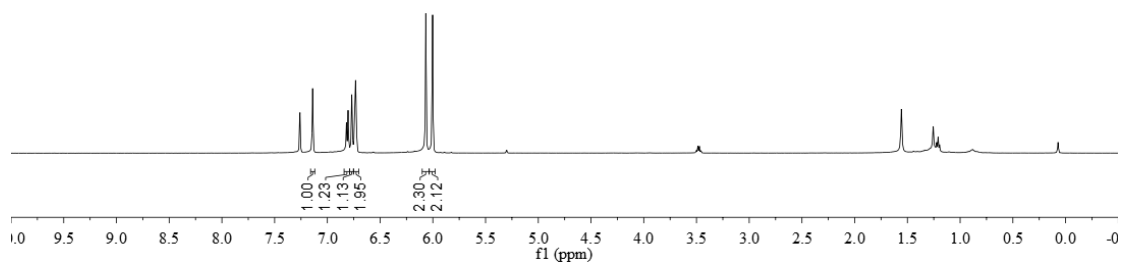

56.318

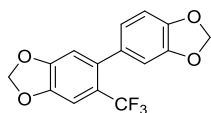

2d'' (CDCl<sub>3</sub>, 470 MHz)

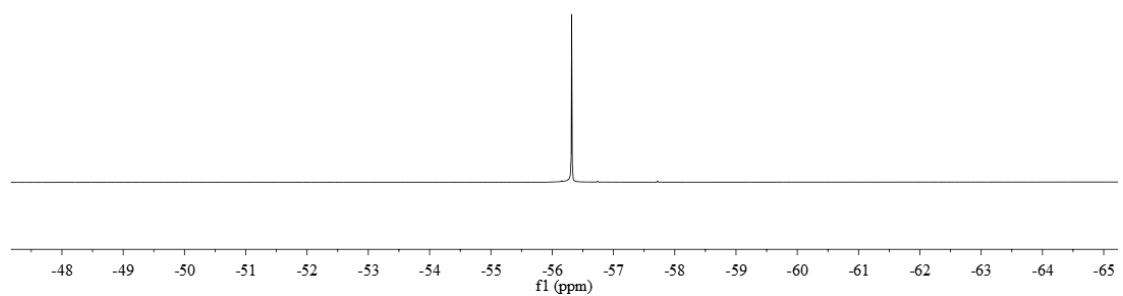

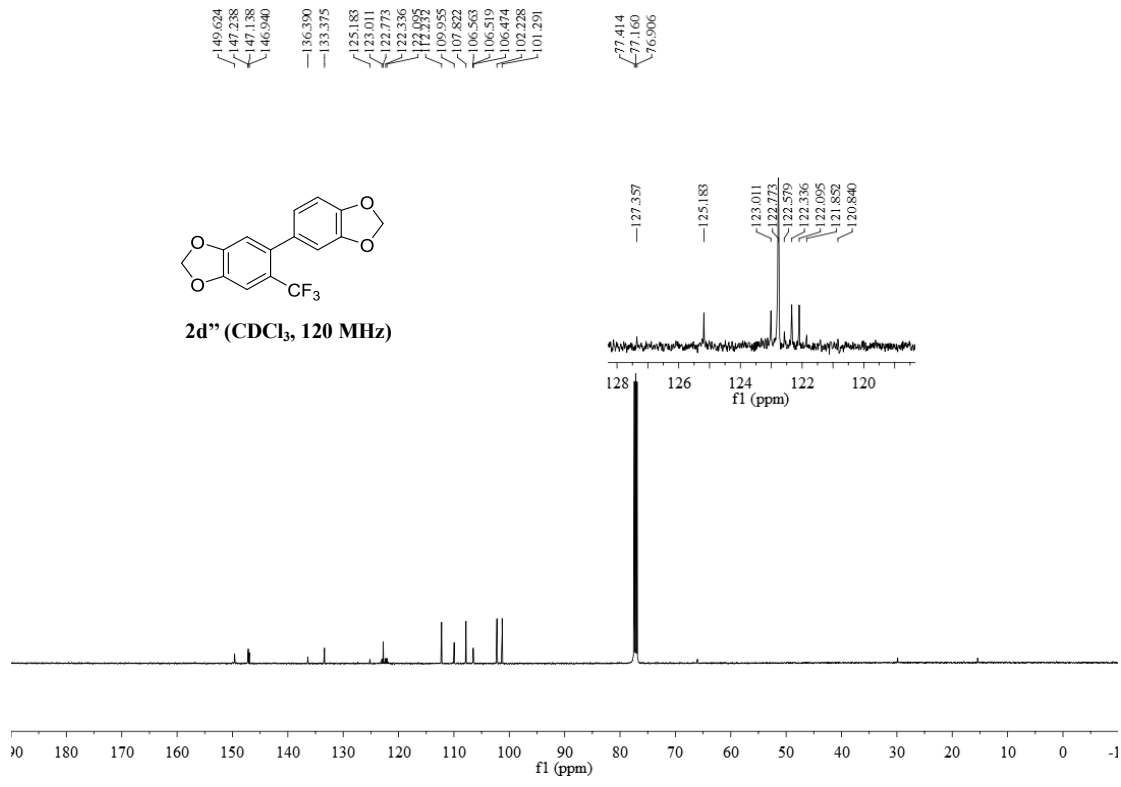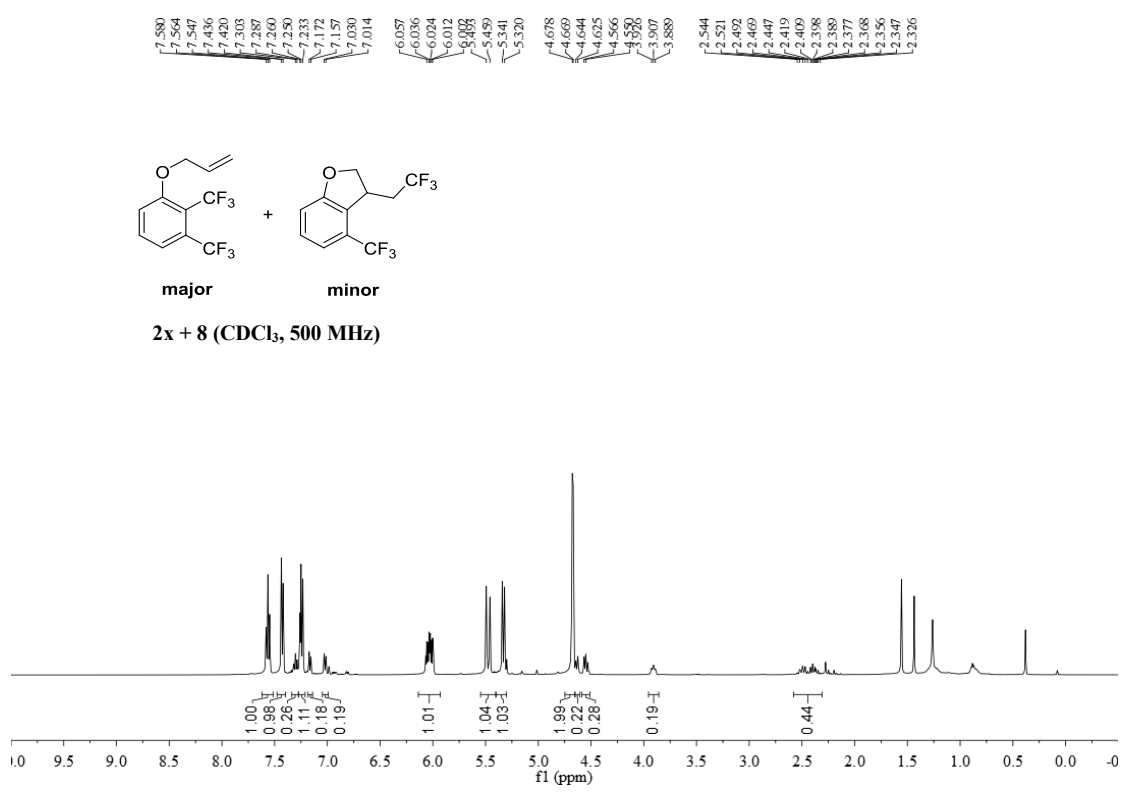

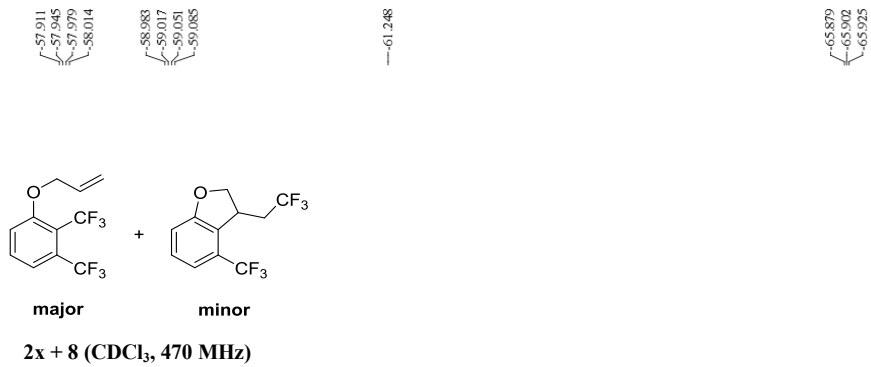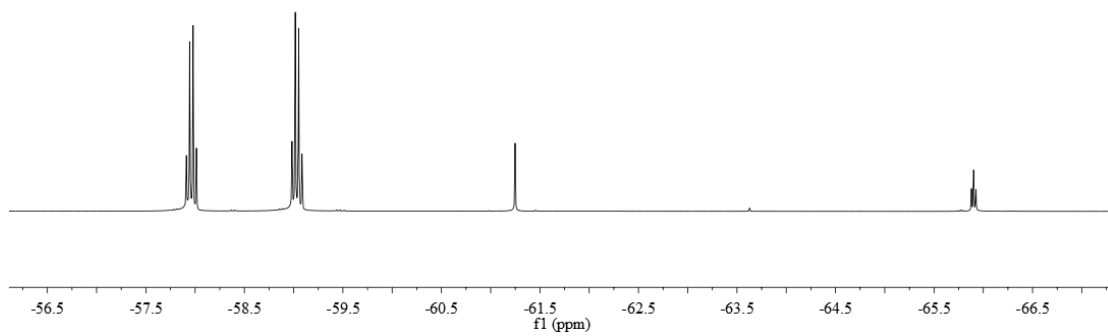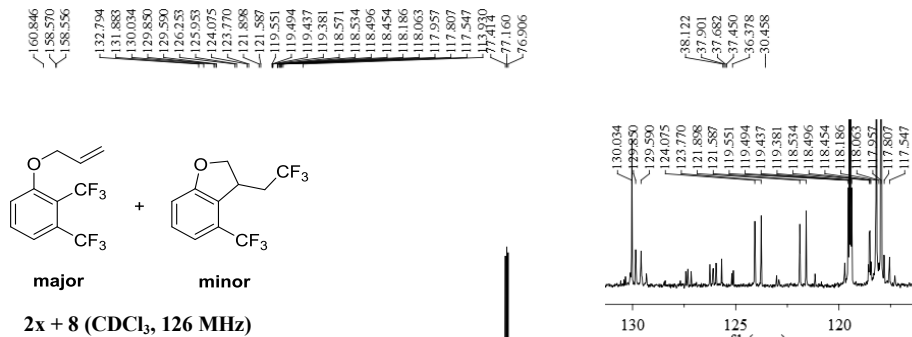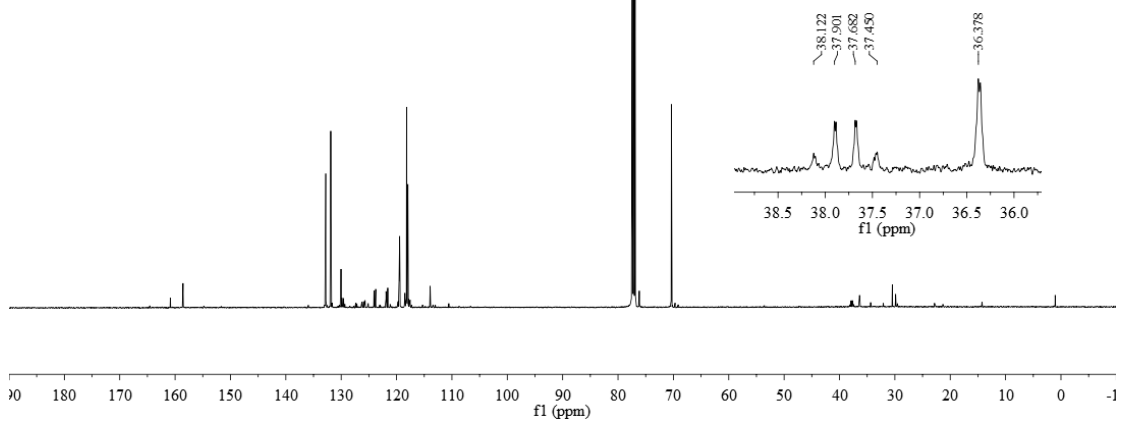

Supplement: c8sc03754j1.pdf [file c8sc03754j1.pdf]
